# Supplementary material for: YTH Domain Proteins Play an Essential Role in Rice Growth and Stress Response
Source: MDPI journal article supplement (doi:10.3390/plants11172206), 2022-08-25
Supplement: s1 [file s1]

Supplementary Table S1 Gene numbers of plant YTH genes

| Taxon               | Name                              | Brief |       | YTHDF    |     |     |      |       |        | YTHDC    |     |     |
|---------------------|-----------------------------------|-------|-------|----------|-----|-----|------|-------|--------|----------|-----|-----|
|                     |                                   |       | TOTAL | DF total | DFA | DFB | DFCI | DFCII | DFCIII | DC total | DC1 | DC2 |
| Dicot               | <i>Arabidopsis Thaliana</i>       | At    | 13    | 11       | 4   | 3   | 2    | 1     | 1      | 2        | 2   |     |
|                     | <i>Capsella rubella</i>           | Cr    | 12    | 10       | 3   | 3   | 2    | 1     | 1      | 2        | 2   |     |
|                     | <i>Boechera stricta</i>           | Bs    | 12    | 10       | 3   | 3   | 2    | 1     | 1      | 2        | 2   |     |
|                     | <i>Brassica rapa</i>              | Br    | 22    | 18       | 7   | 5   | 1    | 4     | 1      | 4        | 4   |     |
|                     | <i>Gossypium raimondii</i>        | Gr    | 13    | 11       | 5   | 3   | 2    | 0     | 1      | 2        | 2   |     |
|                     | <i>Eucalyptus grandis</i>         | Eg    | 6     | 4        | 2   | 1   | 1    | 0     | 0      | 2        | 2   |     |
|                     | <i>Populus trichocarpa</i>        | Pt    | 17    | 14       | 3   | 5   | 2    | 2     | 2      | 3        | 3   |     |
|                     | <i>Salix purpurea</i>             | Sp    | 20    | 18       | 5   | 7   | 2    | 3     | 1      | 2        | 2   |     |
|                     | <i>Linum usitatissimum</i>        | Lu    | 15    | 12       | 2   | 5   | 2    | 0     | 3      | 3        | 3   |     |
|                     | <i>Manihot esculenta</i>          | Me    | 14    | 12       | 5   | 4   | 1    | 1     | 1      | 2        | 2   |     |
|                     | <i>Glycine max</i>                | Gm    | 18    | 14       | 5   | 2   | 4    | 2     | 1      | 4        | 4   |     |
|                     | <i>Phaseolus vulgaris</i>         | Pv    | 11    | 9        | 3   | 1   | 2    | 2     | 1      | 2        | 2   |     |
|                     | <i>Medicago truncatula</i>        | Mt    | 9     | 8        | 3   | 1   | 2    | 1     | 1      | 1        | 1   |     |
|                     | <i>Vitis vinifera</i>             | Vv    | 10    | 8        | 2   | 3   | 1    | 1     | 1      | 2        | 2   |     |
|                     | <i>Solanum lycopersicum</i>       | Sl    | 7     | 4        | 1   | 1   | 1    | 0     | 1      | 3        | 3   |     |
|                     | <i>Solanum tuberosum</i>          | St    | 8     | 4        | 1   | 1   | 1    | 0     | 1      | 4        | 4   |     |
|                     | <i>Mimulus guttatus</i>           | Mg    | 10    | 7        | 2   | 1   | 2    | 0     | 2      | 3        | 3   |     |
|                     | <i>Amaranthus hypochondriacus</i> | Ah    | 9     | 7        | 2   | 2   | 1    | 0     | 2      | 2        | 2   |     |
|                     | <i>Aquilegia coerulea</i>         | Ac    | 7     | 6        | 2   | 1   | 1    | 1     | 1      | 1        | 1   |     |
| Monocot             | <i>Zea mays</i>                   | Zm    | 15    | 15       | 5   | 5   | 2    | 2     | 1      | 0        | 0   |     |
|                     | <i>Setaria italica</i>            | Si    | 13    | 12       | 4   | 3   | 3    | 1     | 1      | 1        | 1   |     |
|                     | <i>Panicum virgatum</i>           | Pvi   | 22    | 20       | 8   | 6   | 3    | 2     | 1      | 2        | 2   |     |
|                     | <i>Panicum hallii</i>             | Ph    | 12    | 11       | 4   | 3   | 2    | 1     | 1      | 1        | 1   |     |
|                     | <i>Brachypodium stacei</i>        | Bst   | 11    | 10       | 3   | 1   | 3    | 1     | 2      | 1        | 1   |     |
|                     | <i>Oryza sativa</i>               | Os    | 12    | 11       | 3   | 3   | 2    | 1     | 2      | 1        | 1   |     |
|                     | <i>Musa acuminata</i>             | Ma    | 19    | 17       | 7   | 5   | 2    | 2     | 1      | 2        | 2   |     |
|                     | <i>Ananas comosus</i>             | Aco   | 9     | 8        | 1   | 2   | 2    | 1     | 1      | 1        | 1   |     |
|                     | <i>Zostera marina</i>             | Zma   | 8     | 7        | 1   | 1   | 1    | 3     | 1      | 1        | 1   |     |
| Basal<br>Angiosperm | <i>Amborella trichopoda</i>       | Atr   | 7     | 5        | 1   | 1   | 1    | 1     | 1      | 2        | 2   |     |
| Fern                | <i>Selaginella moellendorffii</i> | Sm    | 3     | 1        | 1   |     |      |       |        | 2        | 2   |     |

|            |                                  |     |   |   |   |   |   |  |
|------------|----------------------------------|-----|---|---|---|---|---|--|
| Liverworts | <i>Marchantia polymorpha</i>     | Mpo | 3 | 1 | 1 | 2 | 2 |  |
| Moss       | <i>Physcomitrella patens</i>     | Pp  | 4 | 2 | 2 | 2 | 2 |  |
|            | <i>Sphagnum fallax</i>           | Sf  | 5 | 3 | 3 | 2 | 2 |  |
| Algae      | <i>Chlamydomonas reinhardtii</i> | Cre | 1 | 0 | 0 | 1 | 1 |  |
|            | <i>Dunaliella salina</i>         | Ds  | 1 | 0 | 0 | 1 | 1 |  |
|            | <i>Micromonas pusilla</i>        | Mp  | 1 | 1 | 1 | 0 | 0 |  |
|            | <i>Micromonas commoda</i>        | Mc  | 1 | 1 | 1 | 0 | 0 |  |

Supplementary Table S2 Gene numbers of animal and yeast YTH genes

| Taxon           | Latin                                | Brief |       | YTHDF    |        |        |        | YTHDC    |     |     |
|-----------------|--------------------------------------|-------|-------|----------|--------|--------|--------|----------|-----|-----|
|                 |                                      |       | TOTAL | DF total | YTHDF1 | YTHDF2 | YTHDF3 | DC total | DC1 | DC2 |
| Mammalia        | <i>Homo sapiens</i>                  | Hs    | 5     | 3        | 1      | 1      | 1      | 2        | 1   | 1   |
|                 | <i>Pongo abelii</i>                  | Pa    | 5     | 3        | 1      | 1      | 1      | 2        | 1   | 1   |
|                 | <i>Macaca fascicularis</i>           | Mf    | 5     | 3        | 1      | 1      | 1      | 2        | 1   | 1   |
|                 | <i>Bos taurus</i>                    | Bt    | 5     | 3        | 1      | 1      | 1      | 2        | 1   | 1   |
|                 | <i>Mus musculus</i>                  | Mm    | 5     | 3        | 1      | 1      | 1      | 2        | 1   | 1   |
|                 | <i>Dipodomys ordii</i>               | Do    | 5     | 3        | 1      | 1      | 1      | 2        | 1   | 1   |
|                 | <i>Ornithorhynchus anatinus</i>      | Oa    | 5     | 3        | 1      | 1      | 1      | 2        | 1   | 1   |
| Aves            | <i>Gallus gallus</i>                 | Gg    | 5     | 3        | 1      | 1      | 1      | 2        | 1   | 1   |
| Amphibia        | <i>Xenopus tropicalis</i>            | Xt    | 5     | 3        | 1      | 1      | 1      | 2        | 1   | 1   |
| Osteichthyes    | <i>Carassius auratus</i>             | Ca    | 5     | 3        | 1      | 1      | 1      | 2        | 1   | 1   |
|                 | <i>Danio rerio</i>                   | Dr    | 5     | 3        | 1      | 1      | 1      | 2        | 1   | 1   |
|                 | <i>Fundulus heteroclitus</i>         | Fh    | 6     | 4        | 2      | 1      | 1      | 2        | 1   | 1   |
|                 | <i>Nothobranchius furzeri</i>        | Nf    | 6     | 4        | 2      | 1      | 1      | 2        | 1   | 1   |
|                 | <i>Poecilia formosa</i>              | Pf    | 5     | 4        | 2      | 1      | 1      | 1        | 1   |     |
|                 | <i>Oncorhynchus mykiss</i>           | Om    | 11    | 8        | 4      | 2      | 2      | 3        | 2   | 1   |
|                 | <i>Salmo salar</i>                   | Ss    | 11    | 8        | 4      | 2      | 2      | 3        | 2   | 1   |
| Chondrichthyes  | <i>Callorhinchus milii</i>           | Cm    | 5     | 3        | 1      | 1      | 1      | 2        | 1   | 1   |
| Cephalochordata | <i>Branchiostoma floridae</i>        | Bf    | 2     | 1        | 1      |        |        | 1        | 0   | 1   |
| Ascidiacea      | <i>Ciona intestinalis</i>            | Ci    | 3     | 1        | 1      |        |        | 2        | 1   | 0   |
| Echinodermata   | <i>Strongylocentrotus purpuratus</i> | Spu   | 3     | 1        | 1      |        |        | 2        | 1   | 0   |
|                 | <i>Acanthaster planci</i>            | Ap    | 3     | 1        | 1      |        |        | 2        | 1   | 1   |
| Brachiopoda     | <i>Lingula anatina</i>               | La    | 3     | 1        | 1      |        |        | 2        | 1   | 1   |
| Mollusca        | <i>Octopus bimaculoides</i>          | Ob    | 3     | 1        | 1      |        |        | 2        | 1   | 1   |
|                 | <i>Mizuhopecten yessoensis</i>       | My    | 3     | 1        | 1      |        |        | 2        | 1   | 1   |
|                 | <i>Pomacea canaliculata</i>          | Pc    | 3     | 1        | 1      |        |        | 2        | 1   | 1   |
|                 | <i>Aplysia californica</i>           | Aca   | 3     | 1        | 1      |        |        | 2        | 1   | 1   |
|                 | <i>Crassostrea gigas</i>             | Cg    | 3     | 1        | 1      |        |        | 2        | 1   | 1   |
|                 | <i>Biomphalaria glabrata</i>         | Bg    | 3     | 1        | 1      |        |        | 2        | 1   | 1   |
| Insecta         | <i>Drosophila hydei</i>              | Dh    | 2     | 1        | 1      |        |        | 1        | 1   | 0   |
|                 | <i>Drosophila melanogaster</i>       | Dm    | 2     | 1        | 1      |        |        | 1        | 1   | 0   |
|                 | <i>Stomoxys calcitrans</i>           | Sca   | 3     | 1        | 1      |        |        | 2        | 1   | 0   |

|                 |                                   |     |   |   |   |   |   |   |
|-----------------|-----------------------------------|-----|---|---|---|---|---|---|
|                 | <i>Lucilia cuprina</i>            | Lc  | 3 | 1 | 1 | 2 | 1 | 0 |
|                 | <i>Habropoda laboriosa</i>        | Hl  | 3 | 1 | 1 | 2 | 1 | 0 |
|                 | <i>Pieris rapae</i>               | Pr  | 3 | 1 | 1 | 2 | 1 | 1 |
|                 | <i>Frankliniella occidentalis</i> | Fo  | 3 | 1 | 1 | 2 | 1 | 1 |
|                 | <i>Hyposmocoma kahamanoa</i>      | Hk  | 3 | 1 | 1 | 2 | 1 | 1 |
|                 | <i>Bombyx mori</i>                | Bm  | 3 | 1 | 1 | 2 | 1 | 1 |
|                 | <i>Tribolium castaneum</i>        | Tc  | 3 | 1 | 1 | 2 | 1 | 1 |
| Priapulida      | <i>Priapulus caudatus</i>         | Pca | 3 | 2 | 1 | 1 | 1 | 0 |
| Nematoda        | <i>Caenorhabditis elegans</i>     | Ce  | 1 | 0 | 0 | 1 | 0 | 0 |
| Platyhelminthes | <i>Clonorchis sinensis</i>        | Cs  | 2 | 1 | 1 | 1 | 1 | 0 |
|                 | <i>Opisthorchis viverrini</i>     | Ov  | 2 | 1 | 1 | 1 | 1 | 0 |
|                 | <i>Schistosoma haematobium</i>    | Sh  | 2 | 1 | 1 | 1 | 1 | 0 |
| Cnidaria        | <i>Orbicella faveolata</i>        | Of  | 3 | 1 | 1 | 2 | 1 | 1 |
|                 | <i>Exaiptasia pallida</i>         | Ep  | 3 | 1 | 1 | 2 | 1 | 1 |
|                 | <i>Stylophora pistillata</i>      | Spi | 2 | 1 | 1 | 1 | 0 | 1 |
| Porifera        | <i>Amphimedon queenslandica</i>   | Aq  | 2 | 1 | 1 | 1 | 1 | 0 |
| YEAST           | <i>Saccharomyces cerevisiae</i>   | Sc  | 1 | 0 | 1 | 0 | 0 | 0 |
|                 | <i>Schizosaccharomyces pombe</i>  | Sp  | 1 | 0 | 0 | 0 | 1 | 0 |

Supplementary Table S3 YTH proteins  
used in phylogenetic analysis

| Species name                      | Accession number* | name code** | YTH motif                                                                                                                                                                                                   |
|-----------------------------------|-------------------|-------------|-------------------------------------------------------------------------------------------------------------------------------------------------------------------------------------------------------------|
| <i>Ananas Comosus</i>             | Aco001739.1       | AcoYT HDF1C | AK-----FFVIKSYSEDDVHK--SIKYSVWSSTVSGNRKLECAFE-----DARKR-SAG-----<br>-----KTRNCP----VFLFFS-----VNASGQFC-----GVAEMVGPVDFHTDM-<br>DFWQ-QD-----KW-SGCFPVKWHIIKDVSNAK-LRHIILENNENK-PVTNSRDTQEIP-----YNTGINMLKIF  |
|                                   | Aco003339.1       | AcoYT HDF4C | AK-----FFMIKSFSEDDVQK--SIKYNVWASTTYGNKKLDMAFR-----DAQMV-VKE-----<br>-----KGTKCP----IFLFFS-----VNTSGQFV-----GLAEMIGPVDFKKNM-<br>EFWQ-QD-----RW-NGFFPLTWHIIKDIPNRH-FHSIKLENNDNQ-VVTFSRDTQEIG-----LPQGLKMLEIF  |
|                                   | Aco004279.1       | AcoYT HDF1A | AK-----FFVIKSYSEDDVHK--SIKYNVWASTPNGNKKLDAGYQ-----EAQEK-A-----<br>-----GGCP----VFLFFS-----VNTSGQFV-----GVAEMVGPVDFNKTV-<br>EYWQ-QD-----KW-NGCFPVKWHIVKDVPSNI-LKHITLENNDNK-PVTNSRDTQEVK-----LEQGLEMLKIF      |
|                                   | Aco004441.1       | AcoYT HDF2C | AL-----FFVIKSYSEDDIHK--SIKYNVWSSTPNGNRRLDNAFQ-----VGQEK-SRE-----<br>-----KGTKCP----VFLFFS-----VNASGQFC-----GLAEMIGRVDFSKNM-<br>DFWQ-QD-----KW-NGYFPVKWHIIKDIPNPQ-FRHLILENNDNK-PVTNSRDTQEVK-----FPQGTEMLSIF  |
|                                   | Aco007343.1       | AcoYT HDF3C | AK-----FFIIKSYSEDDVHK--SIKYNVWSSTPNGNKKLDAAYE-----DAQRL-SAL-----<br>-----KGVNCP----VFLFFS-----VNGSGRFC-----GVAEMLGRVDFQRDM-<br>DFWQ-QD-----KW-SGSFSVKWHIIKDVPNTN-FRQITLENNENK-PVTHSRDTQEMY-----IP-GTTMLKIF  |
|                                   | Aco007480.1       | AcoYT HDF2B | AM-----FFVIKSFSEDNIHK--SIKYGVWASTPSGNKKLDSAYH-----GAKER-----<br>-----GDPCP-----VNASGHFC-----GVAEMIGPVDFEKSVD-FWQ-<br>QN-----RW-SGCFPVKWRIVKDVNNL-FRHIVLENNDNK-PVSNSRDTQEVN-----LEQGLEMLNIF                  |
|                                   | Aco008320.1       | AcoYT HDF1B | AR-----FFIIKSYSEDNVHK--SIKYGVWASTANGNKKLDSAFH-----EAKER-----<br>-----EDPYP----IFLFFS-----VNASGQFC-----GVAEMVGPVDFEKSVD-<br>DYWQ-QD-----KW-TGQFPVKWHIVKDVNNL-FRHIILENNENK-PVTNSRDTQEVK-----LEQGLEMLTIF       |
|                                   | Aco008423.1       | AcoYT HDC1A | SR-----YFIVKSCNRENLEI--SVQQGIWATQRSNEAKLNEAFE-----SSEN-----<br>-----VILIFS-----INRTRHFQ-----GCAKMTSKIGGFIGG-GNWK-SA-----<br>-----HGTAH-----Y-GRNFSVKWLKCELSFNK-THHLRNPYNDNL-PVKISRDCQELE-----PFIGEQLASLL    |
|                                   | Aco009712.1       | AcoYT HDF2A | AK-----FFIIKSYSEDDVHK--SIKYNVWTSTPNGNKKLDAAYQ-----EAQAR-T-----<br>-----GGCP----IFLFFS-----VNTSGQFV-----GVAEMVGLVDFNKTV-<br>DYWQ-QD-----KW-HGCFSVKWHVVKDVPSNI-LKHITLENNDNK-PVTNSRDTQEVN-----LEQGLEMLKIF      |
| <i>Amaranthus hypochondriacus</i> | AHYPO_001321-RA   | AhYTH DF1B  | AK-----FFIIKSFSEDNIHR--SIKYGVWASTPHGNRKLDAAYQ-----EAKEK-----<br>-----GNCP----VLLFS-----VNASGQFC-----GVAEMVGPVDFDKNA-<br>DYWQ-QD-----RW-TGQFAVRWHIIKDIPNSK-FRHILLENNNDHK-PVTHSRDSQEVN-----QEQGIDMLRIF        |
|                                   | AHYPO_001693-RA   | AhYTH DF3C  | AK-----FYVIKSYSEVNVYN--CIKYNVWSSTEYGNKKLDAAFR-----DAEIK-ANE-----<br>-----TGVKCP----IFLFFS-----VNGSGQFV-----GVAEMIGKVDNFNKT-<br>KFWQ-LD-----KW-SGFFPLKWHIVKDVPSNQ-LRHILLENNENK-PVTFTTRDTQEIG-----LKHGLEMLKIF |

|                              |                 |               |                                                                                                                                                                                                            |
|------------------------------|-----------------|---------------|------------------------------------------------------------------------------------------------------------------------------------------------------------------------------------------------------------|
|                              | AHYPO_003351-RA | AhYTH<br>DF2B | AK-----FFIIKSFSEDNIHR--SIKYGIWASTPHGNRKLDAAAYQ-----EAKEK-----<br>-----GDYP----VFLIFS-----VNASGQFC-----GVAEMTGPVDFEKNA-DYWQ-<br>QD-----RW-TGQFTVRWHLIKDIPNSK-FRHILLENNDNK-PVTHSRDAQEVK-----LDLGIEMLKIF      |
|                              | AHYPO_010570-RA | AhYTH<br>DF1A | AK-----FFVIKSYSEDDVHK--SIKYNVWSSTPNGNKKLDLSYK-----EAQKK-S-----<br>-----GGCP----VFLFFS-----VNTSGQFV-----GLAEMVGPVDFHKNV-<br>EHWQ-QD-----KW-YGSFPVKWHIVKDVPNSL-LKHIILENNENK-PVTNSRDTQEVK-----LEQGLQILRIF     |
|                              | AHYPO_011235-RA | AhYTH<br>DF2C | AK-----FYVIKSYSEDDVHK--SIKYNVWSSTANGNKKLDAAFH-----DAEVK-ANE-----<br>-----TGVKCP----IFLFFS-----VNGSGQFV-----GVAEMTGKVDFKKNM-<br>GFWQ-QD-----KW-SGFFPVNWHIVKDVPNSQ-LRHILLENNDRK-PVTYTRDTQEIE-----LKEGLDMLKIF |
|                              | AHYPO_012466-RA | AhYTH<br>DC1A | TR-----YFIVKSCNRENLEL--SVQQGVWATQRSNEAKLNEAFD-----SVEH-----<br>-----VILIFS-----VNRTRHFQ-----GCAKMTSKIGETASG-GNWK-<br>HA-----HGTAH-----Y-GRNFSVKWLKLCELSFNK-TRHLRNPYNENL-PVKISRDCQELE-----PSVGEQLASLL       |
|                              | AHYPO_014122-RA | AhYTH<br>DF1C | AK-----FFVIKSYSEDDVHK--SIKYNVWSSTPNGNKKLSIAYE-----DAQKL-AAG-----<br>-----TPGGCP----IFLFFS-----VNASGQFC-----GVAEMVGPVDFDKDM-<br>DFWQ-QD-----KW-SGSFSVKWHIIKDVPNPT-FRHIILENNEHK-PVTNSRDTQEIM-----LKQGLDMLKLF |
|                              | AHYPO_014607-RA | AhYTH<br>DF2A | AK-----FFVIKSYSEDDVHK--SIKYNVWASTPTGNQKLDAAAYQ-----EAKGK-T-----<br>-----DACP----VFLIFS-----VNASGQFV-----GLAEMVGPVDFNKNM-<br>DFWQ-QD-----KW-TGCFPVKWHIVKDVPNSL-LKHITLENNDNK-PVTNSRDTQEVK-----LEQAVQVVKIF    |
|                              | AHYPO_015768    | AhYTH<br>DC1B | TR-----YFIIKSLNHENIQL--SIERGIWATQVMNEPILEEAFY-----NCHK-----<br>-----VILIFS-----VNSSGFFQ-----GYAQMMSSVGRRRD--NVWT-QG----<br>-----TGANN-----PW-GRSFRVKWLRSSNLAFHK-TLHLKNPLNEFK-PVKISRDCQELP-----PEIGEALCQLI  |
| <i>Aquilegia<br/>corulea</i> | Aqcoe1G060600   | AcYTH<br>DF1A | AK-----FFIIKSYSEDDVHK--SIKYSVWASTPSGNKKLNAGYQ-----ESQEK-S-----<br>-----GDCP----VFLCFS-----VNGSGQFV-----GLAEMVGPVDFDKSV-<br>EYWQ-QD-----KW-NGCFPLKWHIVKDIPNSL-LKQITLENNDNK-PVTNSRDTQEVK-----LEQGLQMLKIF     |
|                              | Aqcoe1G157200   | AcYTH<br>DF2C | AL-----FFVIKSYSEDDIHK--SIKYNVWASTPNGNKRLDSAYQ-----DAQEK-MGQ-----<br>-----KGSKCP----VFLFFS-----VNASGQFC-----GVAEMIGRVDFNKNM-<br>DFWQ-QD-----KW-NGFFPVKWHIIKDVPNPH-FRHIILENNDNK-PVTNSRDTQEVK-----FPQGLEMLNVF |
|                              | Aqcoe1G183700.1 | AcYTH<br>DC1A | SR-----YFVVKSCNRENLEL--SAQQGVWATQRSNEAKLNEAFD-----SAEN-----<br>-----VILIFS-----VNRTRHFQ-----GCAKMTSKIGEISGG-GNWK-<br>YA-----HGTAH-----Y-GRNFSVKWLKLCELSFHK-TRHLRNPYNDNL-PVKISRDCQELE-----PSIGQQLASLL       |
|                              | Aqcoe2G257600   | AcYTH<br>DF1C | GK-----FFVIKSYSEDDVHK--SIKYNVWSSTPNGNKRLDSAYE-----DAQRI-ASG-----<br>-----NSRGCP----VFLFFS-----VNASGQFC-----GVAEMVGRVDFNKDM-<br>EFWQ-QD-----KW-SGSFPVKWHIIKDVPNTN-FRHIILENNENK-PVTNSRDTQEIK-----YRQGTEMLKIF |
|                              | Aqcoe6G010000   | AcYTH<br>DF3C | AK-----FFIIKSYSEDDIHR--SIKYDVWSSTPHGNKKLNAAFH-----DAATI-YSE-----<br>-----TGTRCP----IFLFFS-----VNGSGQFL-----GFAEMIGPVDFEKDM-<br>DFWQ-QD-----KW-NGFFPVTHVIKDIPNNR-LRHIILENNSK-PVTYTRDTQEVG-----LKQGLEMLSIF   |

|                          |               |                            |                                                                                                                                                                                                              |
|--------------------------|---------------|----------------------------|--------------------------------------------------------------------------------------------------------------------------------------------------------------------------------------------------------------|
|                          | Aqcoe7G241300 | AcYTH<br>DF1B              | GK-----FFVIKSYSEDNVHK--SIKYGVWASTPNGNKKLDAA YH-----EAKEK-----<br>-----H--CP----VFL LFS-----VNASAQFC-----GVAEMVGPVDFDKSV-<br>DYWQ-QD-----KW-SGQFPVKWHIIKDVPNSQ-FRHIILENNDSK-PVTNSRDTQEVK-----LEQGLEMLNIF      |
|                          | Aqcoe5G460600 | AcYTH<br>DF2A              | AK-----FFIIKSYSEDDVHK--SIKYSVWASTPNGNKNLNAGYQ-----ESQEK-S-----<br>-----GD CP----VFLCFS-----VNGSGQFV-----GLAEMVGPVDFDKSV-<br>EYWQ-QD-----KW-NGCFPVKWHIVKDIPNSL-LKQITLENNDNK-PVTNSRDTQEVK-----LEQGLQMLKIF      |
| Arabidopsi<br>s thaliana | AT1G09810     | ECT11<br>(AtYTH<br>DF4C)   | AK-----FFVIKSYSEDDVHK--SIKYSVWSSTINGNKKLDAAFR-----DAETK-TLE-----<br>-----DGKKRP----IFLFFS-----VNASRQFV-----GLAEMVGYVDFNKDL-<br>DFWQ-VD-----KW-SGFFPV EWHVVKDIPNWE-LRHIILDNNEDK-PVTHTRDTHEIK-----LKEGLQMLSIF  |
|                          | AT1G27960     | ECT9<br>(AtYTH<br>DF2B )   | AK-----FFVIKSYSEDNVHK--SIKHCVWASTKNGNKKLDAA YR-----EAKKK-----<br>-----DVAC P----VFL LFS-----VNASSQFC-----GVAEMVGPVDFNTSV-<br>EYWQ-QD-----RW-SGHFPVQWLIVKDVPNSL-FRHIIESNDNK-PVTNSRDTQEVG-----LEKGIEMLDIF      |
|                          | AT1G30460     | CPSF30<br>(AtYTH<br>DC1A ) | NR-----YFVVKSNNREN FEL--SVQQGVWATQRSNEAKLNEAFD-----SVEN-----<br>-----VILIFS-----VNRTRHFQ-----GCAKMTSRIGGYIGG-GNWK-<br>HE-----HGTAQ-----Y-GRNFSVKWLKLCELSFHK-TRNLRNPYNENL-PVKISRDCQELE-----PSVGEQLASLL        |
|                          | AT1g48110     | ECT7<br>(AtYTH<br>DF2C )   | AK-----FFVIKSYSEDDVHK--SIKYNVWSSTLHGNKKLQSAYE-----DAQRI-ATE-----<br>-----KSCECP----IFLFFS-----VNASGLFC-----GMAEMTGPVSFDKDM-<br>DFWQ-QD-----KW-SGSFPVKWHIIKDVPNSY-FRHIILQNNENK-PVTNSRDTQEIM-----LKQGLEVLKIF   |
|                          | AT1G55500     | ECT4<br>(AtYTH<br>DF4A )   | AK-----FFIIKSYSEDDVHK--SIKYNVWASTPNGNKKLDAA YQ-----EAQQK-S-----<br>-----SGCP----VFLFFS-----VNASGQFI-----GLAEMKGPVDFNKNI-<br>EYWQ-QD-----KW-TGSFPLKWHILKDVPNSL-LKHITLEYNENK-PVTNSRDTQEVK-----LEQGLKVVKIF      |
|                          | AT1G79270     | ECT8<br>(AtYTH<br>DF3C)    | AI-----FFVIKSYSEDDIHK--SIKYNVWSSTLNGNKKLDSAYQ-----ESQKK-AAD-----<br>-----KSGKCP----VFLFFS-----VNASGQFC-----GVAEMIGRVDY EKSM-<br>EFWQ-QD-----KW-TGYFPVKWHIIKDVPNPQ-LRHIILENNENK-PVTNSRDTQEV R-----LPQGNEVLNIF |
|                          | AT3G03950     | ETC1<br>(AtYTH<br>DF1A)    | AK-----FFVIKSYSEDDVHN--CIKYGAWSSTPTGNKKLNAA YY-----EAKEN-S-----<br>-----QECP----VYLLFS-----VNASGQFV-----GLAEMVGPVDFNKTM-<br>EYWQ-QD-----KW-IGCFPVKWHIIKDIPNSL-LRHITLANNENK-PVTNSRDTQEVN-----LEHGTKIIKIF      |
|                          | AT3G13060     | ECT5<br>(AtYTH<br>DF1B)    | AK-----LFIKSYSEDNVHK--SIKYNVWASTPNGNKKLDAA YR-----EAKDE-----<br>-----KEPCP----LFL LFS-----VNASSQFC-----GVAEMVGPVDFE KSV-<br>DYWQ-QD-----KW-SGQFPVKWHIIKDVPNSQ-FRHIILENNDNK-PVTNSRDTQEV-----                  |
|                          | At3g13460     | ECT2<br>(AtYTH<br>DF2A )   | AM-----FFIIKSYSEDDVHK--SIKYNVWASTPNGNKKLAAAYQ-----EAQQK-A-----<br>-----GGCP----IFLFFS-----VNASGQFV-----GLAEMTGPVDFNTNV-<br>EYWQ-QD-----KW-TGSFPLKWHIVKDVPNSL-LKHITLENNENK-PVTNSRDTQEVK-----LEQGLKIVKIF       |
|                          | AT3G17330     | ECT6<br>(AtYTH<br>DF1C))   | AR-----FFVIKSYSEDDVHK--SIKYGVWSSTLNGNKKLQSVYE-----DAQRI-ATE-----<br>-----KSRECP----IFLFFS-----VNSSGLFC-----GVAEMTGPVSFDRDM-<br>DFWQ-QD-----KW-SGSFPVKWHIIKDVPNSY-FRHIILHNNENK-PVTNSRDTQEII-----LKQGLEVLKLF   |

|                             |                 |                           |                                                                                                                                                                                                             |
|-----------------------------|-----------------|---------------------------|-------------------------------------------------------------------------------------------------------------------------------------------------------------------------------------------------------------|
|                             | AT4G11970       | ECT12<br>(AtYTH<br>DC1B ) | TR-----YFIIKSLNYDNIQV--SVEKGIWATQVMNEPILEGAFH-----KSGR-----<br>-----VILIFS-----VNMSGFFQ-----GYAEMLSPVGWRRD--QIWS-QG---<br>-----GGKNN-----PW-GRSFKVKWLRLSELPFQK-TLHLKNPLNDYK-PVKISRDCQELP-----EDIGEALCELL    |
|                             | AT5G58190       | ECT10<br>(AtYTH<br>DF3B)  | AK-----FFIVKSFSEDNVHR--SIKYNVWASTPHGNKKLDTAYR-----DAEKM-----<br>-----GGKCP----IFLFFS-----VNASGQFC-----GVSEMVGPDVFEKDA-<br>GYWQ-QD-----RW-SGQFPVKWHIVKDIPNNR-FCHILLQNNDNK-PVTHSRDSQEVK-----LRQGIEMLRIF       |
|                             | AT5G61020       | ECT3<br>(AtYTH<br>DF3A)   | AK-----FYVIKSYSEDDIHK--SIKYSVWSSTPNGNKKLDASYN-----EAKQK-S-----<br>-----DGCP----VFLIFS-----VNTSGQFV-----GLAEMVGPDVFNKTV-<br>EYWQ-QD-----KW-IGCFPVKWHFVKDIPNSS-LRHITLENNENK-PVTNSRDTQEVK-----LEQGIKVIKIF      |
| <i>Capsella<br/>rubella</i> | Carubv10003808m | CrYTH<br>DC1B             | AK-----FFVIKSYSEDDIHK--SIKYNVWSSTPNGNKKLDASYN-----EAKQK-S-----<br>-----EGCP----VFLIFS-----VNTSGQFV-----GLAEMVGPDVFNKTV-<br>EYWQ-QD-----KW-IGCFPVKWHFVKDIPNSS-LRHITLENNENK-PVTNSRDTQEVK-----LEQGMKVIKIF      |
|                             | Carubv10008560m | CrYTH<br>DF1C             | AK-----FFIVKSFSEDNVHR--SIKYNVWASTPHGNKKLDTAYR-----DAEKM-----<br>-----GGKCP----IFLFFS-----VNASGQFC-----GVSEMAGPDVFEKDA-<br>GYWQ-QD-----RW-SGQFPVKWHIVKDVNNR-FCHILLQNNDNK-PVTHSRDSQEVK-----LRQGIEMLRIF        |
|                             | Carubv10008570m | CrYTH<br>DC1A             | AM-----FFVIKSYSEDDIHK--SIKYNVWSSTLNGNKKLDSAYQ-----ESQKK-IAE-----<br>-----KNVKCP----VFLFFS-----VNASGQFC-----GVAEMVGRVDYEKSM-<br>EFWQ-QD-----KW-TGYFPVKWHMIKDVNPQ-LRHIILENNENK-PVTNSRDTQEVN-----LPQGNEVLNIF   |
|                             | Carubv10008725m | CrYTH<br>DF3B             | AK-----FFVIKSYSEDDVHN--SIKYGAWSSTPTGNKKLNAAYY-----EAKEN-S-----<br>-----QECP----VYLLFS-----VNASGQFV-----GLAEMVGPDVFNKTM-<br>EYWQ-QD-----KW-IGCFPVKWHIHKDIPNSL-LRHITLENNENK-PVTNSRDTQEVN-----LDHGTKIIKIF      |
|                             | Carubv10011018m | CrYTH<br>DF4C             | AK-----FFVIKSYSEDDVHK--SIKYGVWSSTLHGNNKKLQSVYE-----DAQRI-VTE-----<br>-----KSCECP----IFLFFS-----VNASGLFC-----GVAEMTGPVSFNRDM-<br>DFWQ-QD-----KW-SGSFPVKWHIHKDVPNSY-FRHIILQNNENK-PVTNSRDTQEIM-----LKQGLEVLKLF |
|                             | Carubv10013132m | CrYTH<br>DF1B             | AM-----FFIIKSYSEDDVHK--SIKYNVWASTPNGNKKLAAAYQ-----EAQK-P-----<br>-----GGCP----IFLFFS-----VNASGQFV-----GLAEMTGPVDFNTNV-<br>EYWQ-QD-----KW-TGSFPLKWHIVKDVPSL-LKHITLENNENK-PVTNSRDTQEVK-----LEQGLKIVKIF        |
|                             | Carubv10013133m | CrYTH<br>DF1A             | AK-----LFIKSYSEDNVHK--SIKYNVWASTPNGNKKLDAAAYR-----EAKDE-----<br>-----KEPCP----LFLIFS-----VNASSQFC-----GVAEMVGPDVFEKSV-<br>DYWQ-QD-----KW-SGQFPVKWHIHKDVPNSQ-FRHIILENNNDNK-PVTNSRDTQEVK-----LEQGIEMLKIF      |
|                             | Carubv10013212m | CrYTH<br>DF3C             | AK-----FFVIKSYSEDDVHK--SIKYSVWSSTINGNKKLDAAFR-----DAETK-TRE-----<br>-----DGKKRP----IFLFFS-----VNASRQFV-----GLAEMAGYVDFKKDL-<br>NFWQ-VD-----KW-SGFFPVEWHVVKDIPNWE-LRHIILANNEDK-PVTHTRDTHEVK-----LKEGLQMLSIF  |
|                             | Carubv10013762m | CrYTH<br>DF2A             | AK-----FFVIKSYSEDNVYK--SIKYSVWASTKNGNKKLDAAAYR-----EAKTK-----<br>-----DVACP----VFLIFS-----VNASAQFC-----GVAEMVGAVDFNTSV-<br>EYWQ-QD-----RW-SGHFPVRWLIVKDVPSL-FRHIILENNNDNK-PVTNSRDTQEVG-----LEQGIEMLNIF      |



|                                           |                    |               |                                                                                                                                                                                                               |
|-------------------------------------------|--------------------|---------------|---------------------------------------------------------------------------------------------------------------------------------------------------------------------------------------------------------------|
|                                           | Carubv10021946m    | CrYTH<br>DF2C | NR-----YFVVKSCNRENFEL--SVQQGVWATQRSNEAKLNEAFD-----SVEN-----<br>-----VILIFS-----VNRTRHFQ-----GCAKMTSRIGGYIGG-GNWK-<br>HE-----HGTAQ-----Y-GRNFSVKWLKLCELSFHK-TRNLRNPYNENL-PVKISRDCQELE-----PSIGEQLASLL          |
|                                           | Carubv10026226m    | CrYTH<br>DF2B | AK-----FFVIKSYSEDDVHK--SIKYNVWSSTLHGNKKLQSAYE-----DAQKI-ASE-----<br>-----KSCECP----IFLFFS-----VNASGLFC-----GMAEMTGPVSFDKDM-<br>DFWQ-QD-----KW-SGSFPVKWHIIKDVPNSY-FRHIILQNNENK-PVTNSRDTQEIM-----LKQGLEVLKIF    |
|                                           | Carubv10026294m    | CrYTH<br>DF3A | TR-----YFIIKSLNYENIQV--SVEKGIWATQVMNEPILEGAFH-----KSGR-----<br>-----VILIFS-----VNMSGFFQ-----GYAEMLSPVGWRRD--HIWS-QG---<br>-----GGKNN-----PW-GRSFVKVWLRLSELPFQK-TLHLKNPLNDYK-PVKISRDCQELP-----EDIGEALCELL      |
| <i>Drosophila<br/>melanogas<br/>ter</i>   | sp Q9VZQ1          | DmYT<br>HDC1  | TR-----FFLIKSNSDNVQL--SKNKSVWATLPQNDANLNQAFK-----EARN-----<br>-----VLLIFS-----VNESGKFA-----GFARMAAPSRRDIPQ-VAWV-<br>LP-----PSISPK-----AL-GGVIELDWICKELSFNA-TLHLHNTWNEGK-PVKIGRDGQEIE-----PKIGGELCRLF          |
|                                           | CG6422-RA          | DmYT<br>HDF1  | AR-----FFVIKSYSEDDIHR--SIKYEIWCSTDHGNKRLDDAFK-----ERHEE-----<br>-----GGN----IMLFFS-----VNGSGHFC-----GMAQMMTPVDYNSTS-SVWS-<br>QD-----KW-RGKFKVKWIYVKDVPNGT-LRHIRLENNENK-SVTNSRDTQEVP-----NDKGIEVLQIL           |
| <i>Chlamydo<br/>monas<br/>reinhardtii</i> | Cre12.g516400.t1.2 | CreYTH<br>DC1 | IR-----YFIIRSNSLQNIFI---SVRTGAWATTRTNDPKLDAAFR-----SSRE-----<br>-----VRLIFS-----VMGSNAFQ-----GYATMRTSVGAFPKP-----<br>-----VIWENG-----QQFGRPFGVEWRVLFELPHDD-CNHIRNRLNDNK-VVYMARDCTELP-----QEQGDLLTTIM          |
| <i>Dunaliella<br/>salina</i>              | Dusal.0106s00010.1 | DsYTH<br>DC1  | VR-----YFIIRSYNQENVDI---SINVGGWATTKHNEIKLNEAYA-----TCDE-----<br>-----VRLVFS-----VNSSNCFQ-----GYAVMSTPVGQYRSI-----<br>-----IWSNG-----KAFGNAFGVDWRCVFNLEVWN-VKHLLNPLNENK-PVHVARDGQEVP-----TRVGDELVSIM           |
| <i>Homo<br/>sapiens</i>                   | sp Q9H6S0          | HsYTH<br>DC2  | VR-----YFIMKSSNLRN--LEI--SQQKGIWSTTPSNERKLNRA--FW-----ESSI-----<br>-----VYLVFS-----VQGSGHFQ-----GFSRM--SSEIGREKSQ-----<br>-----DWGSA-----GL-GGVFKVEWIRKESLPFQF-AHLLNPWNDNK-KVQISRDGQELE-----PLVGEQLLQLW       |
|                                           | sp Q96MU7          | HsYTH<br>DC1  | AR-----FFLIKSNNHEN--VSL--AKAKGVWSTLPVNEKKLNLA--FR-----SARS-----<br>-----VILIFS-----VRESGKFQ-----GFARL--SSESHHGGSP-IHWV-<br>LP-----AGMSAK-----ML-GGVFKIDWICRREL PFTK-SAHLTNPWNEHK-PVKIGRDGQEIE-----LECGTQLCLLF |
|                                           | sp Q9BYJ9          | HsYTH<br>DF1  | GR-----VFIKSYSEDD--IHR--SIKYSIWCSTEHG NKRLDSA--FR-----CMSSK-----<br>-----GP----VYLLFS-----VNGSGHFC-----GVAEM--KSPVDYGTSA-<br>GVWS-QD-----KW-KGKFDVQWIFVKDVPNNQ-LRHIRLENNDNK-PVTNSRDTQEVP-----LEKAKQVLKII      |
|                                           | sp Q7Z739          | HsYTH<br>DF3  | GR-----VFIKSYSEDD--IHR--SIKYSIWCSTEHG NKRLDAA--YR-----SLNGK-----<br>-----GP----LYLLFS-----VNGSGHFC-----GVAEM--KSVVDYNAYA-<br>GVWS-QD-----KW-KGKFEVKWIFVKDVPNNQ-LRHIRLENNDNK-PVTNSRDTQEVP-----LEKAKQVLKII      |
|                                           | NP_057342          | HsYTH<br>DF2  | GR-----VFIKSYSEDD--IHR--SIKYNIWCSTEHG NKRLDAA--YR-----SMNGK-----<br>-----GP----VYLLFS-----VNGSGHFC-----GVAEM--KSAVDYNTCA-<br>GVWS-QD-----KW-KGRFDVRWIFVKDVPNSQ-LRHIRLENNENK-PVTNSRDTQEVP-----LEKAKQVLKII      |

|                             |                                              |                |                                                                                                                                                                                                                        |
|-----------------------------|----------------------------------------------|----------------|------------------------------------------------------------------------------------------------------------------------------------------------------------------------------------------------------------------------|
| <i>Eucalyptus grandis</i>   | Eucgr.B03590.1                               | EgYTH<br>DF1A  | AK-----FFIIKSYSEDD--VHK--SIKYSVWASTPNGNKKLDAA---YR-----EAQEK-P-----<br>-----GSSP----VFLFFS-----VNTSGQFV-----GLAEM---VGPVDFHKSV-<br>EYWQ-QD-----KW-NGCFPVKWHIVKDVNSM-LKHITLENNENK-PVTNSRDTQEVK-----LVQGLKMIKIF          |
|                             | Eucgr.B03591.1                               | EgYTH<br>DF2A  | AK-----FFIIKSYSEDD--VHK--SIKYNVWASTPNGNKKLDAA---YR-----EAQEK-A-----<br>-----AGCP----IFLFFS-----VNTSGQFV-----GLAEM---<br>VGPVDFHKNV-EYWQ-QD-----KW-MGCFPVKWHIVKDVNNL-LKHITLENNENK-PVTNSRDTQEVK-----<br>LPQGLKMIKIF      |
|                             | Eucgr.D01949.1                               | EgYTH<br>DC1B  | IR-----YFIIKSLNHHN--LQL--SIEKGIWATQVMNEPILEEA--FH-----NSGK-----<br>-----VILIFS-----VNMSGFFQ-----GYAQM---MSPIGWRRD--KVWS-<br>QG-----NGRNN-----PW-GRSFKVKWLRLYDLPFQK-TLHLKNLLNDNK-PVKISRDCQELP-----QDVGEALCELL           |
|                             | Eucgr.E02496.1                               | EgYTH<br>DC1A  | SR-----YFIVKSCNREN--LEL--SVQQGVWATQRSNEAKLNEA--FD-----SAAN-----<br>-----VILIFS-----VNRTRHFQ-----GCAKM---TSRIGGAASG-<br>GNWK-YA-----HGTAH-----Y-GRNFSVKWLKLCESFQK-TRHLRNPYNENL-PVKISRDCQELE-----PSVGEQLASLL             |
|                             | Eucgr.H04096.1                               | EgYTH<br>DF1C  | AK-----FFVIKSYSEDD--VHK--SIKYNVWSSTPHGNKKLQSA---YE-----DAQKI-AAE-----<br>-----KTTNCP----IFLFFS-----VNASGQFC-----GVAEM---<br>VGQVDFHKNM-DFWQ-QD-----KW-TGSFPVKWHIHKDVQNTA-FRHIILENNENK-PVTNSRDTQEIM-----<br>QKQGLEMLKIF |
|                             | Eucgr.J03195.1                               | EgYTH<br>DF1B  | AK-----FFVIKSYSEDN--VHK--SIKYGVWASTPNGNRKLDAA---YR-----EAKEK-----<br>-----PDTCP----VFLFFS-----VNASAHFC-----GVAEM---<br>VGPVDFDRSF-DYWQ-QD-----RW-SGQFPVKWHVIKDV PNSQ-LRHIVLENNDNK-PVTNSRDTQEVK-----<br>LEQGIEMLNIF     |
| <i>Amborella trichopoda</i> | evm_27.model.AmTr_v<br>1.0_scaffold00001.426 | AtrYTH<br>DC1B | AF-----FFVIKSYSEDD--VHK--SIKYNVWASTPNGNKRLDNA---YQ-----DAQQK-ALE-----<br>-----KGSKCP----VFLFFS-----VNASGQFC-----GVAEM---<br>MGRVDFNQNM-DFWQ-QD-----KW-NGFFPVKWHVIKDV PNQ-FRHIILENNDNK-PVTNSRDTQEVK-----<br>FPQGIEMLNIF |
|                             | evm_27.model.AmTr_v<br>1.0_scaffold00004.54  | AtrYTH<br>DF1A | AK-----FFIIKSYSEDN--VHK--SIKYGVWASTANGNRKLDAA---YR-----ESKEK-----<br>-----DGHCP----VLLFS-----VNASAQFC-----GVAEM---<br>MGPVDFEKS SV-DYWQ-QD-----KW-SGQFPVKWHIVKDV PNSQ-FRHIILENNDNK-PVTNSRDTQEVK-----<br>LEQGLEILKIF    |
|                             | evm_27.model.AmTr_v<br>1.0_scaffold00025.287 | AtrYTH<br>DF1B | AK-----FFIIKSYSEDD--IHK--SIKYSVWASTPNGNKKLDAA---YK-----EAQEK-T-----<br>-----GGCP----VFLFFS-----VNASGQFL-----GVAEM---<br>VGPVDFNKNV-EFWQ-QD-----KW-NGCFPVKWHVVKDV PNQ-LKHIILENNDNK-PVTNSRDTQEVK-----<br>FDQGIEILKIF     |
|                             | evm_27.model.AmTr_v<br>1.0_scaffold00068.160 | AtrYTH<br>DF2C | TR-----YFVIKSLNHQN--IQL--SIEKGIWATQVMNEQILEEA--FH-----SSDR-----<br>-----VILIFS-----VNMSGFFQ-----GYAQM---MSPVGWRRE--<br>NVWS-GS-----SGGSN-----PW-GRTFKVKWLQLNNLAFQK-TLHLKNPLNDYK-PVKISRDCQELT-----QEVGEALCELL           |
|                             | evm_27.model.AmTr_v<br>1.0_scaffold00071.175 | AtrYTH<br>DF3C | AL-----FYVIKSFSEDD--VHK--SLKYNVWASTDFGNKKLDEA--FH-----GAQAK-LND-----<br>-----NGSRCP----VFLFFS-----VNGSGQFV-----GLAEM---                                                                                                |

|                        |                                             |                    |                                                                                                                                                                                                                        |
|------------------------|---------------------------------------------|--------------------|------------------------------------------------------------------------------------------------------------------------------------------------------------------------------------------------------------------------|
|                        |                                             |                    | TCKVDFKKTL-DFWQ-GD-----VW-NGFFPVKWHIVKDVPNHL-LTHIILKDNENK-AVTYSRDTQEVT-----<br>FSQGIEMLKIF                                                                                                                             |
|                        | evm_27.model.AmTr_v<br>1.0_scaffold00096.42 | AtrYTH<br>DF1C     | SR-----YFIVKSCNREN--LEL--SVQKGIWATQRSNESKLNEA---FD-----SSEN-----<br>-----VVLIFS-----INRTRHFQ-----GCAKM--TSKIGGYVGG-<br>GGWK-YA-----HGTAH-----Y-GRNFSLKWLKLCELSFHK-TRHLRNPYNENL-PVKISRDCQELE-----PSIGEQLASLL            |
|                        | evm_27.model.AmTr_v<br>1.0_scaffold00155.52 | AtrYTH<br>DC1A     | AK-----FFVIKSYSEDD--VHK--SIKYHVWSSTPSGNNRLNTA---FE-----DAQRR-SGG-----<br>-----KPGSCP----VFLFFS-----VNASGQFC-----GVAEM---<br>VGSVDFQKDM-DFWQ-QD-----KW-SGCFPVKWHFVKDVPNSY-FRHIILENNENK-PVTNSRDTQEIR-----<br>FPQGIEMLAIF |
| <i>Glycine<br/>max</i> | Glyma.01G214100.1                           | GmYT<br>HDC1B<br>a | AL-----FFVIKSYSEDD--IHK--SIKYNVWASTPNGNKRLDGA---FQ-----DAQKR-MEE-----<br>-----KGCKCP----VFLFFS-----VNASGQFC-----GVAEM---<br>TGRVDFNKSM-DFWQ-QD-----KW-NGYFPVKWHIIKDVPNPQ-LRHIILENNDHK-PVTSSRDTQEVs-----<br>FPQGVEMLNIF |
|                        | Glyma.02G072000.1                           | GmYT<br>HDF5A      | AK-----FFVIKSYSEDD--VHK--SIKYNVWSSTPHGNKKLENA---YE-----DAKKI-AAE-----<br>-----KSEVCP----IFLLFS-----VNASGQFC-----GVAEM---<br>VGTVDfSKNM-DFWQ-QD-----KW-SGSFPVKWHIIKDVPNPn-FRHIILENNENK-PVTNSRDAQEIM-----<br>YLKGLEMLKIF |
|                        | Glyma.05G166600.1                           | GmYT<br>HDF2A      | SR-----YFIVKSCNREN--LEL--SVQQGVWATQRSNESKLNEA---FD-----SVEN-----<br>-----VILVFS-----VNRTRHFQ-----GCAKM--TSRIGGSVAG-<br>GNWK-YA-----HGTAH-----Y-GRNFSVKWLKLCELSFHK-TRHLRNPYNENL-PVKISRDCQELE-----PSIGEQLASLL            |
|                        | Glyma.07G000900.1                           | GmYT<br>HDF2B      | TK-----YFVIKSLNHQN--IHL--SIEKGIWATQIMNEPILQEA---YH-----NSGS-----<br>-----VILIFS-----VNMSGSFQ-----GYAQM--MTSIGRGRD--NAWS-<br>EG-----TGKSN-----PW-GRSFKVKWLCLNDLPFHK-TLHLKNPLNDYK-PVKISRDCQELS-----PDIGLALCKLL           |
|                        | Glyma.07G233400.1                           | GmYT<br>HDF2C      | AK-----FFVIKSYSEDD--VHK--SIKYNVWSSTPHGN-KLENA---YE-----DAKKI-AAE-----<br>-----KSEVCP----IFLFFS-----VNASGQFC-----GVAEM---<br>VGTVDfNKNM-DFWQ-QD-----KW-SGSFPLKWHIIKDVPNPn-FRHITLENNENK-PVTNSRDTQEIM-----<br>YWKGLEMLKIF |
|                        | Glyma.08G124600.1                           | GmYT<br>HDF1A      | SR-----YFIVKSCNREN--LEL--SVQQGVWATQRSNESKLNEA---FD-----SVEN-----<br>-----VILIFS-----VNRTRHFQ-----GCAKM--TSKIGGSVAG-<br>GNWK-YA-----HGTAH-----Y-GRNFSVKWLKLCELSFHK-TRHLRNPYNENL-PVKISRDCQELE-----PSIGEQLASLL            |
|                        | Glyma.08G162200.1                           | GmYT<br>HDF6C      | AK-----FFVIKSYSEDN--VHK--SIKYGVWASTPNGNRKLDDA---YR-----QAMEK-----<br>-----QDACP----IFLFFS-----VNAsAQFC-----GVAEM---<br>VGpVNFDKSV-DFWQ-QD-----KW-SGQFPLKWHIIKDVPNSQ-FRHIILENNDNK-PVTNSRDTQEVK-----<br>LGQGVEMLTIF      |
|                        | Glyma.08G226100.1                           | GmYT<br>HDF1B      | AL-----FFVIKSYSEDD--IHK--SIKYNVWASTPNGNKRLDGA---FQ-----DAQKR-MEE-----<br>-----KGCKCP----VFLFFS-----VNASGQFC-----GVAEM---<br>TGRVDFNKSM-DFWQ-QD-----KW-NGYFSVKWHIIKDVPNPQ-LRHIILENNDHK-PVTNSRDTQEVs-----<br>FPQGVEMLNIF |

|                                |                    |                    |                                                                                                                                                                                                                            |
|--------------------------------|--------------------|--------------------|----------------------------------------------------------------------------------------------------------------------------------------------------------------------------------------------------------------------------|
|                                | Glyma.09G022200.1  | GmYT<br>HDC1A<br>b | AK-----FFVIKSYSEDD--IHK--SIKYNVWASTQNGNKKLDAA---YH-----EAQQK-P-----<br>-----GGCP----VFLFFS-----VNTSGQFV-----GLAEM---<br>IGPVDFNKS SV-EYWQ-QD-----KW-NGCFPLKWHVVKDVPNNL-LRHITLDNNENK-PVTNSRDTQEV M-----<br>LEPGLKLIKIF      |
|                                | Glyma.09G031200.1  | GmYT<br>HDF4C      | AK-----FFVIKSYSEDD--VHK--SIKYNVWSSTPHGNKKLQSA---HE-----DAKRI-ASG-----<br>-----KFGSCP----IFLFFS-----VNASGQFC-----GVAEM---<br>IGPVDFNKM DM-DFWQ-QD-----KW-SGSFPVKWYI IKDVS NAN-FRHIILENNENK-PVTNSRDTQEIM-----<br>YSKGLEMLKIF |
|                                | Glyma.11G027800.1  | GmYT<br>HDC1B<br>b | AK-----FFVIKSYSEDN--VHK--SIKYGVWASTPNGNRKLDAA---YL-----QAMEK-----<br>-----QDACP----IFLFFS-----VNASAQFC-----GVAEM---<br>VGPNVFDKSV-DFWQ-QD-----KW-SGQFPVKWHI IKDVPNSQ-FRHIVLENNDNK-PVTNSRDTQEV K-----<br>LTQGVEMLTIF        |
|                                | Glyma.15G128500.1  | GmYT<br>HDC1A<br>a | AK-----FFVIKSYSEDD--IHK--SIKYNVWASTQNGNKKLDAA---YQ-----EAQQK-P-----<br>-----GGTP----VFLFFS-----VNTSGQFV-----GLAEM---<br>IGPVDFNKS SV-EYWQ-QD-----KW-NGCFPLKWHIVKDVPNNL-LRHITLDNNENK-PVTNSRDTQEV M-----<br>LEPGLKLIKIF      |
|                                | Glyma.15G136400.1  | GmYT<br>HDF3C      | AK-----FFVIKSYSEDD--IHK--SIKYK VWASTFNGNKKLDAA---YH-----ESKEK-P-----<br>-----GD CP----VFL LFS-----VNTSGQFV-----GLAEM---VSPLDFGRTV-<br>EYWQ-QD-----RW-SGCFSVKWHI IKDIPNSV-LRPITLENNENK-PVTNSRDTQEV K-----FEKGIQILKIF        |
|                                | Glyma.15G265400.1  | GmYT<br>HDF5C      | IK-----YFIIKSLNHQN--IHL--SIEKGIWATQIMNEPILEEA---FH-----NSGS-----<br>-----VILIFS-----VNMSGSFQ-----GYAQM---MSSIGRGRD--NVWS-<br>EG-----TGKSN-----PW-GRSFKVKWMCLNDLPFHK-TLHLKNPLNDYK-PVKISRDCQELS-----PDIGLALCELL              |
|                                | Glyma.16G003200.1  | GmYT<br>HDF7C      | AK-----FYVIKSFNEDD--VHK--SVKYNVWTSTPNGNKKLNAA---FL-----DAEAK-LRQ-----<br>-----TGTKCP----VFLFFS-----VNASRQFV-----GVAEM---<br>LGPVDFKN DM-NFWK-LD-----KY-NGFFPIKWHI IKDVPNNQ-FVHIILPSNENK-PVTYTRDTQEIG-----LKEGLEMLNIF       |
|                                | Glyma.16G041600.1  | GmYT<br>HDF4A      | AK-----FFVIKSYSEDD--IHK--SIKYS AWASTPNGNKKLDSA---YQ-----EAKEK-P-----<br>-----GGCP----IFLLFS-----VNTSGQFV-----GLAEM---LGPVDFGKTV-<br>DYWQ-QD-----RW-TGCFSVKWHVI KDIPNSV-LRHITLENNENK-PVTNSRDTQEV K-----FEKGVQLVKIF          |
|                                | Glyma.17G038400.1  | GmYT<br>HDF1C      | AK-----FFVIKSYSEDD--VHK--SIKYNVWSSTPHGNKKLQST--HE-----DAKRI-ASG-----<br>-----NFGSCP----IFLFFS-----VNASGQFC-----GVAEM---<br>IGPVDFNKM DM-DFWQ-QD-----KW-SGSFPVKWHI IKDVPNAN-FRHIILENNENK-PVTNSRDTQEIM-----<br>YSKGLEMLKIF   |
|                                | Glyma.19G110800.1  | GmYT<br>HDF3A      | AK-----FFVIKSYSEDD--IHK--SIKYS AWASTPNGNKKLDAA---YQ-----EAKEK-P-----<br>-----GGCP----IFLLFS-----VNTSGQFV-----GLAEM---LGPVDFGKTV-<br>DYWQ-QD-----RW-TGCFSVKWHVI KDIPNSV-LRHITLENNENK-PVTNSRDTQEV K-----FEKGVQIAKIF          |
| <i>Gossipium<br/>raimondii</i> | Gorai.002G031800.1 | GrYTH<br>DF2C      | AK-----FFIIKSYSEDD--VHK--SIKYNVWASTSTGNKKLDAA---FH-----ETKGN-P-----<br>-----DICP----VFL LFS-----VNTSGQFV-----GLAEM---VGPVDFNKTV-<br>EYWQ-QD-----KW-TGCFPVKWHI IKDVPNTS-LRHITLENNENK-PVTNSRDTQEV N-----FEQGVQILKIF          |

|                    |               |                                                                                                                                                                                                                         |
|--------------------|---------------|-------------------------------------------------------------------------------------------------------------------------------------------------------------------------------------------------------------------------|
| Gorai.002G182900.1 | GrYTH<br>DF3B | AK-----FFIIKSYSEDN--VHK--SIKYGWVASTPNGNKKLDAA---YR-----EAKEN-----<br>-----QDPCP----VFLFFS-----VNASAQFC-----GVAEM---<br>VGPVDFDKSV-DYWQ-QD-----KW-SGQFPVKWHFIKDVPNSQ-FRHIILENNDNK-PVTNSRDTQEVN-----<br>LEQGIEMLNIF       |
| Gorai.004G020600.1 | GrYTH<br>DF1A | AK-----FFIIKSYSEDN--VHK--SIKYGWVASTPNGNKRLDAA---YR-----EAMEN-----<br>-----QDNCP----VFLFFS-----VNASAQFC-----GVAEM---<br>VGPVDFDKSV-DYWQ-QD-----KW-SGQFPVKWHIIKDVPNSQ-LRHIILENNDNK-PVTNSRDTQEVK-----<br>LEQGLEMLSIF       |
| Gorai.004G205800.1 | GrYTH<br>DC1B | SR-----YFIVKSCNREN--LEL--SVQQGVWATQRSNEAKLNEA---FD-----SAEN-----<br>-----VILVFS-----VNRTRHFQV-----GCAKM--TSKIGGSVAG-<br>GNWK-YA-----HGTAH-----Y-GRNFSVKWLKLCELSFHK-TRHLRNPYNENL-PVKISRDCQELE-----PSVGEQLASLL            |
| Gorai.004G244600.1 | GrYTH<br>DF3A | AK-----FFVIKSYSEDD--VHK--SVKYNVWASTSNGNKKLDAA---FH-----EAKKEE-P-----<br>-----DGCP----VFLFFS-----VNTSGQFV-----GVAEM---<br>VDQVDFNKTV-EYWQ-QD-----KW-TGCFPVKWHIIKDVPNTL-LRHITLENNENK-PVTNSRDTQEVN-----<br>FEQGIHILKIF     |
| Gorai.005G070500.1 | GrYTH<br>DF1C | AM-----FFVIKSYSEDD--VHK--SIKYNVWASTSNGNKKLDAA---FR-----EAKEK-P-----<br>-----DGCP----VFLFFS-----VNTSGQFV-----GLAEM---<br>VGPVDFNKTV-EYWQ-QD-----KW-TGCFPVKWHIVKDVPNAS-LRHITLKNENK-PVTNSRDTQEVN-----<br>FEQGIQILKIF       |
| Gorai.005G265300.1 | GrYTH<br>DF3C | AK-----FFVIKSYSEDD--VHK--SMKYNVWSSTPNGNRKLDAA---FH-----EAETR-ESE-----<br>-----TGTKCP----IFLLFS-----VNGSGQFV-----GLAEM---<br>IGKVDFNKDM-DFWQ-LN-----KW-NGFFPVKWHVIKDIPNKE-LFHIILENNENK-PVTHSRDTQEIG-----<br>LKQGLELLRIF  |
| Gorai.007G288900.1 | GrYTH<br>DF2A | AK-----FFVIKSYSEDD--VHK--SIKYNVWSSTPHGNKKLDSA---FE-----DAEKI-AAG-----<br>-----KPSGCP----IFLFFS-----VNASGQFC-----GVAEM---<br>IGPVDFQKDM-DFWQ-QD-----KW-SGSFPVKWHIIKDVPNSH-FRHIILGNNENK-PVTNSRDTQEIM-----<br>YKQGMEMPLKVF |
| Gorai.007G289200.1 | GrYTH<br>DF4A | AK-----FFVIKSYSEDD--VHK--SIKYNVWASTPNGNRKLDAA---FC-----EAKEK-P-----<br>-----DGCP----IFLLFS-----VNTSGQFV-----GLAEM---<br>VGAVDFNRTV-EYWQ-QD-----KW-TGCFPVKWHIVKDVPNTS-LRHITLKNENK-PVTNSRDTQEVN-----<br>FEQGMQILKIF       |
| Gorai.008G046800.1 | GrYTH<br>DC1A | KR-----YFIIKSLNHQN--IQL--SIDKGIWATQVMNEPILEDA---FH-----NSGC-----<br>-----VILIFS-----VNMSGFFQ-----GYAQM--MSSVGWRRD--<br>NVWS-QG-----SGKGN-----PW-GRSFKVKWLCLNHLPFQK-TLHLKNPLNDYK-PVKISRDCQELP-----QDIGEALCELL            |
| Gorai.009G120700.1 | GrYTH<br>DF2B | AK-----FFVIKSYSEDD--VHK--SIKYNVWASTPNGNKKLDAA---YQ-----EAQQK-S-----<br>-----GHCP----IFLFFS-----VNTSGQFV-----GIAEM---<br>VGAVDFQKNV-EFWQ-QD-----KW-TGCFPVRWLIKDVPNNS-LKHITLENNENK-PVTNSRDTQEIK-----<br>LDQGLKLLKIF       |

|                 |                       |               |                                                                                                                                                                                                                        |
|-----------------|-----------------------|---------------|------------------------------------------------------------------------------------------------------------------------------------------------------------------------------------------------------------------------|
|                 | Gorai.011G001700.1    | GrYTH<br>DF1B | AK-----FFVIKSYSEDN--VHK--SIKYGIWASTPIGNKKLDTA---YH-----EAKAI-----<br>-----QGTCP----VLLFS-----VNSSAQFC-----GVAEM---VGPVDFDKSV-<br>DYWL-QN-----KW-SGQFPVKWHIIKDVPNSQ-FRHILLESNDNK-PVTNSRDTQEVE-----FEQGIEMINIF           |
|                 | Gorai.013G123200.1    | GrYTH<br>DF5A | AK-----FFVIKSYSEDD--VHK--SIKYNVWSSTPHGNKKLDSA--FE-----DAQRI-AAG-----<br>-----KPRGCS----IFLFFS-----VNASGQFC-----GVAEM---<br>IGSVDFQKAM-DFWQ-QD-----KW-SGSFPVKWHIIKDVPNSH-FRHIIVENNENK-PVTNSRDTQEIM-----<br>FKQGVEMLKVF  |
| <i>Zea mays</i> | GRMZM2G004997_T0<br>2 | ZmYTH<br>DF3B | AK-----FFVIKSYTEDH--VHR--SIKYNVWASTASGNRKLDSA---YR-----AAREK-----<br>-----EEHCP----IFLFFS-----VNGSGQFC-----GVAEM---IGPVDFDRSV-<br>NYWQ-QD-----KW-SGQFPVKWHIIKDVPNNL-LRHIILENNDNK-PVTNSRDTQEVK-----LEQGLQMLTIF          |
|                 | GRMZM2G025488_T0<br>2 | ZmYTH<br>DF1B | AR-----FFIIKSYSEDN--VHK--SVKYGVWASTTNGNKKLDSA---YR-----EAKEK-----<br>-----GEHCP----IFLLFS-----VNASAQFC-----GVAEM---IGPVDFEKS-<br>DYWQ-QD-----KW-TGQFPVKWHIVKDVPNNL-FRHIILENNDNK-PVTNSRDTQEVK-----LEQGMEMLKIF           |
|                 | GRMZM2G056573_T0<br>1 | ZmYTH<br>DF3C | AK-----FFVIKSIGEAD--VHK--SIKYGVWSSSSNGNIKLDSA--FR-----DADRI-SRR-----<br>-----HSTKCP----VFLFFS-----VNGSGHFC-----GMAEM---<br>VGPVDFHKDM-DFWC-QD-----KW-TGCFPVRWHIVKDIPNGF-LQHITLQNNENK-PVTHSRDTQEIP-----YLPGISVIKIF      |
|                 | GRMZM2G076062_T0<br>2 | ZmYTH<br>DF1A | AK-----FFVIKSYSEDD--IHK--SVKYNVWASTTNGNKKLDAA---YQ-----EAQSK-G-----<br>-----SACP----IFLFFS-----VNTSGQFV-----GVAEM---<br>TGAVDFECTL-GYWQ-QD-----KW-NGSFSVKWHIVKDVPNNI-LKHIILENNENK-PVTNSRDTQEIH-----<br>LEQGLQMLKIF     |
|                 | GRMZM2G098174_T0<br>1 | ZmYTH<br>DF4C | AK-----FFVIKSIGEAD--VHK--SIKYGVWSSSSSGNSKLDSA--FR-----DADRI-SRR-----<br>-----HSTKCP----VFLFFS-----VNGSGHFC-----GMAEM---<br>VGPVDFHKDM-DFWC-QD-----KW-TGCFPVRWHIVKDIPNGS-LQHITLQNNENK-PVTHSRDTQEV-----<br>YLPGMSVINIF   |
|                 | GRMZM2G102069_T0<br>1 | ZmYTH<br>DF4B | AR-----FYVIKSYTEDH--IHK--SIKYNVWASTPRGNRKLNAG---YH-----EAKAK-----<br>-----EDHCP----IFLFFS-----VNSSGHFC-----GVAEM---IGPVNFDKSV-<br>DYWQ-NE-----RW-NGQFPVKWHIVKDVPNNI-VRHIILENNENK-RVTNSRDTQEVK-----LKQGLQMLAIF          |
|                 | GRMZM2G126338_T0<br>1 | ZmYTH<br>DF3A | AK-----FFVIKSYSEDD--VHK--SIKYNVWASTPNGNKKLDAG---YR-----EAQEK-S-----<br>-----SDCP----VFLFFS-----VNTSGQFV-----GVAEM---<br>VGPVDFDKTV-EYWQ-QD-----KW-NGCFPLKWHIVKDVPNNT-LKHITLDNNDNK-PVTNSRDTQEVK-----<br>LEQGLEMLKIF     |
|                 | GRMZM2G127780_T0<br>1 | ZmYTH<br>DF2C | AL-----FFVIKSYSEDD--IHK--SVKYNVWASTPNGNKRLDNA---YR-----VAQER-IAE-----<br>-----KGTKCP----VFLFFS-----VNASGQFC-----GVAEM---<br>VGPVDFNRNM-NFWQ-QD-----KW-NGFFSVKWHIIKDVPNPQ-FRHIILENNENK-PVTNSRDTQEVN-----<br>FSQGTEMLNIF |
|                 | GRMZM2G144726_T0<br>1 | ZmYTH<br>DF4A | AK-----FFIIKSYSEDD--VHK--SVKYNVWASTPNGNKKLDAA---YQ-----EAKEK-S-----<br>-----SETP----VLLFS-----VNASGQFV-----GLAEM---                                                                                                    |

|                    |                       |                                                                                                                                                                                                                        |                                                                                                                                                                                                                        |
|--------------------|-----------------------|------------------------------------------------------------------------------------------------------------------------------------------------------------------------------------------------------------------------|------------------------------------------------------------------------------------------------------------------------------------------------------------------------------------------------------------------------|
|                    |                       |                                                                                                                                                                                                                        | VGRVDFEKTVEHWQ-QD-----KW-TGCFPVKWHIVKDVPNSL-LKHIILENNENK-PVTNSRDTHEVK-----<br>LEQGLQVLKIF                                                                                                                              |
| GRMZM2G169116_T01  | ZmYTHDF1C             | AL-----FFVIKSYSEDD--IHK--SIKYNVWASTPNGNKRLDNA---YR-----LAQER-MAE-----<br>-----KGTKCP----VFLFFS-----VNASGQFC-----GVAEM---<br>VGPVDFNRNM-NFWQ-QD-----KW-NGFFSVKWHIIKDVPNPQ-FRHIILENNENK-PVTNSRDTQEVK-----<br>FSQGTEMLNIF |                                                                                                                                                                                                                        |
| GRMZM2G303312_T01  | ZmYTHDF5C             | AK-----FFMIKSYSEDD--IHK--GIKYNVWASTPNGNNKLDAA---YH-----EAQNL-M-D-----<br>-----SGERCP----VFLFFS-----VNTSGQFV-----GLAEM---<br>LGPVDFKKTMDWE-ED-----KW-SGFFPIKWHIIKDIPNRL-FKHIILENNDNR-IVTFSRDTQEIG-----LPQGVQMLKIF       |                                                                                                                                                                                                                        |
| GRMZM2G330019_T01  | ZmYTHDF2A             | AK-----FFVIKSYSEDD--IHK--SVKYNVWASTTNGNKKLDAA---YQ-----EAQSK-G-----<br>-----SACP----IFLFFS-----VNTSGQFV-----GVAEM---<br>TGAVDFEKTLEYWQ-QD-----KW-NGSFSVKWHIVKDVPNNI-LKHIILENNENK-PVTNSRDTQEIR-----<br>LEQGLQMLKIF      |                                                                                                                                                                                                                        |
| GRMZM2G340130_T01  | ZmYTHDF5A             | AK-----FFIIKSYSEDD--VHK--SVKYNVWASTPNGNKKLDAA---YQ-----EAKEK-S-----<br>-----SETP----VLLFS-----VNASGQFV-----GLAEM---<br>VGRVDFNKTVDHWQ-QD-----KW-TGCFPVKWHIVKDVPNSL-LKHIILENNENK-PVTNSRDTHEVK-----<br>LEQGLQVLKVF       |                                                                                                                                                                                                                        |
| Zm00008a020283_T01 | ZmYTHDC1A             | AK-----FFVIKSYTEDH--AHR--SIKYKVWASTASGNRKLDSS---YH-----AAKEK-----<br>-----EEHCP----IFLFFS-----VNGSGQFC-----GMADM---IGSVDFDRSV-<br>DYWQ-QN-----KW-SGQFPVKWHIIKDVPNNL-LWHIILENNDNK-PVTNSRDTHEVS-----LERPLCY----          |                                                                                                                                                                                                                        |
| GRMZM2G442195_T01  | ZmYTHDF2B             | AK-----FFVIKSYTEDH--VHR--SIKYKVWASTASGNRKLDSA---YH-----AAKEK-----<br>-----EEHCP----IFLFFS-----VNGSGQFC-----GVAEM---IGPVDFDRSV-<br>DYWQ-QD-----KW-SGQFPVKWHIIKDVPNNL-LRHIILENNDNK-PVTNSRDTQEVK-----LEQGLQMLTIF          |                                                                                                                                                                                                                        |
| GRMZM2G363789      | ZmYTHDF5B             | AK-----FFVIKSYTEDH--AHR--SIKYKVWASTASGNRKLDSS---YH-----AAKEK-----<br>-----EEHCP----IFLFFS-----VNGSGQFC-----GMADM---IGSVDFDRSV-<br>DYWQ-QN-----KW-SGQFPVKWHIIKDVPNNL-LWHIILENNDNK-PVTNSRDTHEVS-----LERPLCY              |                                                                                                                                                                                                                        |
| Musa acuminata     | GSMUA_Achr1T10560_001 | MaYTHDF5B                                                                                                                                                                                                              | GK-----FFIIKSYSEAN--VHK--SIKYGVWSSTSAGNKKLNSA---YI-----EAQKK-----<br>-----GHSSP----IFLFFS-----VNASGRFC-----GVAEM---IGPVDFEKS-<br>DYWN-KD-----KW-TGQFPVKWHIVKDVPNSFR-FRHIILENNDNK-PVTNSRDTQEVK-----LEQGLEMLSIF          |
|                    | GSMUA_Achr1T10590_001 | MaYTHDF4B                                                                                                                                                                                                              | AR-----FFIIKSYSEDN--VHK--SIKYGVWASTSNGNRKLNSA---YI-----EMREQ-----<br>-----EHSYP----IFLFFS-----VNASGHFC-----GVAEM---IGPVDFEKS-<br>DYWN-ED-----KW-TGQCPVKWHIVKDVPNTM-FRHIILEKNDNK-PVTNSRDTQEVK-----LEQGLEMLGIF           |
|                    | GSMUA_Achr1T24980_001 | MaYTHDF3C                                                                                                                                                                                                              | AR-----FFVIKSYSEDD--VHK--SIKYNVWSSTHNGNRRLDGA---YE-----DAQSK-SVG-----<br>-----RPRKCP----VFLFFS-----VNASGQFC-----GLAEM---<br>VGPVDFDKDM-NFWQ-QD-----KW-SGSFPVKWHIIKDVPNSS-LRHIILENNENK-PVTNSRDTQEIP-----<br>YSAGIDMLKIF |

|                       |                |                                                                                                                                                                                                                                             |
|-----------------------|----------------|---------------------------------------------------------------------------------------------------------------------------------------------------------------------------------------------------------------------------------------------|
| GSMUA_Achr4T04600_001 | MaYTH<br>DF1B  | AK-----FFIIKSYSEDN--VHK--SIKYGVWASTSNGNKKLDSA---YH-----EAKKK-----<br>-----EDPCP----VFLFFS-----VNASAHFC-----GVAEM---IGPVDFERSV-<br>DYWQ-QD-----KW-SGQFPLKWHMVKDVPNNL-FRHIILENNENK-PVTNSRDTQEVK-----LEQGLEMLSIF                               |
| GSMUA_Achr4T11560_001 | MaYTH<br>DF2B  | AK-----FFVIKSYSEDN--VHK--SIKYGVWASTSNGNKKLDSA---YH-----EANKK-----<br>-----EDPCP----VFLFFS-----VNASAHFC-----GVAEM---<br>IGPVDFEKSVDYWQ-QD-----KW-SGQFPVKWQIVKDVPNNL-FRHIILENNDNK-PVTNSRDTQEVK-----<br>LEQGLEMLSIF                            |
| GSMUA_Achr4T12480_001 | MaYTH<br>DF3B  | AM-----FFIIKSYSEDN--VHK--SIKYGVWASTSSGNRKLDSA---YH-----EAKQK-----<br>-----EDPCP----VFLFFS-----VNASAHFC-----GVSEM---IGPVDFEKSVDYWQ-QD-----RW-SGQFPVKWHMVKDVPNNL-FRHIILENNENK-PVTNSRDTQEVK-----LEKGLEMLGIF                                    |
| GSMUA_Achr4G14820_001 | MaYTH<br>DF7A  | AK-----LFVIKAYSEDD--IHK--SIKYNVWASTGYGNKKLDAG---YQ-----EAQGK-----<br>-----AGGCP----VLLFFS-----VNTSGQFV-----GVAEM-----<br>-----DVPNSSILKHITLENNDNK-PVTNSRDAQEVM-----LEQGLRMLKIF                                                              |
| GSMUA_Achr4T21380_001 | MaYTH<br>DF1A  | AK-----FFIIKSYSEDD--IHK--SIKYNVWASTPHGNKKLDAA---YQ-----ESKEK-T-----<br>-----SGCP----VFLFFS-----VNTSGQFV-----GVAEM---VGPVDFNKTL-DYWQ-QD-----KW-VGYFPVKWHIVKDVPNNI-LKHITLENNDNK-PVTNSRDTQEVK-----LDQGLQLLKLF                                  |
| GSMUA_Achr4T22630_001 | MaYTH<br>DF2A  | AK-----FFIIKSYSEDD--IHK--SIKYNVWASTPHGNKKLDAA---YQ-----ESKEK-T-----<br>-----NGCP----VFLFFS-----VNTSGQFV-----GVAEM---VGRVDFNKTL-DYWQ-QD-----KW-IGCFPVKWHIVKDVPNNI-LKHITLENNENK-PVTNSRDTQEVK-----LEQGLQLLKLF                                  |
| GSMUA_Achr4T28430_001 | MaYTH<br>DF4A  | AK-----FFIIKSYSEDD--IHK--SIKYNIWSSTPHGNKKLDAA---YQ-----ESKEQ-T-----<br>-----SGCP----IFLFFS-----VNTSGQFV-----GVAEM---IGRVNFNRTF-GYWQ-QD-----KW-IGCFPVKWQIVKDVPNNI-LKHIILEDNENK-PVTNSRDTQEVK-----LDQGLQLLRLF                                  |
| GSMUA_Achr5T02830_001 | MaYTH<br>DF3A  | AK-----FFIIKSYSEDD--IHK--SIKYSIWASTPHGNKKLDAG---YQ-----ESKQK-T-----<br>-----SGCP----VFLFFS-----VNTSGQFV-----GVAEM---VGQVNFNKTL-DYWQ-QD-----KW-VGCFPVKWHIVKDVPNSV-LKHITLENNDNK-PVTNSRDTQEVK-----LDQGLQLLKLF                                  |
| GSMUA_Achr6T12810_001 | MaYTH<br>DF5C  | AK-----FFMIKSYNEDD--VHK--SVKYNVWASTPNGNKKLDAV---FW-----DAERL----M-----<br>-----KKGSKCP----IFLFFS-----VNASGQFV-----GLAEM---<br>IGPVDFNKNL-DFWQ-KE-----TW-NGFFPVKWHIIKDIPNRL-FQSIRLENNDNK-<br>AVTFSKDTQEVSFSLSCIERFPIMQVLLGQQFTVIGLPQGLQMLHIF |
| GSMUA_Achr6T19820_001 | MaYTH<br>DC1Ab | SR-----YFIVKSCNREN--LEI--SVQQGVWATQRSNEPKLNEA---FE-----STEN-----<br>-----VILIFS-----INKTRHFQ-----GCAKM---TSRIGGLVGG-GNWK-YS-----HGTAH-----Y-GRNFSVKWLKCELSFNK-THHLRNPYNDNL-PVKISRDCQELE-----PFIGEQLASLL                                     |
| GSMUA_Achr6T26690_001 | MaYTH<br>DF2C  | AL-----FFVIKSYSEDD--IHK--SIKYSVWASTPNGNKRVDNA---FQ-----VAQEK-MTE-----<br>-----KGGNCP----VFLFFS-----VNASGQFC-----GVAEM---<br>TGRVDFSKNM-DFWQ-QD-----KW-NGFFPVKWHIIKDVPNLQ-FRHIILENNDNK-PVTNSRDTQEVK-----<br>FSQGIEMLSIF                      |



|                           |                       |                |                                                                                                                                                                                                                        |
|---------------------------|-----------------------|----------------|------------------------------------------------------------------------------------------------------------------------------------------------------------------------------------------------------------------------|
|                           | GSMUA_Achr7T01490_001 | MaYTH<br>DF5A  | AK-----FFIIKSYSEDD--IHK--SIKYNVWASTLHGNKKLDAA---YL-----ESKEK-T-----<br>-----SGCP----IFLFFS-----VNTSGQFV-----GVAEM---VGPVDFNCTL-<br>DFWQ-QD-----KW-IGCFPVKWHIVKDVPNSI-LKHIKVENNDNK-PVTNSRDTQEVK-----LEQGLQLLKLF         |
|                           | GSMUA_Achr7T27220_001 | MaYTH<br>DF6A  | AR-----FFVIKSYSEDD--IHK--SIKYNVWTSTPNGNKKLDGG---YQ-----EAQEK-D-----<br>-----GGCP----VFLFYS-----VNASGQFV-----GVAEM---<br>VGPVDFNKTV-DYWQ-QD-----KW-IGCFPVKWHIIKDVPNSL-LKHITLENNDNK-PVTNSRDTQEVN-----<br>LEQGLQMLKIF     |
|                           | GSMUA_Achr8T29890_001 | MaYTH<br>DF4C  | AK-----FFVIKSYSEDD--VHK--SIKYNVWSSTPNGNKRLNSA---YE-----DAQRK-SAG-----<br>-----KSRKCP----VFLFYS-----VNASGQFC-----GLAEM---<br>VGPVDFDQDM-DFWQ-QD-----KW-SGSFPVKWHVIKDVSNAS-LRHIILENNENK-PVTNSRDTQEIP-----<br>YSTGINMLSIF |
|                           | GSMUA_Achr9T06180_001 | MaYTH<br>DF1C  | AL-----FFVIKSYSEDD--IHK--SIKYNVWASTPNGNKRLDNA---FQ-----VAQEK-MAE-----<br>-----KNSKCP----VFLFFS-----VNASGQFC-----GVAEM---<br>TGRVDFSKDM-DFWQ-QD-----KW-NGFFPVKWHIIKDVPNPQ-FRHIILENNDNK-PVTNSRDTQEVK-----<br>FSQGTEMLSIF |
|                           | GSMUA_Achr9T30440_001 | MaYTH<br>DC1Aa | SRCLSCMNAVLSIMYFIVKSCNREN--LEI--SVQQGMWATQRSNEAKLNEA--FE-----STEN-----<br>-----VILIFS-----INKTRHFQ-----GCGKM---<br>TSRIGGFVGG-GNWK-YS-----HGTAH-----Y-GRNFSVKWLKLCESFNK-THHLRNPYNDNL-PVKISRDCQELE-----<br>PFIGEQLASLL  |
| <i>Vitis<br/>vinifera</i> | GSVIVT01010494001     | VvYTH<br>DF2B  | AF-----FFVIKSYSEDD--IHK--SIKYNVWASTPNGNKRLDGA---YQ-----EAKER-MGD-----<br>-----RGSKCP----VFLFFS-----VNASGQFC-----GVAEM---<br>IGRVDFNKNM-DFWQ-QD-----KW-NGFFPVKWHIIKDVPNPQ-LRHIILENNDNK-PVTNSRDTQEVN-----FPQGIEILNIF     |
|                           | GSVIVT01017649001     | VvYTH<br>DF1C  | AK-----FFIIKSYSEDD--VHK--SIKYNMWASTANGNKKLDAA---YQ-----EAQGK-S-----<br>-----GSCP----IFLLFS-----VNASGQFV-----GVAEM---<br>VGSVDFNRS�-EYWQ-QD-----KW-TGCFPVKWHVIKDIPNSL-LKHITLENNENK-PVTNSRDTQEVK-----<br>FEQGIQVLKIF     |
|                           | GSVIVT01019895001     | VvYTH<br>DC1B  | AK-----FFIIKSYSEDN--VHR--SIKYSVWASTALGNRKLDAA---YQ-----KAKEI-----<br>-----ETNCP----IFLCFS-----VNASSQFC-----GVAEM---VGPVNFEKDA-<br>EYWQ-QD-----RW-SGLFPVKWHIIKDVPNSL-FRHILLENNENK-PVTHSRDTQEVN-----LEQGIEMLKIF          |
|                           | GSVIVG01021617001     | VvYTH<br>DC1A  | AK-----FFIIKSYSEDN--VHK--SIKYGVWASTPNGNRKLDAA---YR-----EAKEK-----<br>-----QAACP----VFLLFS-----VNASAQFC-----GVAEM---<br>VGPVDFDKSV-DYWQ-QD-----KW-SGQFPVKWHIIKDVPNSQ-FRHIVLENNDNK-PVTNSRDTQEVK-----<br>LEQGIEILNIF      |
|                           | GSVIVT01023248001     | VvYTH<br>DF3C  | AK-----FFIIKSYSEDD--VHK--SIKYNVWASTPNGNKKLDAA---YR-----EAQEK-S-----<br>-----AGCP----VFLFFS-----VNTSGQFV-----GLAEM---<br>VGHVDFHKNV-EYWQ-QD-----KW-NGCFSVKWHVVKDVPNSL-LKHITLENNENK-PVTNSRDTQEVK-----<br>LEQGLQMLKIF     |

|                              |                   |               |                                                                                                                                                                                                                        |
|------------------------------|-------------------|---------------|------------------------------------------------------------------------------------------------------------------------------------------------------------------------------------------------------------------------|
|                              | GSVIVT01025494001 | VvYTH<br>DF1A | AK-----FYVIKSFSEDD--IHK--CIKYDVWASTPNGNKKLDAA---FH-----DAEAK-ANE-----<br>-----TGTKFP----IFLFFS-----VNGSGQFV-----GVAEM---<br>VGQVDFNKM-DFWQ-LD-----KW-NGFFPVKWHIVKDIPNSQ-LRHITLESNENR-SVTYTRDTQEIG-----<br>LKQGVEMLKIF  |
|                              | GSVIVT01029460001 | VvYTH<br>DF1B | SR-----YFIVKSCNREN--LEL--SVQQGVWATQRSNEAKLNEA---FD-----SVEN-----<br>-----VILIFS-----VNRTRHFQ-----GCAKM---TSKIGGFVGG-<br>GNWK-YA-----HGTAH-----Y-GRNFSVKWLKLCELSFHK-TRHLRNPYNENL-PVKISRDCQELE-----PSIGEQLASLL           |
|                              | GSVIVT01032236001 | VvYTH<br>DF3B | TR-----YFIIKSLNHHN--IQL--SMEKGIWATQVMNEPILEEA---FH-----NSGK-----<br>-----VILIFS-----VNMSGFFQ-----GYAQM---MSSVGWRRD--<br>NVWS-QG-----SGGNN-----PW-GRSFKVKWLRHLDPFQK-TLHLKNPLNDYK-PVKISRDCQELS-----QEIGEALCELL           |
|                              | GSVIVT01033395001 | VvYTH<br>DF2A | AK-----FFVIKSYSEDD--VHK--SIKYNVWSSTPNGNKKLENA---YE-----DAQRI-ALG-----<br>-----KRRGCP----IFLFFS-----VNASGQFC-----GVAEM---<br>IGPVDFHKDM-DFWQ-QD-----KW-SGSFPVKWHIIKDVPNTN-FRHIILENNENK-PVTNSRDTQEIR-----<br>FKQGLEMLKIF |
|                              | GSVIVT01036696001 | VvYTH<br>DF2C | AK-----FFVIKSYSEDN--VHK--SIKYGVWVSTPNGNKRLNSA---FH-----EAKEK-----<br>-----HGNCP----IFLLFS-----VNASAQFC-----GVAEM---<br>VGPVDYDKSV-DYWK-QD-----KW-TGQFPVKWHIIKDVPNSQ-FRHIILENNDNK-PVTNSRDTQEVE-----<br>LEQGNEMLNIF      |
| <i>Manihot<br/>esculenta</i> | Manes.02G029400.1 | MeYTH<br>DC1B | AF-----FFVIKSYSEDD--IHK--SIKYNVWASTPNGNKRLDSA---YQ-----DAQKK-IAE-----<br>-----KGSNCP----VFLFFS-----VNASGQFC-----GVAEM---<br>IGQVDFNKNM-DFWQ-QD-----KW-NGYFPVKWHIIKDVPNPQ-LRHIILENNENK-PVTNSRDTQEVK-----<br>FPQGMEMLNVF |
|                              | Manes.06G172700.1 | MeYTH<br>DF3A | AK-----FFVIKSYSEDD--VHK--SIKYNVWSSTPNGNKKLQSA---YD-----DAQKI-AAG-----<br>-----DAKACP----IFLFFS-----VNASGQFC-----GVAEM---<br>IGPVDFAKDM-DFWQ-QD-----KW-SGSFPVKWHIIKDVPNSS-FRHIILENNENK-PVTNSRDTQEIM-----<br>YKQGLEMLKIF |
|                              | Manes.07G024100.1 | MeYTH<br>DF3C | SR-----YFIVKSCNREN--LEL--SVQQGVWATQRSNEAKLNEA---FD-----SAEN-----<br>-----VILIFS-----VNRTRHFQ-----GCAKM---TSKIGASAVG-<br>GNWK-YA-----HGTAH-----Y-GRNFSVKWLKLCELSFHK-TRHLRNPYNENL-PVKISRDCQELE-----PSIGEQLASLL           |
|                              | Manes.07G081200.1 | MeYTH<br>DF2A | AK-----FFVIKSYSEDD--VHK--SIKYNVWASTPNGNKKLDAG---YQ-----EAQQK-S-----<br>-----GGCP----VFLFFS-----VNTSGQFV-----GLAEM---<br>IGPVDFHKNV-EYWQ-QD-----KW-TGCFPLKWHIVKDVPNSL-LKHITLENNENK-PVTNSRDTQEVK-----<br>MEQGLKMIKIF     |
|                              | Manes.09G141700.1 | MeYTH<br>DF5A | AK-----FFIIKSYSEDN--VHK--SIKYGVWASTPNGNRRLDAA---YS-----EAKEK-----<br>-----QVPCP----VFLFFS-----VNASAQFC-----GVAEM---<br>VGPVDFDKSV-DYWQ-QD-----KW-SGQFPVKWHIAKDVPNSQ-FRHIVLENNDNK-PVTNSRDTQEVK-----<br>LEQGIEMLNIF      |

|                                                              |                   |                |                                                                                                                                                                                                                       |
|--------------------------------------------------------------|-------------------|----------------|-----------------------------------------------------------------------------------------------------------------------------------------------------------------------------------------------------------------------|
|                                                              | Manes.10G067800.1 | MeYTH<br>DF4A  | AK-----FFVIKSYSEDN--VHK--SIKYGVWASTPNGNKKLDAA---YH-----EAKEK-----<br>-----TGTSP----IFLLFS-----VNASAQFC-----GVAEM---<br>VGAVDFDKSV-DYWQ-QD-----KW-SGQFPVKWHIIKDVPNSQ-FRHIVLENNDNK-PVTNSRDTQEVE-----<br>LEHGVEMLKIF     |
|                                                              | Manes.12G010500.1 | MeYTH<br>DF3B  | AK-----FFVIKSYSEDN--VHK--SIKYGVWASTLNGNKKLDGA---YH-----EAKER-----<br>-----HGTSP----VFLIFS-----VNASAQFC-----GVAEM---<br>VGPVDFDKSV-DYWQ-QD-----KW-SGQFPVKWHIIKDVPNSQ-FRHIVLENNDNK-PVTNSRDTQEVE-----<br>LEHGVEMLKIL     |
|                                                              | Manes.13G011300.1 | MeYTH<br>DF2B  | AK-----IFVIKSYSEDD--VHK--SIKYNVWASTPNGNKKLDAA---YQ-----EAQQK-S-----<br>-----SGCP----VFLFFS-----VNTSGQFV-----GLAEM---<br>VGPVDFHKNV-EYWQ-QD-----KW-TGCFPLKWHIVKDIPNSL-LKHITLENNENK-PVTNSRDTQEVK-----<br>LEQGLKMFKIF    |
|                                                              | Manes.14G000200.1 | MeYTH<br>DF1B  | AK-----FFIIKSYSEDD--VHK--CIKYGVWASTPNGNKKLDAA---YH-----EAKET-P-----<br>-----GSCP----VFLIFS-----VNASGQFV-----GLAEM--IGAVDFNKTV-<br>GYWQ-QE-----KW-IGCFPVKWHFIKDVPNSS-LRHITLENNENK-PVTNSRDTQEVN-----LDKGIQILKIF         |
|                                                              | Manes.14G012900.1 | MeYTH<br>DF1A  | AK-----FFVIKSYSEDD--VHK--SIKYNVWASTPNGNKKLDAA---YQ-----EAQQK-S-----<br>-----CGCP----MFLFFS-----VNTSGQFV-----GLAEM---<br>VGPVDFHKNV-EYWQ-QD-----KW-TGCFPLKWHIVKDIPNSL-LKHITLENNENK-PVTNSRDTQEVK-----<br>LEQGLKMVKIF    |
|                                                              | Manes.14G122500.1 | MeYTH<br>DC1A  | AK-----FYVIKSYNEDD--IHK--SIKYDVWASTPNGNKKLDAA--FR-----DAEQR-SDE-----<br>-----TGSKCP----IFLFFS-----VNGSGQFV-----GIAEM---<br>VGQVDFDKDM-DFWQ-LD-----KW-NGFFPVKWHVIKDIPNSH-LRHIILENNERR-PVTFSRDTQEIG-----<br>LKQGLEMLNIF |
|                                                              | Manes.15G003300.1 | MeYTH<br>DF1C  | AK-----FFVIKSYSEDD--VHK--SIKYNVWASTPNGNKKLDAA---YQ-----EAQQK-P-----<br>-----GGCP----VYLFFS-----VNTSGQFV-----GLAEM---<br>VGPVDFHKNV-EYWQ-QD-----KW-TGCFPLKWHIVKDIPNSL-LKHITLENNENK-PVTNSRDTQEVK-----<br>LEQGLKMIKIF    |
|                                                              | Manes.16G048600.1 | MeYTH<br>DF2C  | TR-----YFIIKSLNHHN--IQL--SVEKGVWATQVMNEPILEEA--FH-----NSGK-----<br>-----VILIFS-----VNMSGFFQ-----GYAQM--ISSVGWRRD--<br>NIWS-QG-----CGKSN-----PW-GRSFKVKWLRLNDLPFQK-TLHLKNPLNDYK-PVKISRDCQELP-----EDVGEALCDLI           |
|                                                              | OAY33214          | MeYTH<br>DF4B  | AR-----FFIIKSFSEDN--VHK--SIKYSVWASTPHGNKKLDVA---YR-----EAKES-----<br>-----GSNCP----VFLIFS-----VNASGQFC-----GVAQM---<br>VGPVNFEKDA-DYWQ-QD-----RW-SGQFPVQWHIIKDVPNSR-FRHILLKNNDNK-PVTHSRDAQEVK-----<br>LEQGIEMLKIF     |
| <i>Marchanti</i><br><i>a</i><br><i>polymorph</i><br><i>a</i> | Mapoly0007s0039.1 | MpoYT<br>HDC1B | AK-----FFVIKSYSEDD--VHK--SIKYNVWASTPNGNKRLEGA---YQ-----DAQTR-----<br>-----Q-GPCP----VFFFFS-----VNASGQFC-----GVAEM---<br>TGPVDFNKSV-DYWQ-QD-----KW-NGRFPVKWHIIKDIPNCQ-FRHIILENNNDNK-PVTNSRDTQEVK-----<br>FEQGVEMLNIF   |

|                                |                   |                |                                                                                                                                                                                                                         |
|--------------------------------|-------------------|----------------|-------------------------------------------------------------------------------------------------------------------------------------------------------------------------------------------------------------------------|
|                                | Mapoly0056s0030.1 | MpoYT<br>HDC1A | CR-----FFIVKSSNREN--LEL--SVERGLWATHRNNESKLNEA---YD-----SCDH-----<br>-----VILIFS-----VNETRHFQ-----GCARM---MSKIGGVAGG-<br>GGWK-YA-----HGTAH-----Y-GRNFRLKWLKLCELSFNK-TRHLRNPFNENL-PVKISRDCQELE-----PGVGEQLAQLL            |
|                                | Mapoly0103s0072.1 | MpoYT<br>HDF1  | TR-----YFIIKSLNHHN--IAK--SIENGIWATQAMNEPVLNEA---YE-----SSER-----<br>-----VLLVFS-----VNMSGHFQ-----GYAQM---ASPIGRRRA--<br>NVWT-EG-----NEGTN-----PW-GGSFRVEWLRRLHDLPFQK-TVHLKNPLNFHK-PVKISRDCQELT-----LEIGDALCALI          |
| <i>Medicago<br/>truncatula</i> | Medtr2g005840.1   | MtYTH<br>DF4C  | DEFAFTVCRDQYNLPDFQTKYETAKFYMIKSFNEDDIHKGIKYDVWTSTPHGNKKLNAAFQNAEAKLSQTGTQCPIFLFFSVNASGQFVGVAEMLGPVDFKKD<br>MKFWKLDKYNGFFPIKWHIIKDVPNRQFAHITLQINENKCVTFSRDTQEITLKEGLEMLKIFKSYPAKTSLDDDFDYENREKLCRSQRTEHTGW               |
|                                | Medtr2g029540     | MtYTH<br>DC1A  | AK-----FFVIKSYSEDD--IHK--SIKYNVWASTQNGNKKLDAA---YQ-----EAQQK-S-----<br>-----GGCP----IFLLFS-----VNTSGQFV-----GLAEM---TGPVDFNKS-<br>EYWQ-QD-----KW-MGCFPLKWHIVKDVPNNV-LRHITLENNENK-PVTNSRDTQEIM-----LEPGLKLLKIF           |
|                                | Medtr2g032660     | MtYTH<br>DF3C  | AK-----FFIIKSYSEDD--VHK--SIKYSVWASTPNGNKKLDAA---YQ-----EA-----<br>-----GGCP----IFLLFS-----VNTSGQFV-----GLAEM---TGPVDFDKTV-<br>EYWQ-QD-----RW-TGCFNVKWHIIKDIPNGV-LRHITLENNENK-PVTNSRDTQEVK-----FEKGVQIVKIF               |
|                                | Medtr2g063460     | MtYTH<br>DF2C  | AK-----FFVIKSYSEDD--IHK--SMKYNVWTSTPNGNKKLDAA---YL-----EAKEK-S-----<br>-----ADCP----IFLLFS-----VNTSGQFV-----GLAEM---VSPVDFDRTV-<br>EYWQ-QD-----RW-TGCFSVKWRIIKDIPNNV-LRHITLENNENK-PVTNSRDTQEVK-----FEKGVEILKIF          |
|                                | Medtr4g005110     | MtYTH<br>DF1B  | AK-----FFVIKSYSEDD--VHK--SIKYNVWSSTPHGNKKLQSA---YE-----DARRK-ATG-----<br>-----KSGGCP----IFLFFS-----VNASGQFC-----GVAEM---<br>VGPVDFNKDM-DFWQ-QD-----KW-SGSFPVKWHIIKDVPNGN-FRHIILENNEFK-PVTNSRDTQEIM-----<br>YRKGLEMLKIF  |
|                                | Medtr4g123630     | MtYTH<br>DF1C  | AK-----FFVIKSYSEDN--VHK--SIKYGVWASTPNGNRKLDAA---YC-----QAKEK-----<br>-----QDACR----IFLFFS-----VNASAQFC-----GVAEM---<br>VGPVNFDKSV-DFWQ-QD-----KW-SGQFPVKWHIIKDVPNSQ-FRHIVLENNDNK-PVTNSRDTQEVK-----<br>LQQGIEMLTIF       |
|                                | Medtr6g032970     | MtYTH<br>DF3A  | AL-----FFVIKSYSEDD--VHK--SIKYDVWASTPNGNKRLDNA---FQ-----DAQNR-MEE-----<br>-----KGSKCP----VFLFFS-----VNASGQFC-----GVAEM---<br>IGRVDFNKSM-DFWQ-QD-----KW-NGYFPVKWHIIKDIPNPQ-LRHIILENNDHK-PVTNSRDTQEIH-----FPQGIEMLNIF      |
|                                | Medtr7g085500     | MtYTH<br>DF2A  | AK-----FFVIKSYSEDD--VHK--SIKYNVWSSTVHGNRKLGN---YE-----DTKKV-SAE-----<br>-----KSGVCP----IFLFFS-----VNASGQFC-----GVAEM---<br>IGSVDFNKDM-DFWQ-QD-----KW-SGSFPVKWHIIKDVPNPN-FRHIILDNNENK-PVTNSRDTQEIM-----YSKGLEMLKIF       |
|                                | Medtr8g088390     | MtYTH<br>DF1A  | NRTSTPLPQGIS-RYFIVKSCNREN--LEL--SVQQGVWATQRSNESKLNEA---FD-----SVEN-----<br>-----VILIFS-----VNRTRHFQ-----GCAKM---<br>TSRIGGSVAG-GNWK-YA-----HGTAH-----Y-GRNFSVKWLKLCELSFHK-TRHLRNPYNEN-LPVKISRDCQELE-----<br>PSIGEQLASLL |
| <i>Mimulus<br/>guttatus</i>    | Migut.A00893.1    | MgYTH<br>DC1B  | AK-----FFVIKSYSEDD--VHK--SIKYNVWSSTPNGNKKLTTA---YQ-----DAHRT-TLG-----<br>-----DLRGCP----IFLFFS-----VNASGQFC-----GVAEM---<br>TGPVDFHRDM-DFWQ-QD-----KW-SGSFPVKWHIIKDLPNSN-FRHIILENNENK-PVTNSRDTQEIC-----YEKGLEMLRIY      |

|                     |                |                |                                                                                                                                                                                                                       |
|---------------------|----------------|----------------|-----------------------------------------------------------------------------------------------------------------------------------------------------------------------------------------------------------------------|
|                     | Migut.B00769.1 | MgYTH<br>DF4C  | AK-----FYVIKSYSEDD--VHK--CIKYDVWSSTPNGNQKLDAA--FS-----EAGAK-TRE-----<br>-----TGVNCP----VFLFFS-----VNGSGQFV-----GVAEM---<br>IGQVDFSKNM-DFWQ-LD-----KW-NGFFPIKWHMIKDVPNTL-LRHIILENNENR-PVTYSRDTQEIG-----LKQGLEMLRIF     |
|                     | Migut.D02575.1 | MgYTH<br>DF2A  | AR-----FFIIKSYSEDD--VHK--SIKYNVWASTPNGNKKLDAA---YQ-----DAQQR-P-----<br>-----GGCP----VFLFFS-----VNTSGQFV-----GVAEM---<br>TGPVDFNKNV-EYWQ-QD-----KW-VGCFPVKWHIVKDLPNSL-LKHITLENNENK-PVTNSRDTQEVK-----<br>LDQGLQVLKIF    |
|                     | Migut.G00015.1 | MgYTH<br>DF2C  | SR-----YFVVKSCNNEN--LEL--SVQQGVWATQRSNEAKLNEA--FE-----SVDN-----<br>-----IILIFS-----VNKTRHFQ-----GCAKM---TSRIGGSISG-<br>GNWK-NA-----HGTAH-----Y-GQNFSVKWLKLGELSFNK-TRHLRNPFNENL-PVKISRDCQELE-----PSIGEQLASLL           |
|                     | Migut.H01337.1 | MgYTH<br>DC1Aa | AK-----FFVIKSFSEDN--IHK--SIKYSVWASTPLGNRKLDAA---YC-----ETKEM-----<br>-----EGICP----VLLFS-----VNASGQFC-----GVAEM---IGPVDFENDA-<br>DYWQ-QD-----RW-SGQFPVKWHIIKDVPNSR-FRHILLENNENK-PVTHSRDSQEVK-----LEQGIEMLQIF          |
|                     | Migut.J00855.1 | MgYTH<br>DF1B  | SR-----YFVVKSCNREN--LEL--SVQQGVWATQRSNEAKLNEA--FE-----SVEN-----<br>-----IILIFS-----VNKTRHFQ-----GCAKM---TSRIGGSVGG-<br>GNWK-HA-----HGTAH-----Y-GRNFALKWLKLCELTFDK-TRHLRNPYNENL-PVKISRDCQELE-----PSIGEQLASLL           |
|                     | Migut.M01886.1 | MgYTH<br>DC1Ab | AK-----FFVIKSYSEDD--VHK--SIKYNVWSSTPNGNKKLTTA---YQ-----DAHRT-GLG-----<br>-----DLRGCP----IFLFFS-----VNASGQFC-----GVAEM---<br>TGPVDFHRDM-DFWQ-QD-----KW-SGSFPVKWHIIKDLPNSN-FRHIILENNENK-PVTNSRDTQEIC-----YKKGLEMLRIY    |
|                     | Migut.N00538.1 | MgYTH<br>DF1A  | AK-----FFIIKSYSEDD--VHK--SIKYNIWASTSNGNKKLEAA---YQ-----DAQQK-P-----<br>-----GGCP----VFLFFS-----VNTSGQFV-----GVAEM---<br>VGPVDFNKNV-EYWQ-QD-----KW-IGCFPLKWHIVKDLPNSS-LKHITLENNENK-PVTNSRDTQEVK-----<br>LEPGLAVLKIF    |
|                     | Migut.N00839.1 | MgYTH<br>DF3C  | AK-----FYVIKSYSEDD--VHK--CIKYDVWSSTPNGNQKLDAA--FS-----EAGAK-TRE-----<br>-----TGVNCP----VFLFFS-----VNGSGQFV-----GVAEM---<br>IGQVDFSKNM-DFWQ-LD-----KW-NGFFPIKWHMIKDVPNTL-LRHIILENNENR-PVTYSRDTQEIG-----LKQGLEMLRIF     |
|                     | Migut.O00389.1 | MgYTH<br>DF1C  | TR-----YFIIKSLNHEN--IQL--SVKKEIWATQVMNEPILEEA--FQ-----NSGK-----<br>-----VILIFS-----VNMSGFFQ-----GYAQM---MSSVGWRRD--TIWS-<br>QA-----SGKSN-----PW-GRSFKVKWLRLNDLAFQK-TLHLKNPWNDFK-PVKISRDCQELP-----GDIGRALCELL          |
| <i>Oryza sativa</i> | Os01g22630     | OsYTH<br>DF3C  | AK-----FFVIKSIGEDD--VHK--SIKYGVSSSSSGNSKLDIA--FK-----DANRI-AKR-----<br>-----NSTKCP----VFLFFS-----VNGSGLFC-----GMAEM---<br>VGPVDFHKDM-DFWC-QD-----KW-TGSFPVRWHIVKDVPNYT-LQHILLQNNENK-PVTHSRDTQEIP-----<br>YVPGISMLKIL  |
|                     | Os01g48790     | OsYTH<br>DF1C  | AL-----FFVIKSYSEDD--IHK--SIKYNVWASTPNGNKRLDNA--FK-----LAQER-VAE-----<br>-----KGTKCP----MFLFFS-----VNASGQFC-----GVAEM---<br>VGPVDFNRNM-NFWQ-QD-----KW-NGFFPVKWHIIKDVPNPQ-FRHIILENNENK-PVTNSRDTQEVK-----<br>FPQGSEMLNIF |

|                           |              |               |                                                                                                                                                                                                                        |
|---------------------------|--------------|---------------|------------------------------------------------------------------------------------------------------------------------------------------------------------------------------------------------------------------------|
|                           | Os03g06240   | OsYTH<br>DF1A | AK-----FFVIKSYSEDD--IHK--SIKYNVWASTTNGNKKLDAA---YQ-----EAQAK-S-----<br>-----SKCP----IFLFFS-----VNTSGQFV-----GVAEM--TGAVDFECTL-<br>EYWQ-QD-----KW-NGSLSLKWHIVKDVPNNI-LKHIILENNENK-PVTNSRDTQEVN-----LDQGIQMLKIF          |
|                           | Os03g20180   | OsYTH<br>DF2C | AK-----FFVIKSYSEDD--VHK--SIKYNVWSSTPNGNKRLDAA---YS-----DVQGR-ALG-----<br>-----K---CP----IFLFFS-----VNASGQFC-----GVAEM---<br>VGPVDFHKDM-DFWQ-QD-----KW-SGSFPVKWHLVKDVPNST-FRHIILENNENK-PVTNSRDTQEIP-----<br>FKSGTNMLKLF |
|                           | Os03g53670   | OsYTH<br>DF2A | AK-----FFVIKSYSEDD--VHK--SIKYNVWASTPNGNKKLDAG---YR-----EAQEK-S-----<br>-----SECP----VFLFFS-----VNTSGQFV-----GVAEM---<br>VGPVDFEKTV-DYWQ-QD-----KW-NGCFPIKWHVVKDVPNNI-LKHITLDNNDNK-PVTNSRDTQEVK-----<br>LEQGLEMLKIF     |
|                           | Os04g04000   | OsYTH<br>DF5C | AK-----FFMIKSYSEDD--IHK--GIKYNVWASTPHGNNKLDAA---FR-----EAQIL-IKE-----<br>-----KGKKCP----VFLFFS-----VNSSGQFV-----GLAEI---<br>LGPVDFKKTМ-DFWK-LD-----RW-NGFFPVTWHIIKDIPNRL-FKHITLENNDNR-IVTFSRDTQEIG-----LLQGLKMLKIF     |
|                           | Os04g51940   | OsYTH<br>DF3B | AK-----FFVIKSYTEDH--VHK--SIKYGVWASTASGNRKLDAA---YR-----EAKEK-----<br>-----EATCP----IFLFFS-----VNGSGQFC-----GVAEM---<br>IGPVDFDKSV-DYWQ-QD-----KW-SGQFPVKWHIIKDVPNSL-LRHIILENNENK-PVTNSRDTQEVР-----LDHGLQMLTIF          |
|                           | Os05g01520   | OsYTH<br>DF4C | AK-----FFMIKSYSEDD--VHK--GIKYNVWASTPNGNNKLDAA---FH-----EAQIL-MKE-----<br>-----QGKRCР----IFLFFS-----VNTSGQFV-----GLAEM---<br>LGPVDFKKTМ-DFWQ-QD-----KW-NGFFPVMWHIIKDIPNRF-FKHITLENNEGK-VVTFSRDTQEIG-----LPQGLEMLKIF     |
|                           | Os06g46400   | OsYTH<br>DC1A | SR-----YFIVKSCNREN--LEI--SVQQGIWATQRSNEAKLNEA---FE-----SIEN-----<br>-----VILIFS-----INRTRNFQ-----GCAKM---TSRIGGYIGG-GNWK-<br>SA-----HGTАH-----Y-GRNFSIQWLKLCELSFQK-THHLRNPYNDNL-PVKISRDCQELE-----PFIGEQLASLL           |
|                           | Os07g07490   | OsYTH<br>DF3A | AK-----FFIIKSYSEDD--VHK--SIKYNVWASTSNGNKKLDAA---YQ-----EAKEK-S-----<br>-----SDSS----VFLIFS-----VNASGQFV-----GLAEM---<br>VGRVDFNKTЛ-EHWQ-QD-----KW-TGCFPVKWHIVKDVPNSL-LKHIILENNENK-PVTNCRDTHEVK-----<br>LEPGLQVLKIF     |
|                           | Os08g12760   | OsYTH<br>DF2B | AK-----FFVIKSYTEDH--VHR--SIKYNVWASTASGNRKLDSA---YR-----LAKEK-----<br>-----EDYCP----IFLFFS-----VNGSGQFC-----GVAEM---IGPVDFDKSV-<br>DYWQ-QD-----KW-SGQFPVKWHIIKDVPNNL-LRHIILENNDNK-PVTNSRDTQEVK-----LEHGLQMLTIF          |
|                           | Os08g44200   | OsYTH<br>DF1B | AR-----FFIIKSYSEDN--VHK--SIKYGVWASTTNGNKKLDSA---YR-----EAKEK-----<br>-----EEHCP----IFLLFS-----VNASAQFC-----GVAEM---IGPVDFEКСV-<br>DYWQ-QD-----KW-TGQFPVKWHIVKDVPNNL-FRHIILENNDNK-PVTNSRDTQEVK-----LEQGMEMLKIF          |
| <i>Panicum<br/>hallii</i> | Pahal.B00424 | PhYTH<br>DF2A | AK-----FFVIKSYSEDD--VHK--SIKYNVWASTPNGNKKLDAG---YR-----EAQEK-S-----<br>-----SDCP----VFLFFS-----VNTSGQFV-----GVAEM---<br>VGPVDFDKTV-EYWQ-QD-----KW-NGCFPLKWHIVKDVPNNI-LKHITLDNNDNK-PVTNSRDTQEVK-----<br>LEQGLEMLKIF     |

|              |               |                                                                                                                                                                                                                        |
|--------------|---------------|------------------------------------------------------------------------------------------------------------------------------------------------------------------------------------------------------------------------|
| Pahal.C00997 | PhYTH<br>DF4C | AK-----FFIIKSYSEDD--VHK--SIKYNVWASTPSGNKKLDAA---YL-----EAKEK-S-----<br>-----SSSP----VLLFS-----VNTSGQFV-----GLAEM--VGRVDFSKTV-<br>EYWQ-QD-----KW-TGCFAVKWHIVKDIPNSL-LKHIILEYNENK-PVTNSRDTQEVK-----LDQGLQMLKIF           |
| Pahal.C01447 | PhYTH<br>DF3C | AK-----FFVIKSYSEDD--IHK--SIKYNVWASTTNGNKKLDAA---YQ-----EAQSK-G-----<br>-----SACP----IFLFFS-----VNTSGQFV-----GVAEM--TGAVDFECTL-<br>EYWQ-QD-----KW-NGSFSVKWHIVKDVNNM-LKHIILENNENK-PVTNSRDTQEIH-----LEQGLQMLKIF           |
| Pahal.D00506 | PhYTH<br>DC1A | AK-----FFVIKSIGEAD--VHK--SIKYGVWSSSSNGNSKLDSA---FR-----DADRI-SRR-----<br>-----NSTKCP----VFLFFS-----VNGSGHFC-----GMAEM---<br>VGPVDFHKDM-DFWC-QD-----KW-TGCFPVRWHIVKDIPNYF-LQHITLQNNENK-PVTHSRDTQEIP-----YIPGMSVLKIF     |
| Pahal.E02120 | PhYTH<br>DF1C | AK-----FFVIKSYTEDH--VHK--SIKYNVWASTASGNRKLNTA---YR-----EAKDK-----<br>-----EEYCP----IFLFFS-----VNGSGQFC-----GVAEM---<br>IGPVDFDKNV-DYWQ-ND-----RW-SGQFPVKWHIVKDVNNI-VRHIILENNEDK-RVTNSRDTQEVK-----<br>LELGVQMLAIF       |
| Pahal.F00398 | PhYTH<br>DF1B | AK-----FFVIKSYTEDH--VHR--SIKYSVWASTASGNRKLDSA---YR-----AAKEK-----<br>-----EEHCP----IFLFFS-----VNGSGQFC-----GVAEM--IGPVDFDRSV-<br>DYWQ-QD-----KW-SGQFPVKWHIIKDVNNL-LRHIILENNDNK-PVTNSRDTQEVK-----LEQGLQMLTIF            |
| Pahal.F01360 | PhYTH<br>DF2B | AR-----FFIIKSYSEDN--VHK--SVKYGVWASTTNGNKKLDSA---YR-----EAKEK-----<br>-----EEHCP----IFLLFS-----VNASAQFC-----GVAEM--IGPVDFEKS-<br>DYWQ-QD-----KW-TGQFPVKWHIVKDVNNL-FRHIILENNDNK-PVTNSRDTQEVK-----LEQGLEMLKIF             |
| Pahal.G02347 | PhYTH<br>DF3B | AL-----FFVIKSYSEDD--IHK--SIKYNVWASTPNGNKRLDNA---YR-----LAQER-MAE-----<br>-----KGTKCP----VFLFFS-----VNASGQFC-----GVAEM---<br>VGPVDFNRNM-NFWQ-QD-----KW-NGFFSVKWHIIKDVNPQ-FRHIILENNENK-PVTNSRDTQEVK-----<br>FLQGTEMLNIF  |
| Pahal.H01140 | PhYTH<br>DF2C | SR-----YFIVKSCNREN--LEI--SVQQGIWATQRSNEAKLNEA---FE-----STEN-----<br>-----VILIFS-----INRTRHFQ-----GCAKM--TSRIGGYIGG-GNWK-<br>SA-----HGTAH-----Y-GRNFSMQWLKLCESFQK-THHLRNPYNDNL-PVKISRDCQELE-----PFIGEQLASLL             |
| Pahal.I00478 | PhYTH<br>DF1A | AK-----FFVIKSYDESD--VHK--SIKYGVWSTSSAGNQKLDTA---FR-----EAQAI-ASS-----<br>-----TSTLCP----VLLFFS-----VNGSSNFC-----GVAEM---<br>VGPVDYQNDM-DFWC-KD-----KW-TGSFPVKWHIIKNVRNYT-FRSILLQNNEYK-PVTSSRDTQEIH-----<br>YTPGTTMLELF |
| Pahal.I01354 | PhYTH<br>DF4A | AK-----FFMIKSYSEDD--IHK--GIKYNVWASTANGNDKLDAA---YH-----EAQIL-MKE-----<br>-----NGENCP----VFLFFS-----VNTSGQFV-----GLAEM---<br>LGPVDFKKT-DFWK-ED-----KW-NGFFPIIWHIIKDIPNRL-FRHIILEHNDNR-PVTFSRDTQEIG-----LAQGMQMLKIF      |
| Pahal.I01743 | PhYTH<br>DF3A | AK-----FFIIKSYSEDD--VHK--SIKYNVWASTPNGNKKLDAA---YQ-----EAKEK-S-----<br>-----SESP----VLLFS-----VNASGQFV-----GLAEM---<br>VGRVDFNKT-ehwq-QD-----KW-TGCFPVKWHIVKDVNSL-LKHIILENNENK-PVTNSRDTHEVK-----<br>LEQGLQVLKIF        |

|                            |                    |             |                                                                                                                                                                                                                        |
|----------------------------|--------------------|-------------|------------------------------------------------------------------------------------------------------------------------------------------------------------------------------------------------------------------------|
| <i>Populus trichocarpa</i> | Potri.001G002000.1 | PtYTH DF2A  | AK-----FFVIKSFSEDD--VHK--SIKYSVWTSTPNGNKKLDAA---YK-----QGKEN-P-----<br>-----GDCP----VLLFS-----VNTSGQFV-----GLAEM---<br>VGPVDFNKTV-EYWQ-QD-----KW-TGCFPLKWHIIKDVPNGC-LRHITLENNENK-PVTNSRDTQEVI-----FEKGVQILKIF          |
|                            | Potri.001G056100.1 | PtYTH DF5B  | AK-----FFIIKSFSEDN--VHK--SIKYSIWASTPHGNKKIDAA---YR-----EAKEK-----<br>-----EGNCP----VLLFS-----VNASGQFC-----GVAEM---VGPVDFEKDA-<br>DYWQ-QD-----RW-NGQFPVQWHIIKDVPNSR-FRHILLENNDHK-PVTHSRDSQEVK-----LEQGIEMLKIF           |
|                            | Potri.001G113500.1 | PtYTH DC1B  | AK-----FFIIKSYSEDN--VHK--SIKYGVWASTPNGNRKLDTA---YH-----EAKDK-----<br>-----QDPCP----VLLFS-----VNASAQFC-----GVAEM---<br>VGPVDFDKSV-DYWQ-QD-----KW-SGQFPVKWHIIKDVPNSQ-FRHIVLENNDNK-PVTNSRDTQEVK-----<br>LEQGVEMLNIF       |
|                            | Potri.001G357800.1 | PtYTH DC1Aa | KL-----YFIVKSCNLEN--LEL--SVQQGVWATQRSNEPKLNEA---FD-----SAEN-----<br>-----VILIFS-----VNRTRHFQ-----GCAKM---TSKIGASVGG-<br>GNWK-YA-----HGTAH-----Y-GRNFSVKWLKCELSFHK-TRHLRNPFNENL-PVKISRDCQELE-----PSIGEQLASLL            |
|                            | Potri.003G008400.1 | PtYTH DF6C  | AF-----FFVIKSYSEDD--IHK--SIKYNVWASTPNGNKRLSA---YL-----DSQQK-IAQ-----<br>-----IGCSCP----VFLFFS-----VNASGQFC-----GVAEM---<br>TGRVDFNKNM-DFWQ-QE-----KW-NGYFPVKWHIIKDIPNPQ-LRHIILENNENK-PVTNSRDTQEVK-----FPQGIEILNIF      |
|                            | Potri.003G222700.1 | PtYTH DF1A  | AK-----FFVIKSYSEDD--VHK--SIKYNVWSSTPHGNKKLQTA---FE-----DAQKL-AVG-----<br>-----RPRGCP----IFLFFS-----VNASGQFC-----GVAEM---<br>IGPVDLHRDM-DFWQ-QD-----KW-SGSFLVKWHIIKDIPNSS-FRHIILENNENK-PVTNSRDTQEIM-----YKQGLEMLKTF     |
|                            | Potri.004G223800.1 | PtYTH DF5C  | AK-----FFVIKSYSEDD--VHK--SIKYNVWSSTPHGNKKLHSA---FE-----YAQKL-DLG-----<br>-----RPRGCP----IFLFFS-----VNASGQFC-----GVAEM---<br>VGPVDFNRDM-DFWQ-QD-----KW-SGSFLVKWHIIKDIPNSS-FRHIILENNENK-PVTNSRDTQEIM-----<br>YKQGLEMLKMF |
|                            | Potri.006G079900.1 | PtYTH DF3B  | AF-----FFVIKSYSEDD--IHK--SIKYNVWASTPNGNKRLLDSA---YQ-----DAQQK-IAE-----<br>-----KGNSCP----VFLFFS-----VNASGQFC-----GVAEM---<br>VGRVDFNKNM-DFWQ-QD-----KW-NGYFPVKWHIIKDVPNPQ-LRHIILENNENK-PVINSRDTQEVK-----FPQGIEILNIF    |
|                            | Potri.007G002800.1 | PtYTH DF2B  | AK-----FFIIKSYSEDN--VHK--SIKYGVWASTPNGNRKLDTT---YR-----EAKEK-----<br>-----QDPCP----VLLFS-----VNASAQFC-----GVAEM---<br>TGPVDFDKSV-DYWQ-QD-----KW-SGQFPVKWHIIKDVPNSQ-FRHIVLENNDNK-PVTNSRDTQEVK-----<br>LEQGIEMLNIF       |
|                            | Potri.008G080800.1 | PtYTH DF4C  | AK-----FFIIKSFSEDN--VHK--SIKYSVWASTPHGNKKIDAA---YR-----EAKEK-----<br>-----EGNCP----VLLFS-----VNASGQFC-----GVAEM---<br>VGPVDFEKDA-EYWQ-QD-----RW-NGQFPVQWHIVKDVPNSR-FRHILLENNDNK-PATHSRDSQEVK-----<br>LEQGIEMLKIF       |
|                            | Potri.008G100200.1 | PtYTH DF2C  | AK-----FFVIKSYNEDD--IHK--SIKYDVWASTPNGNKKLDAA---FH-----NAEEV-SSE-----<br>-----TGTKCP----IFLFFS-----VNGSGQFV-----GLAEM---<br>VGQVDFNKDM-DFWQ-ID-----KW-NGFFPVKWHVIKDIPNGQ-LRHIVLENNDGH-SVTFSRDTQEIG-----<br>LEKGLEMLNIF |



|                                          |                    |                         |                                                                                                                                                                                                                        |
|------------------------------------------|--------------------|-------------------------|------------------------------------------------------------------------------------------------------------------------------------------------------------------------------------------------------------------------|
|                                          | Potri.010G152300.1 | PtYTH<br>DF1C           | AK-----FFIIKSYSEDD--VHK--CIKYNVWASTPNGNKKLDAA---YQ-----EAEQK-S-----<br>-----GGCP----VFLIFS-----VNTSGQFV-----GLAEM---<br>TGRVDFDKSV-EYWQ-QD-----KW-TGYFPVKWHIVKDVPSNF-LKHITLENNENK-PVTNSRDTQEVK-----<br>LEQGLKLIKIF     |
|                                          | Potri.010G175500.1 | PtYTH<br>DF3C           | AK-----FFVIKSYSEDD--IHK--SIKYDVWASTPNGNKKLDAA---FH-----NAEEV-SSD-----<br>-----TGYKCP----IFLIFS-----VNGSGQFV-----GFAEM---<br>VGQVDFNKDM-DFWQ-ID-----KW-NGFFPVKWHVVKDIPNGH-LRHIVLENNDGH-SVTFSRDTQEIV-----<br>LKQGLEMLNIF |
|                                          | Potri.011G089800.1 | PtYTH<br>DC1Ab          | SQF-----VYFIVKSCNREN--LEL--SVQQGVWATQRSNEIKLNEA---LD-----SADN-----<br>-----VILIFS-----VNRTRHFQ-----GCAKM--ASKIGASVGG-<br>GNWK-YA-----HGTAH-----Y-GRNFSVKWLKLCELSFHK-TRHLRNPFNENL-PVKISRDCQELE-----PSIGEQLASLL          |
|                                          | Potri.014G001000.1 | PtYTH<br>DF1B           | TR-----YFIIKSLNQHN--IQL--SIENGIWATQVRNEPILEEA---FH-----NSGR-----<br>-----VILIYS-----VNMSGFFQ-----GYAQM--ISSVGWRHD--NLWS-<br>EG-----SGKSN-----PW-GRSFKVKWLRLNDLPFQK-TLHLKNPLNDYK-PVKISRDCQELP-----EDIGEALCELI           |
|                                          | Potri.018G149800.1 | PtYTH<br>DF4B           | AK-----FFVIKSYSEDN--VHK--SIKYGVWASTPNGNKKLDAA---YR-----EAKEN-----<br>-----HGTCP----IFLLFS-----VNASAQFC-----GVAEM---<br>VGPVDFDKNV-DFWQ-QD-----KW-SGQFPVKWHIIKDVPNSQ-FRHIVLENNDNK-PVTNSRDTQEVE-----<br>LEQGAEMLGIF      |
|                                          | Potri.019G034300.1 | PtYTH<br>DF3A           | AK-----FFIIKSYSEDD--VHK--CIKYNVWASTPNGNKKLDAA---YQ-----EAGQK-S-----<br>-----GGCP----VFLIFS-----VNTSGQFV-----GLAEM---<br>TGRVDFDKSV-EYWQ-QD-----KW-TGYFPVKWHFVKDVPNSL-LKHITLENNENK-PVTNSRDTQEVK-----<br>LEQGLEMIF       |
| <i>Physcomitr<br/>ella patens</i>        | Pp3c10_17810V3.1   | PpaYT<br>HDF2           | TR-----YFIIKSLNHHN--IEK--SIEKGIWATQAMNETVLNEA---FE-----TSEK-----<br>-----VVLVFS-----VNMSSHQ-----GYALM--SSPIGQRRRA--NIWS-<br>EA-----NEGAN-----PW-GGTFHVEWLRLYDLPFQK-TVHLKNPLNAFK-PVKISRDCQELT-----QAIGKALCALI           |
|                                          | Pp3c20_9290V3.1    | PpaYT<br>HDC1A          | AK-----FFVIKSYSEDD--VHK--SIKYNVWASTPVGNKRLDAA---YQ-----EALTK-CNG-----<br>-----DTKSYP----VFLIFS-----VNASGQFC-----GMAQM---<br>TGRVDFSFSV-DYWQ-QD-----KW-NGRFPVTWHIIKDIPNCQ-FRHIILENNDNK-PVTNSRDTQEVK-----<br>FEQGMAMLNIF |
|                                          | Pp3c3_33560V3.1    | PpaYT<br>HDF1           | CR-----YFIVKSSNREN--LEL--SVERGLWATHRNNEAKLNDA---FD-----SCEH-----<br>-----VIFIFS-----VNETRHFQ-----GCARM--MSKIGGVAGG-<br>GAWK-YA-----HGTAN-----Y-GRNFRLKWLKLCELSFYK-TRHLRNSYNENM-PVKISRDCQELE-----PSVGEQLALLL            |
|                                          | Pp3c8_11880V3.1    | PpaYT<br>HDC1B          | AK-----FFVIKSYSEDD--VHK--SIKYNVWASTPVGNKRLDAA---YL-----EALAK-SNG-----<br>-----DTKSFP----VFLIFS-----VNASGQFC-----GVAQM---<br>TGPVDFSFSV-DFWQ-QD-----KW-NGRFPVVWHIIKDIPNCQ-FRHIILENNDNK-PVTNSRDTQEVK-----FEQGFGMLNIF     |
| <i>Saccharom<br/>yces<br/>cerevisiae</i> | Sacce1/1410        | PHO92<br>(ScYTH<br>DF1) | SR-----FFVIKSSSLKH--VKR--SFYNGIWSSTHFGNKRLSEA---YK-----KLNSG-----<br>-----AK----VFLIFS-----INTSGRFC-----GVAEM---VSDLKMDLDT-<br>SIWEDEQ-----KY-GKAFKVRWVIVRDINNRS-LKRFLIPSNEMK-PITHSRDTQEIP-----YSIGISIINLF             |

|                                           |                  |                        |                                                                                                                                                                                                                         |
|-------------------------------------------|------------------|------------------------|-------------------------------------------------------------------------------------------------------------------------------------------------------------------------------------------------------------------------|
| <i>Schizosacc<br/>haromyces<br/>pombe</i> | Schpo1/4324      | MMI1<br>(SpYTH<br>DC1) | SR-----YFIMLCDNETA--IAH--AKKTSIWAVKKDSSKRISDA---YK-----KAS-----<br>-----VYFIFV-----AQQTYNAL-----GYAQV---VSDLNSTELP--<br>FWSDSS-----H-----AGGVRIKWIKTCNLFSAE-ISEIVSHMDHGS---EARDGMEMM-----YDEGSRLCTLI                    |
| <i>Setaria<br/>italica</i>                | Seita.2G046200.1 | SiYTH<br>DF3A          | AK-----FFIIKSYSEDD--VHK--SIKYNVWASTPNGNKKLDAA---YQ-----EAKEK-S-----<br>-----SESP----VLLFS-----VNASGQFV-----GLAEM---<br>VGRVDFNKTV-EHWQ-QD-----KW-TGCFPVKWHIVKDVPNSL-LKHIILENNENK-PVTNSRDTHEVK-----<br>LEPGLQVLKIF       |
|                                           | Seita.2G149700   | SiYTH<br>DF5C          | AK-----FFVIKSYNEAD--IHK--SIKYGWSTSSVGNLKLDTA---FR-----DAQVI-AAS-----<br>-----SSTLCP----VLLFFS-----VNGSSHFC-----GVAEM---<br>VGPDYQNDM-DFWCRKN-----KW-IGSFPVKWHIIKNVHNST-FRSISLQNNEDK-PVTSSRDTQEIH-----<br>YTPGTTMLELF    |
|                                           | Seita.3G070000.1 | SiYTH<br>DF3C          | AK-----FFMIKSYSEDD--IHK--GIKYNVWASTPNGNKKLDAA---YH-----DAQIL-MKE-----<br>-----NGEKCP----VLLFFS-----VNTSGQFV-----GLAEM---<br>LGPVDFKKTm-DFWK-DD-----RW-SGFFPIIWHIIKDIPNRL-FRHIILEYNDNR-PVTFSRDTQEIG-----LLQGVQMLKIF      |
|                                           | Seita.4G262400.1 | SiYTH<br>DC1A          | SR-----YFIVKSCNREN--LEI--SVQQGIWATQRSNEAKLNEA---FE-----STEN-----<br>-----VILIFS-----INRTRHFQ-----GCAKM--TSRIGGYIGG-GNWK-<br>SA-----HGTAH-----Y-GRNFMSQWLKLCELSFQK-THHLRNPYNDNL-PVKISRDCQELE-----PFIGEQLASLL             |
|                                           | Seita.5G156800.1 | SiYTH<br>DF2C          | AK-----FFVIKSIGEAD--VHK--SIKYGWSSSSNGNSKLDSA---FR-----DADRI-SRR-----<br>-----NSTKCP----VLLFFS-----VNGSGHFC-----GMAEM---<br>VGPDVDFHKDM-DFWC-QD-----KW-TGCFPVRWHIVKDIPNYS-LQHITLQNNENK-PVTHSRDTQEIP-----YIPGMSVLKIF      |
|                                           | Seita.5G271100.1 | SiYTH<br>DF1C          | AL-----FFVIKSYSEDD--IHK--SIKYSVWASTPNGNKRLDNA---YR-----LAQER-MAE-----<br>-----KGTKCP----VLLFFS-----VNASGQFC-----GVAEM---<br>VGPDVDFNRNM-NFWQ-QD-----KW-NGFFSVKWHIIKDVPNPQ-FRHIILENNENK-PVTNSRDTQEVK-----<br>FPQGTEMLNIF |
|                                           | Seita.6G022500.1 | SiYTH<br>DF1B          | AK-----FFVIKSYTEDH--VHR--SIKYSVWASTASGNRKLDSA---YR-----AAKEK-----<br>-----EDHCP----IFLFFS-----VNGSGQFC-----GVAEM---IGPVDFDRSV-<br>DYWQ-QD-----KW-SGQFPVKWHIIKDVPNNL-LRHIILENNDNK-PVTNSRDTQEVK-----LEQGLQMLTIF           |
|                                           | Seita.6G246600.1 | SiYTH<br>DF2B          | AR-----FFIIKSYSEDN--VHK--SVKYGVWASTTNGNKKLDASA---YR-----EAKEK-----<br>-----EEQCP----IFLLFS-----VNASAQFC-----GVAEM---IGPVDFEKSv-<br>DYWQ-QD-----KW-TGQFPVKWHIVKDVPNNL-FRHIILENNDNK-PVTNSRDTQEVK-----LEQGLEMLKIF          |
|                                           | Seita.7G231300.1 | SiYTH<br>DF3B          | AK-----FFVIKSYTEDH--IHK--SIKYNVWASTASGNRKLNAa---YR-----EAKER-----<br>-----EDYCP----IFLFFS-----VNGSGQFC-----GVAEM---IGPVDFDKSV-<br>DYWQ-ND-----RW-SGQFPVKWHTVKDVPNNL-VRHIILENNENK-RVTNSRDTQEVK-----LEQGVQMLAIF           |
|                                           | Seita.7G270400.1 | SiYTH<br>DF4C          | AK-----FFVIKSYNEAD--IHK--SIKYGWSTSSVGNLKLDTA---FR-----DAQVI-AAS-----<br>-----SSTLCP----VLLFFS-----VNGSSHFC-----GVAEM---<br>VGPDYQNDM-DFWCRKN-----KW-IGSFPVKWHIIKNVHNST-FRSILLQNNEDK-PVTSSRDTQEIH-----<br>YTPGTTMLELF    |

|                                      |                    |                |                                                                                                                                                                                                                        |
|--------------------------------------|--------------------|----------------|------------------------------------------------------------------------------------------------------------------------------------------------------------------------------------------------------------------------|
|                                      | Seita.9G059600.1   | SiYTH<br>DF4A  | AK-----FFIIKSYSEDD--VHK--SIKYNVWASTPSGNKKLDAA---YV-----EAKEK-S-----<br>-----SSSP----VFLIFS-----VNTSGQFV-----GLAEM---VGRVDFNKTV-<br>EYWQ-QD-----KW-TGCFPVKWHIVKDIPNGL-LKHIILEYNENK-PVTNSRDTQEVK-----LDQGLQVLKIF         |
|                                      | Seita.9G092900.1   | SiYTH<br>DF2A  | AK-----FFVIKSYSEDD--VHK--SIKYNVWASTPNGNKKLDAG---YR-----EAQEK-S-----<br>-----SDCP----VFLFFS-----VNTSGQFV-----GVAEM---<br>VGPVDFDKTV-EYWQ-QD-----KW-NGCFPLKWHIVKDVNNI-LKHITLDNNDNK-PVTNSRDTQEVK-----<br>LEQGLEMLKIF      |
|                                      | Seita.9G534000.1   | SiYTH<br>DF1A  | AK-----FFVIKSYSEDD--IHK--SIKYNVWASTTNGNKKLDAA---YQ-----EAQSK-G-----<br>-----SACP----IFLFFS-----VNTSGQFV-----GVAEM---TGAVDFECTL-<br>EYWQ-QD-----KW-NGSFSCLKWHIVKDVNNM-LKHIILENNENK-PVTNSRDTQEIH-----LEQGLQMLKIF         |
| <i>Solanum<br/>lycopersic<br/>um</i> | Solyc01g028860.2.1 | SIYTH<br>DF1A  | AK-----FFIIKSYSEDD--VHK--SIKYNVWASTPNGNKKLDAA---YQ-----EAQQN-S-----<br>-----GGCP----VFLFFS-----VNTSGQFV-----GVAEM---<br>VGPVDFNKNV-EYWQ-QD-----KW-VGCFPVKWHIVKDVNSL-LKHITLENNENK-PVTNSRDTQEVK-----<br>VEQGLQVLKIF      |
|                                      | Solyc01g103540.2.1 | SIYTH<br>DF2C  | AK-----FYIIKSYSEDD--IHK--CVKYDVWSSTPNGNKKLDTA---FV-----ESEAK-ASG-----<br>-----TGSSCP----VFLFFS-----VNGSGQFL-----GVAEM---<br>VGQVDFNRNM-DFWQ-LD-----KW-SGFFPLKWHIVKDVPNTQ-FRHIILENNDNR-PVTYSRDTQEIG-----<br>LKEGLEMLNIL |
|                                      | Solyc02g021760.2.1 | SIYTH<br>DC1A  | SR-----YFIVKSCNREN--LEL--SVQQGVWATQRSNEAKLNEA---FD-----SVEN-----<br>-----VILIFS-----VNRTRHFQ-----GCGKM---TSRIGGAANG-<br>GNWK-HE-----HGTAH-----Y-GRNFSCLKWLKCELSFQK-THHLRNPYNENL-PVKISRDCQELE-----PSVGEQLASLL           |
|                                      | Solyc02g070240.2.1 | SIYTH<br>DC1Ab | SR-----YFIVKSCNREN--LEL--SVQQGVWATQRSNEAKLNEA---FD-----SVEN-----<br>-----VILIFS-----INRTRHFQ-----GLAKM---TSRIGGAAKG-<br>GNWK-HE-----HGTAH-----Y-GRNFSVKWLKCELSFQK-TRHLRNPYNENL-PVKISRDCQELE-----ISVGEQLASLL            |
|                                      | Solyc05g032850.2.1 | SIYTH<br>DF1B  | AK-----FFVIKSFSEDN--VHK--SIKYGVWASTPQGNRKLDAA---YA-----EAKEM-----<br>-----NANCP----VFLFFS-----VNASGQFC-----GVAEM---<br>VGPIDFENSA-EYWQ-QD-----RW-SGKFPPVKWHVIKDV PNSQ-FRHILLEHNDNK-PVTHSRDSQEVK-----<br>LPEGLEMLKIF    |
|                                      | Solyc08g007730.2.1 | SIYTH<br>DC1B  | IR-----YFVIKSLNHEN--IQL--SVNRGIWATQAMNEAILDEA---FH-----NSSK-----<br>-----VILIFS-----VNTSGYFQ-----GYAQM---ISSV-GLRRD-QVWS-<br>QG-----NGGRN-----SW-GRSFEVNWRLRYDLPFQR-TLHLKNPWNQNK-PVKISRDCQELP-----PDIGEALCELL          |
|                                      | Solyc12g099090.1.1 | SIYTH<br>DF1C  | AK-----FFVIKSYSEDD--VHK--SIKYNVWSSTPNGNKKLNSA---YE-----DAQRI-TPG-----<br>-----NPRGCP----IFLFFS-----VNASGQFC-----GVAEM---<br>TGPVDFYKDM-DFWQ-QD-----KW-SGSFPVKWHFIKDVNPN-FRHIILENNENK-PVTNSRDTQEIR-----<br>YKKGIEMLKVF  |
| <i>Sphagnum<br/>fallax</i>           | Sphfalx0029s0025.1 | SfYTH<br>DF1   | AK-----FFVIKSYSEDD--VHK--SIKYNVWASTPVGNKRLDAA---FK-----DASGK-----<br>-----AVGGCP----VFLFFS-----VNASGQFC-----GVAEM---<br>TGPVDFTQSV-EYWQ-QD-----KW-NGRFTVKWHIIKDIPNCQ-FRHIILENNDNK-PVTNSRDTQEV R-----FEQGIEMLSIF        |

|                       |                    |                |                                                                                                                                                                                                                         |
|-----------------------|--------------------|----------------|-------------------------------------------------------------------------------------------------------------------------------------------------------------------------------------------------------------------------|
|                       | Sphfalx0037s0069.1 | SfYTH<br>DF2   | AK-----FFVIKSYSEDD--VHK--SIKYNVWASTPAGNKRLDAA---FL-----ESQSK-AGG-----<br>-----KQGSCP----VFLFFS-----VNASGQFC-----GVAEM---<br>VGPVDFGKSV-EYWQ-QD-----KW-NGRFTVKWHIIKDIPNCQ-FRHIILENNDNK-PVTNSRDTQEVK-----FEQAISMLNIF      |
|                       | Sphfalx0040s0172.1 | SfYTH<br>DF3   | AK-----FFVIKSYSEDD--VHK--SIKYNVWASTPAGNKRLDAA---FL-----EAQNKVASG-----<br>-----KPGSCP----VFLFFS-----VNASGQFC-----GVAEM---<br>VGPVDFGKSV-EYWQ-QD-----KW-NGCFAVKWHIIKDIPNCH-FRHIILENNDNK-PVTNSRDTQEVK-----FEQAIGMLNIF      |
|                       | Sphfalx0156s0007.1 | SfYTH<br>DC1B  | TK-----YFIIKSLNHHN--LAK--SIEKGIWATQAMNEPVLNEA---FE-----TCER-----<br>-----VVLVFS-----VNMSSHQ-----GYARM--ASPIGRRRA--<br>NIWS-EA-----NEGAN-----PW-GGTRFEWLCLYDLPFQK-TVHLKNPLNSFK-PVKISRDCQELT-----KEIGEALCALI              |
|                       | Sphfalx0235s0015.1 | SfYTH<br>DC1A  | CR-----YFIVKSNNREN--LEL--SVERGLWATHRNEAKLNEA---FD-----TCDH-----<br>-----VILVFS-----VNETRHFQ-----GCARM--MSKIGGVIGG-<br>GGWK-YA-----HGTAH-----Y-GRNFNLRWLKLCELSFNK-TRHLRNAYNENL-PVKISRDCQELE-----PSVGEQLASLL              |
| <i>Zostera marina</i> | Zosma103g00140.1   | ZmaYT<br>HDF3C | AR-----FFVIKSYSEDN--VHK--SIKYGLWASTPNGNRKLDAA---YR-----EAKEK-----<br>-----GGACP----VFLFFS-----VNSSAQFC-----GVAEM---<br>IGHVDFNKSVDYWQ-QD-----KW-SGNFPLKWHIVKDVPSM-FRHIILENNDKK-PVTNSRDTQEIK-----<br>LKQGLEMLSIF         |
|                       | Zosma105g00190.1   | ZmaYT<br>HDF2C | AR-----FFVIKSYSEDD--VHK--SIKYNMWSSTPSGNKRLDVA---YD-----GAKKI-SES-----<br>-----KKMLCP----VFLFFS-----VNASGQFC-----GVSEM---<br>KGPVDFHKDM-DFWQ-QD-----KW-SGSFPVKWHIVKDVANSN-FRHIILENNENK-SVTNSRDTQ EVP-----<br>YKAGVSMLNIF |
|                       | Zosma105g00770.1   | ZmaYT<br>HDF5C | AK-----FYIIKSYSEDD--IHK--SIKYNVWASTPNGNKKLDAG---YQ-----EAQEK-S-----<br>-----GGLP----LFLFFS-----VNTSGQFV-----GVAEM---<br>VGNVDFNKTV-DYWQ-QD-----KW-NGCFPVKWHIVKDVPSNI-LKHITLENNDNK-PVTNSRDTQEVK-----<br>FEQGIQLLKLF      |
|                       | Zosma14g00600.1    | ZmaYT<br>HDF4C | SR-----YFIVKSCNREN--LEL--SVQQGAWATQRSNEAKLNGA---FE-----TTDN-----<br>-----VILLFS-----INRTRHFQ-----GCAKM--TSKIGGYVGG-<br>GNWK-YA-----HGTPH-----Y-GRNFSIKWLKLGELSFHK-TRHLRNPYNDNL-PVKISRDCQELD-----PFVGPQLATLL             |
|                       | Zosma158g00160.1   | ZmaYT<br>HDC1A | AL-----FFIIKSYSEDD--IHK--SIKYNVWTSTSNGNKKLDNA---FH-----KIQEN-IGERG-----<br>-----LSSSKCP----VFLFFS-----VNASGQFC-----GVAEM---<br>IGGVDFNKHWNFWQ-QD-----KW-NGSFPVKWHIIKDVPNSH-FRHIILANNSDK-PVTNSRDTQEIM-----FQQGSDMLSIF    |
|                       | Zosma39g00650.1    | ZmaYT<br>HDF1A | AK-----FFMIKSYNEDD--VHK--SIKYNVWASTSSGNKKLND A---FR-----VVENI-FKE-----<br>-----SSIKCP----IFLFFS-----VNTSGKFL-----GIAEM---<br>VGQVDFKKSM-DFWQ-EE-----RW-SGFFPLQWHIVKDV PNIN-FKNITLPNNDNR-LVYYSRDTQEIP-----LLQGLEMLKIF    |
|                       | Zosma467g00180.1   | ZmaYT<br>HDF1C | AL-----FFIIKSYSEDD--IHK--SIKYNVWASTPNGNKRLDAA---FQ-----SAQNQ-MKE-----<br>-----KGCACP----VFLFFS-----VNASGQFC-----GVAEM---<br>TGRVDFNKNM-DFWQ-QD-----KW-NGYIPVKWHIIKDVPNPH-FRHIILENNDNK-PVTNSRDTQEV L-----<br>FLRGSDMLKIF |

|                                 |                              |                |                                                                                                                                                                                                                        |
|---------------------------------|------------------------------|----------------|------------------------------------------------------------------------------------------------------------------------------------------------------------------------------------------------------------------------|
|                                 | Zosma91g00280.1              | ZmaYT<br>HDF1B | AS-----FFVIKSYSEDD--IHK--SIKYNVWASTLNGNKILDSA---FQ-----TAEKMMKEE-----<br>-----GNNHHP----IFLFFS-----VNASGQFC-----GVAEM---<br>IGRVDFNKNM-GFWQ-QD-----KW-NGFFPVKWHIIKDVPNPQ-LRHIKLENNDYK-PVTNSRDTQEVK-----<br>LTQGSEMLNIF |
| <i>Bos taurus</i>               | tr E1BAQ2 E1BAQ2             | BtYTH<br>DF1   | GR-----VFIKSYSEDD--VHR--SIKYSLWCSTEHGNNRRLDSA---FR-----ALGSK-----<br>-----GP----VYLLFS-----VNGSGHFC-----GVAEM---KSPVDYGTSA-<br>GVWS-QD-----KW-KGKFDVKWIFVKDVPNSQ-LRHIRLENNDNK-PVTNSRDTQ EVP-----LEKARQVLRII            |
|                                 | tr E1BH80 E1BH80             | BtYTH<br>DF3   | GR-----VFIKSYSEDD--IHR--SIKYSIWCSTEHGNNKRLDAA---YR-----SLNGK-----<br>-----GP----LYLLFS-----VNGSGHFC-----GVAEM---KSVVDYNAYA-<br>GVWS-QD-----KW-KGKFEVKWIFVKDVPNNQ-LRHIRLENNDNK-PVTNSRDTQ EVP-----LEKAKQVLKII            |
|                                 | sp Q0VCZ3 YTHD2              | BtYTH<br>DF2   | GR-----VFIKSYSEDD--IHR--SIKYNIWCSTEHGNNKRLDAA---YR-----SMNGK-----<br>-----GP----VYLLFS-----VNGSGHFC-----GVAEM---KSAVDYNTCA-<br>GVWS-QD-----KW-KGRFDVRWIFVKDVPNSQ-LRHIRLENNENK-PVTNSRDTQ EVP-----LEKAKQVLKII            |
|                                 | XP_005208101                 | BtYTH<br>DC1   | AR-----FFLIKSNNHEN--VSL--AKAKGVWSTLPVNEKKLNVA---FR-----SARS-----<br>-----VILIFS-----VRESGKFQ-----GFARL---SSESHHGGSP-<br>IHWV-LP-----AGMSAK-----ML-GGVFKIDWICRREL PFTK-SAHLTNPWNEHK-PVKIGRDGQEIE-----LECGTQLCLLF        |
|                                 | NP_001179740                 | BtYTH<br>DC2   | IR-----YFIMKSSNLRN--LEI--SQQKGIWSTTPSNERKLNRA---FW-----ESSM-----<br>-----VYLVFS-----VQGSGHFQ-----GFSRM---SSEIGREKSQ-----<br>-----DWGSA-----GL-GGVFKVEWIRKESLPFQF-AHLLNPWNDNK-KVQISR DGQEIE-----PQVGEQLLQLW             |
| <i>Dipodomys ordii</i>          | tr A0A1S3GAX5 A0A1<br>S3GAX5 | DoYTH<br>DF1   | GR-----VFIKSYSEDD--IHR--SIKYSIWCSTEHGNNKRLDSA---FR-----AVASK-----<br>-----GP----VYLLFS-----VNGSGHFC-----GVAEM---KSAVDYGTSA-<br>GVWS-QD-----KW-KGKFDVKWIFVKDVPNSQ-LRHIRLENNDHK-PVTNSRDTQ EVP-----LEKAKQVLKII            |
|                                 | tr A0A1S3EK84 A0A1S<br>3EK84 | DoYTH<br>DF3   | GR-----VFIKSYSEDD--IHR--SIKYSIWCSTEHGNNKRLDAA---YR-----SLNGK-----<br>-----GP----LYLLFS-----VNGSGHFC-----GVAEM---KSVVDYNAYA-<br>GVWS-QD-----KW-KGKFEVKWIFVKDVPNNQ-LRHIRLENNDNK-PVTNSRDTQ EVP-----LEKAKQVLKII            |
|                                 | tr A0A1S3GQM8 A0A1<br>S3GQM8 | DoYTH<br>DF2   | GR-----VFIKSYSEDD--IHR--SIKYNIWCSTEHGNNKRLDAA---YR-----SMNGK-----<br>-----GP----VYLLFS-----VNGSGHFC-----GVAEM---KSAVDYNTCA-<br>GVWS-QD-----KW-KGRFDVRWIFVKDVPNSQ-LRHIRLENNENK-PVTNSRDTQ EVP-----LEKAKQVLKII            |
|                                 | XP_012864393                 | DoYTH<br>DC1   | AR-----FFLIKSNNHEN--VSL--AKAKGVWSTLPVNEKKLNLA---FR-----SARS-----<br>-----VILIFS-----VRESGKFQ-----GFARL---SSESHHGGSP-IHWV-<br>LP-----AGMSAK-----ML-GGVFKIDWICRREL PFTK-SAHLTNPWNEHK-PVKIGRDGQEIE-----LECGTQLCLLF        |
|                                 | XP_012871461                 | DoYTH<br>DC2   | VR-----YFIMKSSNLRN--LEI--SQQKGIWSTTPSNERKLNRA---FW-----ESSM-----<br>-----VYLVFS-----VQGSGHFQ-----GFSRM---SSEIGREKSQ-----<br>-----DWGSA-----GL-GGVFKVEWIRKESLPFQC-AHLLNPWNDNK-KVQISR DGQEIE-----PQVGEQLLQLW             |
| <i>Callorhinc<br/>hus milii</i> | XP_007909300                 | CmYTH<br>DF1   | GR-----VFIKSYSEDD--IHR--SIKYSIWCSTEHGNNKRLDSA---YR-----SMAGK-----<br>-----GP----VYLLFS-----VNGSGHFC-----GVAEM---KSAVDYGTCA-<br>GVWS-QD-----KW-KGKFDVKWIFVKDVPNNQ-LRHIRLENNDNK-PVTNSRDTQ EVP-----LEKAKQVLKII            |

|                                          |                  |              |                                                                                                                                                                                                                 |
|------------------------------------------|------------------|--------------|-----------------------------------------------------------------------------------------------------------------------------------------------------------------------------------------------------------------|
|                                          | XP_007894925     | CmYTH<br>DF3 | GR-----VFIKSYSEDD--IHR--SIKYSIWCSTEHG NKRLDAA---FR-----SLNGK-----<br>-----GP----LYLLFS-----VNGSGHFC-----GVAEM---KSAVDYNAYA-<br>GVWS-QD-----KW-KGKFEVKWIFVKDVPNNQ-LRHIRLENNDNK-PVTNSRDTQ EVP-----LEKAKQVLKII     |
|                                          | XP_007893091     | CmYTH<br>DF2 | GR-----VFIKSYSEDD--IHR--SIKYSIWCSTEHG NKRLDSA---YR-----TMNGK-----<br>-----GP----VYLLFS-----VNGSGHFC-----GVAEM---KSTVDYSTCA-<br>GVWS-QD-----KW-KGRFDVRWIFVKDVPNSQ-LRHIRLENNENK-PVTNSRDTQ EVP-----LEKAKQVLKII     |
|                                          | XP_007902407     | CmYTH<br>DC1 | AR-----FFLIKSNNHEN--VSL--AKAKGVWSTLPVNEKKLNTA---FR-----DARS-----<br>-----VILIFS-----VRESGKFQ-----GFARL---SSESHHGGSP-<br>IHWV-LP-----AGMNAK-----ML-GGVFKIDWICRREL PFTK-TSHLVNLWNENK-PVKIGRDGQEIE-----PDCGTQLCLLF |
|                                          | XP_007895610     | CmYTH<br>DC2 | VR-----FFILKSSNLRN--LEI--SQQKGIWSTTPSNERKLNRA---FW-----ESSI-----<br>-----VYLVFS-----VQGSGHFQ-----GFARM---ISEIGRERSQ-----<br>-----EWGSA-----GL-GGVFRVEWIRKESLPFQY-AHLLNPWNDNK-KVQISR DGQELE-----PQVGEQLVQLW      |
| <i>Xenopus<br/>tropicalis</i>            | tr Q6P1V5 Q6P1V5 | XtYTH<br>DF1 | GR-----VFIKSYSEDD--IHR--SIKYSIWCSTEHG NKRLDSA---FR-----SMNGK-----<br>-----GP----VYLLFS-----VNGSGHFC-----GVAEM---KSPVDYGTSA-<br>GVWS-QD-----KW-KGKFDVKWLFVKDVPNNQ-LRHIRLENNDNK-PVTNSRDTQ EVP-----LEKAKLVLKII     |
|                                          | tr B1H2Z7 B1H2Z7 | XtYTH<br>DF3 | GR-----VFIKSYSEDD--IHR--SIKYTIWCSTEHG NKRLDAA---YR-----SLNGK-----<br>-----GP----LYLLFS-----VNGSGHFC-----GVAEM---KSVVDYNAYA-<br>GVWS-QD-----KW-KGKFDVKWVFVKDVPNNQ-LRHIRLENNDNK-PVTNSRDTQ EVP-----LEKAKQVLKII     |
|                                          | XP_002934690     | XtYTH<br>DF2 | GR-----VFIVKSYSEDD--IHR--SIKYNVWCSTEHG NKRLDAA---YR-----SLNGK-----<br>-----GP----LYLLFS-----VNGSGHFC-----GVAEM---RSAVDYNTCA-<br>GVWS-QD-----KW-KGRFDVRWLFVKDVPNGQ-LRHIRLENNDNK-PVTNSRDTQ EVP-----LEKARQVLR II   |
|                                          | NP_001008121     | XtYTH<br>DC1 | AR-----FFLIKSNNHEN--VSL--AKAKGVWSTLPVNEKKLNAA---FR-----SARS-----<br>-----VILVFS-----VRESGKFQ-----GFARL---SSESHHGGSP-<br>IHWV-LP-----AGMNAK-----ML-GGVFKIDWICRREL PFTK-CVHLTNPWNEHK-PVKIGRDGQEIE-----PDCGTQLCLLF |
|                                          | XP_004910524     | XtYTH<br>DC2 | VR-----YFIMKSSNLRN--LEI--SQQKGIWSTTPSNERKLNQA---FW-----ESST-----<br>-----VYLVFS-----VQGSGHFQ-----GFARM---TSEIGREKSQ-----<br>-----DWGST-----SL-GGVFKVEWIRKESLPFQQ-AHLLNPWNDNK-KVQISR DGQELE-----TLVGEQLLLLW      |
| <i>Ornithorhyn<br/>chus<br/>anatinus</i> | tr F7DG05 F7DG05 | OaYTH<br>DF1 | GR-----VFIKSYSEDD--IHR--SIKYSIWCSTEHG NKRLDSA---FR-----SMNSK-----<br>-----GP----VYLLFS-----VNGSGHFC-----GVAEM---KSPVDYGTSA-<br>GVWS-QD-----KW-KGKFDVKWIFVKDVPNNQ-LRHIRLENNDNK-PVTNSRDTQ EVP-----LEKAKQVLKII     |
|                                          | tr F6Q844 F6Q844 | OaYTH<br>DF3 | GR-----VFIKSYSEDD--IHR--SIKYSIWCSTEHG NKRLDAA---YR-----SLNGK-----<br>-----GP----LYLLFS-----VNGSGHFC-----GVAEM---KSVVDYNAYA-<br>GVWS-QD-----KW-KGKFDVKWVFVKDVPNNQ-LRHIRLENNDNK-PVTNSRDTQ EVP-----LEKAKQVLKII     |
|                                          | XP_007662869     | OaYTH<br>DF2 | GR-----VFIKSYSEDD--IHR--SIKYNIWCSTEHG NKRLDAA---FR-----SLNAK-----<br>-----GP----VYLLFS-----VNGSGHFC-----GVAEM---CSAVDYNTCA-<br>GVWS-QD-----KW-KGRFDVRWIFVKDVPNSQ-LRHIRLENNENK-PVTNSRDTQ EAP-----LEKAKQVLKII     |

|                                |                          |              |                                                                                                                                                                                                             |
|--------------------------------|--------------------------|--------------|-------------------------------------------------------------------------------------------------------------------------------------------------------------------------------------------------------------|
|                                | XP_028929054             | OaYTH<br>DC1 | AR-----FFLIKSNNHEN--VSL--AKAKGVWSTLPVNEKKLNAA--FR-----SARS-----<br>-----VILIFS-----VRESGKFQ-----GFARL--SSESHHGGSP-<br>IHWV-LP-----AGMNAK-----ML-GGVFKIDWICRRELPTK-SAHLTNPWNEHK-PVKIGRDGQEIE-----LECGTQLCLLF |
|                                | XP_028912180             | OaYTH<br>DC2 | VR-----YFIMKSSNSRN--LEI--SQQKGVWSTTPVNEGKLNQA--FF-----DSTT-----<br>-----VFLVFS-----VQGS GHFQ-----GFSRM--ISEIGWEKSE-----<br>-----DWGSS-----GL-GGMFKVDWIRKERLPFQQ-THLLNPWNENK-KVQISR DGQELE-----PQIGEQLLKLW   |
| <i>Gallus<br/>gallus</i>       | tr Q5F3J9 Q5F3J9         | GgYTH<br>DF1 | GR-----VFIKSYSEDD--IHR--SIKYTIWCSTEHG NKRLDSA--FR-----SMNSK-----<br>-----GP----VYLLFS-----VNGSGHFC-----GVAEM--KSPVDYGTSA-<br>GVWS-QD-----KW-KGKFDVKWIFVKDVPNNQ-LRHIRLENNDNK-PVTNSRDTQEVH-----LEKAKQVLKII    |
|                                | tr Q5ZLM1 Q5ZLM1         | GgYTH<br>DF3 | GR-----VFIKSYSEDD--IHR--SIKYSIWCSTEHG NKRLDAA--YR-----SLNGK-----<br>-----GP----LYLLFS-----VNGSGHFC-----GVAEM--KSVVDYNAYA-<br>GVWS-QD-----KW-KGKFDVKWIFVKDVPNNQ-LRHIRLENNDNK-PVTNSRDTQ EVP-----LEKAKQVLKII   |
|                                | tr A0A1D5P778 A0A1D5P778 | GgYTH<br>DF2 | GR-----VFIKSYSEDD--IHR--SIKYNIWCS TEHG NKRLDAA--YR-----SMNGK-----<br>-----GP----VYLLFS-----VNGSGHFC-----GVAEM--KSAVDYNTCA-<br>GVWS-QD-----KW-KGRFDVRWIFVKDVPNSQ-LRHIRLENNENK-PVTNSRDTQ EVP-----LEKAKQVLKII  |
|                                | XP_025005417             | GgYTH<br>DC1 | AR-----FFLIKSNNHEN--VSL--AKAKGVWSTLPVNEKKLNAA--FR-----SARS-----<br>-----VILIFS-----VRESGKFQ-----GFARL--SSESHHGGSP-<br>IHWV-LP-----AGMNAK-----ML-GGVFKIDWICRRELPTK-SAHLTNPWNEHK-PVKIGRDGQEIE-----PECGTQLCLLF |
|                                | XP_004949328             | GgYTH<br>DC2 |                                                                                                                                                                                                             |
| <i>Mus<br/>musculus</i>        | sp P59326 YTHD1          | MmYT<br>HDF1 | GR-----VFIKSYSEDD--IHR--SIKYSIWCSTEHG NKRLDGA--FR-----SMSSK-----<br>-----GP----VYLLFS-----VNGSGHFC-----GVAEM--KSPVDYGTSA-<br>GVWS-QD-----KW-KGKFDVKWIFVKDVPNNQ-LRHIRLENNDNK-PVTNSRDTQ EVP-----LEKAKQVLKII   |
|                                | sp Q8BYK6 YTHD3          | MmYT<br>HDF3 | GR-----VFIKSYSEDD--IHR--SIKYSIWCSTEHG NKRLDAA--YR-----SLNGK-----<br>-----GP----LYLLFS-----VNGSGHFC-----GVAEM--KSVVDYNAYA-<br>GVWS-QD-----KW-KGKFEVKWIFVKDVPNNQ-LRHIRLENNDNK-PVTNSRDTQ EVP-----LEKAKQVLKII   |
|                                | sp Q91YT7 YTHD2          | MmYT<br>HDF2 | GR-----VFIKSYSEDD--IHR--SIKYNIWCS TEHG NKRLDAA--YR-----SMNGK-----<br>-----GP----VYLLFS-----VNGSGHFC-----GVAEM--KSAVDYNTCA-<br>GVWS-QD-----KW-KGRFDVRWIFVKDVPNSQ-LRHIRLENNENK-PVTNSRDTQ EVP-----LEKAKQVLKII  |
|                                | sp E9Q5K9 YTHDC1         | MmYT<br>HDC1 | AR-----FFLIKSNNHEN--VSL--AKAKGVWSTLPVNEKKLNLA--FR-----SARS-----<br>-----VILIFS-----VRESGKFQ-----GFARL--SSESHHGGSP-IHWV-<br>LP-----AGMSAK-----ML-GGVFKIDWICRRELPTK-SAHLTNPWNEHK-PVKIGRDGQEIE-----LECGTQLCLLF |
|                                | sp B2RR83 YTHDC2         | MmYT<br>HDC2 | IR-----YFIMKSSNLRN--LEI--SQQKGIWSTTPSNERKLNRA--FW-----ESSM-----<br>-----VYL VFS-----VQGS GHFQ-----GFSRM--SSEIGREKSQ-----<br>-----DWGSA-----GL-GGVFKVEWIRKESLPFQF-AHLLNPWNDNK-KVQISR DGQELE-----PQVGEQLLQLW  |
| <i>Macaca<br/>fascicularis</i> | tr A0A2K5U357 A0A2K5U357 | MfYTH<br>DF1 | GR-----VFIKSYSEDD--IHR--SIKYSIWCSTEHG NKRLDSA--FR-----CMSSK-----<br>-----GP----VYLLFS-----VNGSGHFC-----GVAEM--KSPVDYGTSA-<br>GVWS-QD-----KW-KGKFDVKWIFVKDVPNNQ-LRHIRLENNDNK-PVTNSRDTQ EVP-----LEKAKQVLKII   |

|                             |                          |               |                                                                                                                                                                                                               |
|-----------------------------|--------------------------|---------------|---------------------------------------------------------------------------------------------------------------------------------------------------------------------------------------------------------------|
|                             | tr A0A2K5VFW1 A0A2K5VFW1 | MfYTH<br>DF3  | GR-----VFIKSYSEDD--IHR--SIKYSIWCSTEHGNKRLDAA---YR-----SLNGK-----<br>-----GP----LYLLFS-----VNGSGHFC-----GVAEM--KSVVDYNAYA-<br>GVWS-QD-----KW-KGKFEVKWIFVKDVPNNQ-LRHIRLENNDNK-PVTNSRDTQ EVP-----LEKAKQVLKII     |
|                             | sp Q4R5D9 YTHD2          | MfYTH<br>DF2  | GR-----VFIKSYSEDD--IHR--SIKYNIWCSTEHGNKRLDAA---YR-----SMNGK-----<br>-----GP----VYLLFS-----VNGSGHFC-----GVAEM--KSAVDYNTCA-<br>GVWS-QD-----KW-KGRFDVRWIFVKDVPNSQ-LRHIRLENNENK-PVTNSRDTQ EVP-----LEKAKQVLKII     |
|                             | XP_005555239             | MfYTH<br>DC1  | AR-----FFLIKSNNHEN--VSL--AKAKGVWSTLPVNEKKLNLA--FR-----SARS-----<br>-----VILIFS-----VRESGKFQ-----GFARL--SSESHHGGSP-IHWV-<br>LP-----AGMSAK-----ML-GGVFKIDWICRREL PFTK-SAHLTNPWNEHK-PVKIGRDGQEIE-----LECGTQLCLLF |
|                             | EHH54445                 | MfYTH<br>DC2  | VR-----YFIMKSSNLRN--LEI--SQQKGIWSTTPSNERKLNRA--FW-----ESSM-----<br>-----VYLVFS-----VQGSGHFQ-----GFSRM--SSEIGREKSQ-----<br>-----DWGSA-----GL-GGVFKVEWIRKESLPFQF-AHLLNPWNDNK-KVQISRDGQELE-----PQVGEQLQLW        |
| <i>Pongo<br/>abelii</i>     | tr A0A2J8RB63 A0A2J8RB63 | PaYTH<br>DF1  | GR-----VFIKSYSEDD--IHR--SIKYSIWCSTEHGNKRLDSA--FR-----CMSSK-----<br>-----GP----VYLLFS-----VNGSGHFC-----GVAEM--KSPVDYGTSA-<br>GVWS-QD-----KW-KGKFDVKWIFVKDVPNNQ-LRHIRLENNDNK-PVTNSRDTQ EVP-----LEKAKQVLKII      |
|                             | NP_001124613_YTHD<br>F3  | PaYTH<br>DF3  | GR-----VFIKSYSEDD--IHR--SIKYSIWCSTEHGNKRLDAA---YR-----SLNGK-----<br>-----GP----LYLLFS-----VNGSGHFC-----GVAEM--KSVVDYNAYA-<br>GVWS-QD-----KW-KGKFEVKWIFVKDVPNNQ-LRHIRLENNDNK-PVTNSRDTQ EVP-----LEKAKQVLKII     |
|                             | XP_024105083             | PaYTH<br>DF2  | GR-----VFIKSYSEDD--IHR--SIKYNIWCSTEHGNKRLDAA---YR-----SMNGK-----<br>-----GP----VYLLFS-----VNGSGHFC-----GVAEM--KSAVDYNTCA-<br>GVWS-QD-----KW-KGRFDVRWIFVKDVPNSQ-LRHIRLENNENK-PVTNSRDTQ EVP-----LEKAKQVLKII     |
|                             | XP_024101338             | PaYTH<br>DC1  | AR-----FFLIKSNNHEN--VSL--AKAKGVWSTLPVNEKKLNLA--FR-----SARS-----<br>-----VILIFS-----VRESGKFQ-----GFARL--SSESHHGGSP-IHWV-<br>LP-----AGMSAK-----ML-GGVFKIDWICRREL PFTK-SAHLTNPWNEHK-PVKIGRDGQEIE-----LECGTQLCLLF |
|                             | sp Q5R746 YTHDC2         | PaYTH<br>DC2  | VR-----YFIMKSSNLRN--LEI--SQQKGIWSTTPSNERKLNRA--FW-----ESSM-----<br>-----VYLVFS-----VQGSGHFQ-----GFSRM--SSEIGREKSQ-----<br>-----DWGSA-----GL-GGVFKVEWIRKESLPFQF-AHLLNPWNDNK-KVQISRDGQELE-----PQVGEQLQLW        |
| <i>Poecilia<br/>formosa</i> | XP_007553615             | PfYTH<br>DF1a | GR-----VFIKSYSEDD--IHR--SIKYSIWCSTEHGNKRLDAA---YR-----AMTAK-----<br>-----GP----VYLLFS-----VNGSGHFC-----GVAEM--RSPVDYGTSA-<br>GVWA-QD-----KW-KGKFDVNWLFVKDVPNSQ-LRHIRLENNDNK-PVTNSRDTQ EVP-----LEKAKQVLKII     |
|                             | XP_007557688             | PfYTH<br>DF1b | GR-----VFIKSYSEDD--IHR--SIKYSIWCSTEHGNKRLDSA--FR-----AMNGK-----<br>-----GP----VYLLFS-----VNGSGHFC-----GVAEM--RSPVDYGTSA-<br>GVWA-QD-----KW-KGKFDVDWLFVKDVPNSQ-LRHIRLENNDNK-PVTNSRDTQ EVP-----LEKAKQVLKII      |
|                             | XP_007554569             | PfYTH<br>DF3  | GR-----VFIKSYSEDD--IHR--SIKYSIWCSTEHGNKRLDSA---YR-----SLCNK-----<br>-----GP----LYLLFS-----VNGSGHFC-----GVAEM--RSPVDYNAYA-<br>GVWS-QD-----KW-KGKFEVKWIFIKDVPNNQ-LRHIRLENNDNK-PVTNSRDTQ EVP-----LEKAKQVLKVI     |



|                                  |                          |               |                                                                                                                                                                                                              |
|----------------------------------|--------------------------|---------------|--------------------------------------------------------------------------------------------------------------------------------------------------------------------------------------------------------------|
|                                  | XP_007561175             | PfYTH<br>DF2  | GR-----VFIKSYSEDD--IHR--SIKYNIWCMSTEHGNKRLDAA---YR-----SLAGK-----<br>-----GP----LYLLFS-----VNGSGHFC-----GVAEM--RSPVDYNTSA-<br>GVWS-QD-----KW-KGRFDVRWIFVKDVPNSQ-LRHIRLENNENK-PVTNSRDTQ EVP-----LDKARQVLKII   |
|                                  | XP_007541776             | PfYTH<br>DC1  | AR-----FFLIKSNNHEN--VSL--AKAKGVWSTLPVNEKKLNAA--FQ-----SARS-----<br>-----VILVFS-----VRESGKFQ-----GFARL---SSESHHDGSP-<br>IHWV-LP-----AGMNAK-----ML-GGVFKIDWLCRRELPIK-TAHLFNPWNDNK-PVKIGRDGQEIQ-----PKVGAQLCALF |
| <i>Fundulus<br/>heteroclitus</i> | tr A0A146VPC4 A0A146VPC4 | FhYTH<br>DF1a | GR-----VFIKSYSEDD--IHR--SIKYSIWCSTEHGNKRLDAA---YR-----AMNSK-----<br>-----GP----VYLLFS-----VNGSGHFC-----GMAEM--RSPVDYGTSA-<br>GVWA-QD-----KW-KGKFDVNWLFVKDVPNSQ-LRHIRLENNDNK-PVTNSRDTQ EVP-----LEKAKQVLKII    |
|                                  | tr A0A146N3Z6 A0A146N3Z6 | FhYTH<br>DF1b | GR-----VFIKSYSEDD--IHR--SIKYSIWCSTEHGNKRLDSA--FR-----AMNAK-----<br>-----GP----VYLLFS-----VNGSGHFC-----GVAEM--RSPVDYGTSA-<br>GVWA-QD-----KW-KGKFDVDWLFVKDVPNSQ-LRHIRLENNDNK-PVTNSRDTQ EVP-----LEKAKQVLKII     |
|                                  | tr A0A146XRV8 A0A146XRV8 | FhYTH<br>DF3  | GR-----VFIKSYSEDD--IHR--SIKYSIWCSTEHGNKRLDAA---YR-----SLCNK-----<br>-----GP----LYLLFS-----VNGSGHFC-----GVAEM--RSPVDYNAYA-<br>GVWS-QD-----KW-KGKFEVKWIFIKDVPNNQ-LRHIRLENNDNK-PVTNSRDTQ EVP-----LEKAKQVLKVI    |
|                                  | XP_012720020             | FhYTH<br>DF2  | GR-----VFIKSYSEDD--IHR--SIKYNIWCMSTEHGNKRLDAA---YR-----SLAGK-----<br>-----GP----LYLLFS-----VNGSGHFC-----GVAEM--RSPVDYNTSA-<br>GVWS-QD-----KW-KGRFDVRWIFVKDVPNSQ-LRHIRLENNENK-PVTNSRDTQ EVP-----LDKARQVLKII   |
|                                  | XP_021169391             | FhYTH<br>DC1  | AR-----FFLIKSNNHEN--VSL--AKAKGVWSTLPVNEKKLNSA--FQ-----AARS-----<br>-----VILVFS-----VRESGKFQ-----GFARL---SSQSHHGGSP-<br>IHWV-LP-----AGMNAK-----ML-GGVFRIDWLCRRELPIK-TAHLNPWNDHK-PVKIGRDGQEIA-----PKIGAQLCALF  |
|                                  | XP_012707270             | FhYTH<br>DC2  | VR-----YFIMKSNSIRN--IEI--SQQKGIWSTTPSNETKLTQA--FL-----ANSF-----<br>-----IILVFS-----VQGSGHFQ-----GYARM--TSMVRQDSCQ-----<br>-----DWGFT-----GL-GGVFSVEWIIHKESLPPF-TQHILNPWNDNK-RVQVSRDGQELE-----PQAGSQLLSLW     |
| <i>Nothobranchius furzeri</i>    | XP_015824020             | NfYTH<br>DF1a | GR-----VFIKSYSEDD--IHR--SIKYSIWCSTEHGNKRLDSA--YR-----AMNSK-----<br>-----GP----VYLLFS-----VNGSGHFC-----GVAEM--CSPVDYGTSA-<br>GVWA-QD-----KW-KGKFDVNWLFVKDVPNSQ-LRHIRLENNDNK-PVTNSRDTQ EVP-----LEKAKQVLKII     |
|                                  | XP_015823582             | NfYTH<br>DF1b | GR-----IFIKSYSEDD--IHR--SIKYSIWCSTEHGNKRLDSA--FR-----AMNGK-----<br>-----GP----VYLLFS-----VNGSGHFC-----GVAEM--RSPVDYGTSA-<br>GVWA-QD-----KW-KGKFDVDWLFVKDVPNSQ-LRHIRLENNDNK-PVTNSRDTQ EVP-----LEKAKQVLKII     |
|                                  | XP_015810707             | NfYTH<br>DF3  | GR-----VFIKSYSEDD--IHR--SIKYSIWCSTEHGNKRLDSA--YR-----SLGNK-----<br>-----GP----LYLLFS-----VNGSGHFC-----GVAEM--RSPVDYNAYA-<br>GVWS-QD-----KW-KGKFEVKWIFVKDVPNNQ-LRHIRLENNDNK-PVTNSRDTQ EVP-----LEKAKQVLKVI     |
|                                  | XP_015825357             | NfYTH<br>DF2  | GR-----VFIKSYSEDD--IHR--SIKYNIWCMSTEHGNKRLDAA---YR-----SLSGK-----<br>-----GP----LYLLFS-----VNGSGHFC-----GVAEM--RSPVDYNTSA-<br>GVWS-QD-----KW-KGRFDVRWVFVKDVPNSQ-LRHIRLENNENK-PVTNSRDTQ EVP-----LDKARQVLKII   |

|                              |                          |               |                                                                                                                                                                                                              |
|------------------------------|--------------------------|---------------|--------------------------------------------------------------------------------------------------------------------------------------------------------------------------------------------------------------|
|                              | XP_015798763             | NfYTH<br>DC1  | AR-----FFLIKSNNHEN--VSL--AKAKGVWSTLPVNEKKLNAA--FR-----SARS-----<br>-----VILVFS-----VRESGKFQ-----GFARL--ASESHHGGSP-<br>IHWV-LP-----AGMNAK-----ML-GGVFKINWLCRRELPIK-TAHLSPWNEFK-PVKIGRDGQEIQ-----PTVGAQLCALF   |
|                              | XP_015829646             | NfYTH<br>DC2  | VR-----YFVMKSSNARN--IDI--SQEKGIWSTTPSNETKLTKA--FM-----GHNL-----<br>-----IILIFS-----VQGS GHFQ-----GYAHM--TSAASQESCQ-----<br>-----DWGFV-----GL-GGGFSVEWVHKESLPFHL-TQHILNPWNDNK-KVQISR DGQELE-----PQTGSQ LVLLW  |
| <i>Carassius<br/>auratus</i> | XP_026108152             | CaYTH<br>DF1  | GR-----VFIKSYSEDD--IHR--SIKYSIWCSTEHG NKRLDTA--FR-----GINGK-----<br>-----GP----VYLLFS-----VNGSGHFC-----GVAEM--RSPVDYGTSA-<br>GVWA-QD-----KW-KGKFDVDWLFVKDVPNSQ-LRHIRLENNDNK-PVTNSRDTQ EVP-----LEKAKQVLKII    |
|                              | XP_026057128             | CaYTH<br>DF3  | GR-----VFIKSYSEDD--IHR--SIKYSIWCSTEHG NKRLDGA--YR-----SLSAK-----<br>-----GP----LYLLFS-----VNGSGHFC-----GVAEM--MSTVDYNAYA-<br>GVWS-QD-----KW-KGKFEVKWIFVKDVPNNQ-LRHIRLENNDNK-PVTNSRDTQ EVP-----LEKAKQVLKII    |
|                              | XP_026141540             | CaYTH<br>DF2  | GR-----IFIKSYSEDD--IHR--SIKYNIWCSTEHG NKRLDAA--YR-----SLANK-----<br>-----GP----LYLLFS-----VNGSGHFC-----GVAEM--RSPVDYNTCA-<br>GVWS-QD-----KW-KGRFDVRWIFVKDVPNSQ-LRHIRLENNENK-PVTNSRDTQ EVP-----LDKARQVLKII    |
|                              | XP_026110814             | CaYTH<br>DC1  | AR-----FFLIKSNNHEN--VSL--AKAKGVWSTLPVNEKKLNAA--FR-----SARS-----<br>-----VMLIFS-----VRESGKFQ-----GFARL--SSESHHGGSP-<br>IHWV-LP-----AGMNAK-----ML-GGVFKIDWICRREL PFTK-TAHLSPWNEHK-PVKIGRDGQEIE-----LDCGTQLCMLF |
|                              | XP_026099624             | CaYTH<br>DC2  | IR-----YFIMKSSNMRN--IDL--SQQRGIWSTTPNNEHKLTRA--FI-----ESSA-----<br>-----VFLIFS-----VQGS GHFQ-----GYARM--ASAVSGERCL-----<br>-----DWGSS-----GL-GGVFGVEWIRKESLAFQL-TQQLLNPWNDNK-RVQISRDAQELE-----PQTGSQ LLQLW   |
|                              |                          |               |                                                                                                                                                                                                              |
| <i>Salmo salar</i>           | tr A0A1S3R6T3 A0A1S3R6T3 | SsYTH<br>DF1a | GR-----VFIKSYSEDD--IHR--SIKYSIWCSTEHG NKRLDGA--FR-----GLNFK-----<br>-----GP----VYLLFS-----VNGSGHFC-----GVAEM--RSPVDYGTSA-<br>GVWA-QD-----KW-KGKFDVDWLFVKDVPNSQ-LRHIRLENNDNK-PVTNSRDTQ EVP-----LEKAKQVLKII    |
|                              | tr A0A1S3LGZ9 A0A1S3LGZ9 | SsYTH<br>DF1b | GR-----VFIKSYSEDD--IHR--SIKYSIWCSTEHG NKRLDGA--FR-----SLNGK-----<br>-----GP----VYLLFS-----VNGSGHFC-----GVAEM--RSSVDYGTSA-<br>GVWA-QD-----KW-KGKFDVDWLFVKDVPNSQ-LRHIRLENNDNK-PVTNSRDTQ EVP-----LEKAKQ VMKII   |
|                              | tr A0A1S3LMH3 A0A1S3LMH3 | SsYTH<br>DF1c | GR-----VFIKSYSEDD--IHR--SIKYSIWCSTEHG NKRLDSA--FR-----AINAK-----<br>-----GP----VYLLFS-----VNGSGHFC-----GVAEM--LSPVDYGTSA-<br>GVWA-QD-----KW-KGKFDVDWLFVKDVPNSQ-LRHIRLENNDNK-PVTNSRDTQ EVP-----LEKAKQVLKII    |
|                              | tr A0A1S3MGD6 A0A1S3MGD6 | SsYTH<br>DF1d | GR-----VFIKSYSEDD--IHR--SIKYSIWCSTEHG NKRLDSA--FR-----AINAK-----<br>-----GP----VYLLFS-----VNGSGHFC-----GVAEM--LSPVDYGTSA-<br>GVWA-QD-----KW-KGKFDVDWLFVKDVPNSQ-LRHIRLENNDNK-PVTNSRDTQ EVP-----LEKAKQVLKII    |
|                              | XP_014015013             | SsYTH<br>DF3a | GR-----VFIKSYSEDD--IHR--SIKYSIWCSTEHG NKRLDGA--YR-----SLGAK-----<br>-----GP----LYLLFS-----VNGSGHFC-----GVAEM--RSPVDYNAYA-<br>GVWS-QD-----KW-KGKFEVKWAFVKDVPNSQ-LRHIRLENNDNK-PVTNSRDTQ EVP-----LEKAKQVLKII    |

|                            |              |               |                                                                                                                                                                                                                |
|----------------------------|--------------|---------------|----------------------------------------------------------------------------------------------------------------------------------------------------------------------------------------------------------------|
|                            | XP_014036960 | SsYTH<br>DF3b | GR-----VFIKSYSEDD--IHR--SIKYSIWCSTEHGNKRLDGA---YR-----SLGAK-----<br>-----GP----LYLLFS-----VNGSGHFC-----GVAEM---RSPVDYNSYA-<br>GVWS-QD-----KW-KGKFEVKWAFVKDVPNNQ-LRHIRLENNDNK-PVTNSRDTQ EVP-----LEKAKQVLKII     |
|                            | XP_013979848 | SsYTH<br>DF2a | GR-----VFIKSYSEDD--IHR--SIKYNIWCSTEHGNKRLDAA---YR-----SLGAK-----<br>-----GP----LYLLFS-----VNGSGHFC-----GVAEM---RSPVDYNTCA-<br>GVWS-QD-----KW-KGRFDVRWIFVKDVPNSQ-LRHIRLENNENK-PVTNSRDTQ EVP-----LDKARQVLKII     |
|                            | XP_014065583 | SsYTH<br>DF2b | GR-----VFIKSYSEDD--IHR--SIKYNIWCSTEHGNKRLDAA---YR-----SLGAK-----<br>-----GP----LYLLFS-----VNGSGHFC-----GVAEM---RSPVDYNTCA-<br>GVWS-QD-----KW-KGRFDVRWIFVKDVPNSQ-LRHIRLENNENK-PVTNSRDTQ EVP-----LDKARQVLKII     |
|                            | XP_013994485 | SsYTH<br>DC1a | AR-----FFMIKSNNHEN--VSL--AKAKGVWSTLPVNEKKLNAA---FR-----SARS-----<br>-----VILVFS-----VRESGKFQ-----GFARL---SSESHHGGSP-<br>IHWV-LP-----AGMNAK-----ML-GGVFKIDWICRREL PFTK-TAHLSNSWNEHK-PVKIGRDGQEME-----PEGIQLCVMF |
|                            | XP_014002672 | SsYTH<br>DC1b | TR-----FFLIKSNNHEN--VSL--AKAKGVWSTLPVNEKKLNAA---FR-----SARS-----<br>-----VILVFS-----VRESGKFQ-----GFARL---SSESHHGGSP-<br>IHWV-LP-----AGMNAK-----ML-GGVFKIHWICRREL PFTK-TAHLNPWNEHK-PVKIGRDGQEIE-----PGCGMQLCMLF |
|                            | XP_013984132 | SsYTH<br>DC2  | VR-----YFIMKSSNLRN--LDI--SQQKGIWSTTPSNELKLNRA---FL-----ESSL-----<br>-----VFLVFS-----VQGS GHFQ-----GYARM---TSVIGQERCQ-----<br>-----DWGST-----GL-GGVFSVEWTRKESLPFQC-THQLLPWNDNK-KVQISR DGQELE-----PQAGGQLLQLW    |
| <i>Oncorhynchus mykiss</i> | XP_021422541 | OmYT<br>HDF1a | GR-----VFIKSYSEDD--IHR--SIKYSIWCSTEHGNKRLDGA---FR-----SLNGK-----<br>-----GP----VYLLFS-----VNGSGHFC-----GVAEM---RSSVDYGTSA-<br>GVWA-QD-----KW-KGKFDVDWLFVKDVPNSQ-LRHIRLENNDNK-PVTNSRDTQ EVP-----LEKAKQVMKII     |
|                            | CDQ89726     | OmYT<br>HDF1b | GR-----VFIKSYSEDD--IHR--SIKYSIWCSTEHGNKRLDGA---FR-----SLNGK-----<br>-----GP----VYLLFS-----VNGSGHFC-----GVAEM---RSSVDYGTSA-<br>GVWA-QD-----KW-KGKFDVDWLFVKDVPNSQ-LRHIRLENNDNK-PVTNSRDTQ EVP-----LEKAKQVMKII     |
|                            | XP_021422899 | OmYT<br>HDF1c | GR-----VFIKSYSEDD--IHR--SIKYSIWCSTEHGNKRLDSA---FR-----AINAK-----<br>-----GP----VYLLFS-----VNGSGHFC-----GVAEM---LSPVDYGTSA-<br>GVWA-QD-----KW-KGKFDVDWLFVKDVPNSQ-LRHIRLENNDNK-PVTNSRDTQ EVP-----LEKAKQVLKII     |
|                            | XP_021472143 | OmYT<br>HDF1d | GR-----VFIKSYSEDD--IHR--SIKYSIWCSTEHGNKRLDSA---FR-----AISAK-----<br>-----GP----VYLLFS-----VNGSGHFC-----GVAEM---LSPVDYGTSA-<br>GVWA-QD-----KW-KGKFDVDWLFVKDVPNSQ-LRHIRLENNDNK-PVTNSRDTQ EVP-----LEKAKQVLKII     |
|                            | XP_021475945 | OmYT<br>HDF3a | GR-----VFIKSYSEDD--IHR--SIKYSIWCSTEHGNKRLDGA---YR-----SLGAK-----<br>-----GP----LYLLFS-----VNGSGHFC-----GVAEM---RSPVDYNAYA-<br>GVWS-QD-----KW-KGKFEVKWAFVKDVPNSQ-LRHIRLENNDNK-PVTNSRDTQ EVP-----LEKAKQVLKII     |
|                            | XP_021418082 | OmYT<br>HDF3b | GR-----VFIKSYSEDD--IHR--SIKYSIWCSTEHGNKRLDGA---YR-----SLGAK-----<br>-----GP----LYLLFS-----VNGSGHFC-----GVAEM---RSPVDYNSYA-<br>GVWS-QD-----KW-KGKFEVKWAFVKDVPNNQ-LRHIRLENNDNK-PVTNSRDTQ EVP-----LEKAKQVLKII     |

|                               |                  |               |                                                                                                                                                                                                                  |
|-------------------------------|------------------|---------------|------------------------------------------------------------------------------------------------------------------------------------------------------------------------------------------------------------------|
|                               | XP_021440084     | OmYT<br>HDF2a | GR-----VFIKSYSEDD--IHR--SIKYNIWCSTEHGNKRLDAA---YR-----SLGAK-----<br>-----GP----LYLLFS-----VNGSGHFC-----GVAEM---RSPVDYNTCA-<br>GVWS-QD-----KW-KGRFDVRWIFVKDVPNSQ-LRHIRLENNENK-PVTNSRDTQ EVP-----LDKARQVLKII       |
|                               | XP_021430447     | OmYT<br>HDF2b | GR-----VFIKSYSEDD--IHR--SIKYNIWCSTEHGNKRLDAA---YR-----SLGAK-----<br>-----GP----LYLLFS-----VNGSGHFC-----GVAEM---RSPVDYNTCA-<br>GVWS-QD-----KW-KGRFDVRWIFVKDVPNSQ-LRHIRLENNENK-PVTNSRDTQ EVP-----LDKARQVLKII       |
|                               | XP_021457161     | OmYT<br>HDC1a | AR-----FFLIKSNNHEN--VSL--AKAKGVWSTLPVNEKKLNAA---FR-----SARS-----<br>-----VILVFS-----VRESGKFQ-----GFARL---SSESHHGGSP-<br>IHWV-LP-----AGMNAK-----ML-GGVFKIHWICRREL PFTK-TAHL SNPWNEHK-PVKIGRDGQEME-----PGCGMQLCVTF |
|                               | XP_021478131     | OmYT<br>HDC1b | SS-----LFAYTN-----SMPPVCSVLNMI-----CPP-----<br>---VCSVLN-----MVCPPVRA-----GFARL---SSESHHGGSP-IHWV-LP-----<br>-----AGMNAK-----ML-GGVFKIDWICRREL PFTK-TAHL SNVNEHK-PVKIGRDGQEME-----PGCGMQLCVTF                    |
|                               | XP_021446650     | OmYT<br>HDC2  | VR-----YFIMKSSNLRN--IDI--SQQKGIWSTTPSNELKLNRA---FL-----ESSL-----<br>-----VFLVFS-----VQGSGHFQ-----GYARM---TSVIGQERCQ-----<br>-----DWGST-----GL-GGVFSVEWTRKESLPFQC-THQLLN PWNDNK-KVQISR DGQELE-----PQAGGQLLQLW     |
| <i>Danio rerio</i>            | tr Q802Z0 Q802Z0 | DrYTH<br>DF1  | GR-----VFIKSYSEDD--IHR--SIKYSIWCSTEHGNKRLDSA---FR-----AINGK-----<br>-----GP----VYLLFS-----VNGSGHFC-----GVAEM---RSPVDYGTSA-<br>GVWA-QD-----KW-KGKFDVDWLFVKDVPNSQ-LRHIRLENNDNK-PVTNSRDTQ EVP-----LEKAKQVLKII       |
|                               | tr E7FAP0 E7FAP0 | DrYTH<br>DF3  | GR-----VFIKSYSEDD--IHR--SIKYSIWCSTEHGNKRLDGA---YR-----SLSAK-----<br>-----GP----LYLLFS-----VNGSGHFC-----GVAEM---KSTVDYNAYA-<br>GVWS-QD-----KW-KGKFEVKWIFVKDVPNNQ-LRHIRLENNDNK-PVTNSRDTQ EVP-----LEKAKQVLKII       |
|                               | NP_956544        | DrYTH<br>DF2  | GR-----VFIKSYSEDD--IHR--SIKYNIWCSTEHGNKRLDAA---YR-----SLANK-----<br>-----GP----PYLLFS-----VNGSGHFC-----GVAEM---RSPVDYNTCA-<br>GVWS-QD-----KW-KGRFDVRWIFVKDVPNSQ-LRHIRLENNENK-PVTNSRDTQ EVP-----LDKARQVLKII       |
|                               | NP_001007411     | DrYTH<br>DC1  | AR-----FFLIKSNNHEN--VSL--AKAKGVWSTLPVNEKKLNAA---FR-----AARS-----<br>-----VVLIFS-----VRESGKFQ-----GFARL---SSESHHGGSP-<br>IHWV-LP-----AGMNAK-----ML-GGVFKIDWICRREL PFTK-TAHL ANPWNEHK-PVKIGRDGQEIE-----PECGTELCMLF |
|                               | XP_021332046     | DrYTH<br>DC2  | VR-----YFIMKSSNPRN--IEL--SQQRSVWSTTPNNEQKLNRA---FQ-----NSSA-----<br>-----VFLVFS-----VQGSGHFQ-----GYARM---TSAVSSERCL-----<br>-----DFGSS-----GL-GGVFSVQWIHTESLAFQL-THKLLNPWNDNK-KVQISRDAQELE-----PHTGNQLLQLW       |
| <i>Branchiostoma floridae</i> | XP_002601468     | BfYTH<br>DF   | SR-----FFVIKSYSEDD--IHR--SIKYHIWCSTEHGNKRLDQA---FR-----ERKGK-----<br>-----GP----IYLFFS-----VNGSGHFC-----GVAQM---MSEVDYNADT-<br>GVWS-QE-----KW-KGKLEVKWIFVKDVPNSQ-LRHIRLENNENK-PVTNSRDTQ EVP-----PEKGKQVLKIL      |
|                               | XP_002609689     | BfYTH<br>DC2  | NR-----YFILKCNNQRN--LDI--AMNQSIWATTPSNEKKLNKA---FK-----DCQN-----<br>-----VYL VFS-----VQGSGHFQ-----GYARM---ASSISKDKVP-----<br>-----EFSSA-----SL-GGAFQIEWIKRMSIPFQA-AHLLNPWNENK-KVQISR DGQEI E-----PQVGEQLLKAW     |

|                                       |              |               |                                                                                                                                                                                                                |
|---------------------------------------|--------------|---------------|----------------------------------------------------------------------------------------------------------------------------------------------------------------------------------------------------------------|
| <i>Ciona intestinalis</i>             | XP_002130883 | CiYTH<br>DF   | AR-----FFVIKSYSEDD--IHR--SIKYNIWCSTDHGNKRLDAA---FR-----EQQGH-----<br>-----GP----VILLYS-----VNGSGHFC-----GVAEM---LTQIDYSKRA-<br>GVWA-QD-----KW-KGKFQVKWIYAKDVPNSQ-LRHIRLENNENK-PVTNSRDTQEVP-----AEKGRQVLKII     |
|                                       | XP_002127950 | CiYTH<br>DC1  | AH-----FYLIKSNNHEN--VAL--AKARGVWSTPPSNEAKLNRS---FR-----EARN-----<br>-----VILIYS-----VRESGAFQ-----GFARL---ATEAKHNLSP-<br>IDWV-LP-----AGLSAK-----AL-GGVFKIDWLCKRELSFAK-TTDIYNTFNGNK-PVKIGRDGQEVE-----PNAGKVLCLF  |
| <i>Strongyloce ntrotus purpuratus</i> | XP_011684124 | SpuYT<br>HDF  | SR-----IFIKSYSEDD--IHR--SIKYGIWCSTEHGKNKRLDAA---MR-----ERQSK-----<br>-----GP----VYLIYS-----VNGSGHFC-----GVAEM---MSEVDYTTNT-<br>GVWA-QD-----KW-KGRFDVRWVYVKDVPNSQ-LRHIRLENNDNK-PVTNSRDTQEVL-----LDKAKQVMKII     |
|                                       | NW_022145609 | SpuYT<br>HDC1 | AR-----YFLIKSNNHEN--IAL--AKAKGVWSTLPYNEQRLNAA---FR-----EARN-----<br>-----VLLIFS-----VKESGKFQ-----GFARM---RCESRRDGQP-<br>INWV-LP-----NGMNRS-----IL-GGVFKVDWITRNELPFTK-TTHLYNPWNSDK-PVKIGRDGQEIE-----SKCGESVCRLF |
| <i>Acanthaster planci</i>             | XP_022109588 | ApYTH<br>DF   | SR-----MFIKSYSEDD--IHR--SIKYGIWCSTEHGKNKRLDSA---FR-----ERANK-----<br>-----GP----VYLLYS-----VNGSGHFC-----GVAEM---MSPVDYNVNT-<br>GVWM-QD-----KW-KGRFDVRWVYVKDVPNSQ-LRHIRLENNDNK-PVTNSRDTQEVS-----LDKGRQVVKII     |
|                                       | XP_022105412 | ApYTH<br>DC1  | AR-----YFLIKSNNHEN--VAL--AKARGVWSTLPNNEQMLNQA---FR-----ESRN-----<br>-----VLLIFS-----VKESGKFQ-----GFARM---RSESRRDGPN-<br>INWV-LP-----NGMSRS-----VL-GGVFKIDWITRQELAFSK-TGHLFNSWNDNK-PVKIGRDGQEVE-----TRCGEALCRLF |
|                                       | XP_022100852 | ApYTH<br>DC2  | VR-----FFIVKCNNAMN--IDL--SYSNGLWCVSPSTGQILSNA---FK-----TSQA-----<br>-----IFLIFS-----VQGSGQFE-----GFGRM---TSDLQYKQTI--DW---<br>-----RDSCM-----RN-GAEFGVQWMKRASVSFDQ-TRAILNPWNDNL-RVHVSRDGQELE-----PSVGQNLLQLW   |
| <i>Lingula anatina</i>                | XP_013381791 | LaYTH<br>DF   | SR-----FFIIKSYSEDD--IHR--SIKYSIWCSTDHGNKRLDTA---YR-----QQEGK-----<br>-----GP----VYLLFS-----VNGSGHFC-----GVAQM---LSPIDYNRTS-<br>GVWA-QD-----KW-KGQFEVKWIYVKDVPNSQ-LRHIRLENNENK-PVTNSRDTQEVP-----LEKGKQVMKIL     |
|                                       | XP_013407344 | LaYTH<br>DC1  | AT-----YFIIKSNNHEN--VAL--AKAKGVWSTPPQNEFRINKA---YR-----ESRN-----<br>-----VILIFS-----VRESGKFQ-----GYARV---ASESDKDHPP-<br>IRWV-LP-----PGLSAK-----AL-SGVFKLDWVTRRDLPFTK-TAHLNPWNDNK-PVKIGRDGQPVE-----PRCGEALCRMF  |
|                                       | XP_013406748 | LaYTH<br>DC2  | CC-----YFVIKCNDKQ--LDA--SFNRGIWGPQIQTERKLVKA---FR-----EGKV-----<br>-----VYLIFS-----VQGSGHFQ-----GFAKM---LAEPIKEKAP-----<br>-----EFNYP-----GL-GGTLSIQWIKRANLPFKN-THHLTNPWNENR-RVQISRDGQEIE-----PSIGAQLIQLW      |
| <i>Octopus bimaculoide s</i>          | XP_014787225 | ObYTH<br>DF   | AR-----FFIIKSYSEDD--IHR--SIKYNIWCSTEHGKNKRLDGA---YR-----EREGK-----<br>-----GP----VYLFYS-----VNGSGHFC-----GMAQM---MSPVDYSTNS-<br>GVWA-QD-----KW-KGQFEVKWIYVKDVPNSQ-LRHIRLENNENK-PVTNSRDTQEVP-----PEKGKQVLKIL    |
|                                       | XP_014768358 | ObYTH<br>DC1  | AR-----FFLIKSNNHEN--VAL--AKAKGVWSTPPQNEARLNQA---FR-----EADN-----<br>-----VILVFS-----VKESGKFQ-----GFARL---SAESTRDHPP-<br>IRWV-LP-----PGLSAR-----AL-SGVFKLDWINRRDLQFTK-TTHLHNPWNENK-YVKIGRDGQEIE-----PTVGEALCKLF |

|                                |              |               |                                                                                                                                                                                                                |
|--------------------------------|--------------|---------------|----------------------------------------------------------------------------------------------------------------------------------------------------------------------------------------------------------------|
|                                | XP_014778535 | ObYTH<br>DC2  | TSNNQRN--LDT--SFSKSIWTTSPNNEKKLNKA---FQ-----DGKT-----<br>VYLIFS-----IQGSGCFQ-----GYAKM--LSTFSKDRSA-----<br>EYSMP-----GL-GATCTVDWLKRGNIPFHN-VQHLSNPWNDNK-RIQVSRDCQEIE-----PFVGETLLKQW                           |
| <i>Mizuhopecten yessoensis</i> | OWF49575     | MyYTH<br>DF   | AR-----FFVIKSYSEDD--IHR--SIKYSIWCSTEHGNKRLDSA--YK-----ERESK-----<br>-----GP----IYLFYS-----VNGSGHFC-----GMAQM--MSTLDYNRSP-<br>GVWA-QD-----KW-KGQLDVKWIYVKDVPNSQ-LRHIRLENNENK-PVTNSRDTQ EVP-----PEKGKQVLKLL      |
|                                | XP_021370725 | MyYTH<br>DC1  | AR-----YFLIKSNNHEN--VAL--AKAKGVWSTPPQNEAKLNQA--FR-----SCDN-----<br>-----VILIFS-----VKESGKFQ-----GFARI--VEESTKDHPP-<br>IRWV-LP-----PGLSAR-----AL-SGVFKLDWINRRELSFTK-TSHLHNSWNDNK-PVKIGRDGQEIE-----ARCGETVCKMF   |
|                                | XP_021349616 | MyYTH<br>DC2  | FFVMKCNNQSK--VDL--SMNKGVWATNKSNNKKLSV--FQ-----EGNT-----<br>-----VYLVFS-----VQGSGHFQ-----GYAKM--KSEFVDKKVQ-----<br>-----DSSYH-----GL-DYCCDVEWIKRANLSFQS-TLQLLNPWDDNR-KVQTSRDGQEIE-----PHVGETLIKLW               |
| <i>Pomacea canaliculata</i>    | XP_025090552 | PcYTH<br>DF   | AR-----FFIIKSYSEDD--IHR--SIKYNIW CSTEHGNKRLDQA--FR-----EREGK-----<br>-----GP----VYLIYS-----VNGSGHFC-----GIAQM--VSPVDYNKNS-<br>GVWA-QD-----KW-KGQFEVKWVYVKDVPNSQ-LRHIRLENNENK-PVTNSRDTQ EVP-----PEKGKQVLKIL     |
|                                | XP_025111582 | PcYTH<br>DC1  | AR-----FFLIKSNNHEN--VAL--AKAKGVWSTPPQNEARLNQA--FR-----ECDN-----<br>-----VILVFS-----VKESGKFQ-----GFARL--AAESTKDHPP-<br>IRWV-LP-----QGMNSR-----AL-SAVFKLDWVCRREL PFTK-TNHLHNPWDDK-PVKIGRDGQEID-----PRCGESLCKLF   |
|                                | XP_025077319 | PcYTH<br>DC2  | CR-----YFVMKCNNQRN--LDI--SQSKGIWATSPANQAKMNRA--FR-----DGKT-----<br>-----VYLIFS-----IQGSGHFQ-----GYAKM--LTEIGRHKSP-----<br>-----DFASP-----GL-TGTF AVEWIKRANIPFMS-THHLYNTWNENR-KVQVSRDGQELE-----PGVGEALVKLW      |
| <i>Aplysia californica</i>     | XP_005091424 | AcaYT<br>HDF  | AR-----FFIIKSYSEDD--IHR--SIKYNIW CSTDHGNKRLDQA--FR-----EREGK-----<br>-----GP----VYLIYS-----VNGSGHFC-----GIAQM--MSPVDYNKSA-<br>GVWA-QD-----KW-KGQFTVKWVYVKDVPNST-LRHIRLENNENK-PVTNSRDTQ EVP-----PEKGKQVLRIM     |
|                                | XP_005104889 | AcaYT<br>HDC1 | AR-----FFLVKSNNHEN--VAL--AKAKGIWSTPPQNEARFNQA--FK-----ECEN-----<br>-----VILIFS-----VKESGKFQ-----GFARL--AEESTKDHPP-<br>VRWV-LP-----PGMTSR-----AL-SGVFKLDWVSRKDLEFIK-TNHLFNLWNDNK-RVKIGRDGQEIE-----PRCGENLCKLF   |
|                                | XP_005089719 | AcaYT<br>HDC2 | FFIMKAANHKL--LEI--SQTKNFWATSTGHEGKLSKA--YM-----SGRV-----<br>-----VYLIFS-----VQGSGHFQ-----GFAKM--TSSIARTKSP-----<br>-----DFPSP-----GL-SAIFSVEWLKSAHLPFQL-CHHLLNPWNENK-KVQESRDGQELE-----AHVGSQLLKLW              |
| <i>Crassostrea gigas</i>       | XP_011456337 | CgYTH<br>DF   | AR-----FFIIKSYSEDD--IHR--SIKYSIWCSTDHGNKRLDQA--FK-----ERDNK-----<br>-----GP----IYLFFS-----VNGSGHFC-----GMAQM--MSSLDYGKQA-<br>GVWA-QD-----KW-RGQFEVKWIYVKDVPNSQ-LRHIRLENNENK-PVTNSRDTQ EVP-----PEKGKSVLKIM      |
|                                | XP_011447601 | CgYTH<br>DC1  | AR-----YFLIKSNNHEN--VAL--AKAKGVWSTPPQNEIRLNNA--YK-----SCDN-----<br>-----VILIFS-----VRESGKFQ-----GFARI--ADESTKDHPP-<br>IRWV-LP-----PGLSAR-----AL-SGVFKLDWINRKEL AFTK-TQHLHNAWNDNK-PVKIGRDGQ EVE-----PRCGEALCKMF |

|                                   |              |               |                                                                                                                                                                                                                |
|-----------------------------------|--------------|---------------|----------------------------------------------------------------------------------------------------------------------------------------------------------------------------------------------------------------|
|                                   | XP_011425711 | CgYTH<br>DC2  | VK-----YFVVKPNNQKA--LDI--ALSNSVFATTPKSETKFNKA---IQ-----DGKE-----<br>-----VYLIFS-----MIDSAQFQ-----GYAKV---TAQSSQDKCP-----<br>-----DMSGD-----GL-GGTFKIEWMKKTPVPFRA-TQNICNSWNENK-KVQYSKDGQELE-----YSCGERLIQVL     |
| <i>Biomphalar<br/>ia glabrata</i> | XP_013083543 | BgYTH<br>DF   | AR-----FFIIKSYSEDD--IHR--SIKYNIW CSTDHGNKRLDQA--FR-----EREGK-----<br>-----GP----VYLIYS-----VNGSGHFC-----GIAQM---MSPVDYNKSA-<br>GVWA-QD-----KW-KGQFVVKWVYVKDVPNSQ-LRHIRLENNENK-PVTNSRDTQEV-----PEKGKQVLRIV      |
|                                   | XP_013071333 | BgYTH<br>DC1  | AR-----FFLVKSNNHEN--VAL--AKAKGVWSTPPQNEARFNQA--FR-----ECDN-----<br>-----VILIFS-----VKESGKFQ-----GFARL---SEESTKDHP-<br>IRWV-LP-----PGMTSR-----AL-SGVFRLDWITRRDLDFQK-TNHLFNAWNDNK-RVKIGRDGQEIE-----PRCGESLCKLF   |
|                                   | XP_013089748 | BgYTH<br>DC2  | GR-----YFLMRCNNQKI--VDV--SETKGIWATSVSNETKLNRA--FN-----SGKP-----<br>-----VYLIFS-----VPGNANFQ-----GYAKM---TSLISKNRSP-----<br>-----DFPGS-----GL-TGTFSVSWVKRATIPFSN-TNFLNNPWNENR-RVHTGRDGQEIE-----PKIGLELIKW       |
| <i>Drosophila<br/>hydei</i>       | XP_023169635 | DhYTH<br>DF   | AR-----FFVIKSYSEDD--IHR--SIKYEIWCSTDHGNKRLDDA--FK-----ERQKE-----<br>-----GGN----VLLFFS-----VNKSGYFC-----GMAQM---MTSVDYNSTS-<br>SVWS-QD-----KW-KGKFKVKWIYVKDVPNGE-LRHIRLENNDNK-SVTHSRDTQEIP-----NTKGIEVLQIL     |
|                                   | XP_023173281 | DhYTH<br>DC1  | TR-----FFLIKSNNSDN--VQL--SKNKS VWATLPQNDANLSQA--FK-----EARN-----<br>-----VLLIFS-----VNESGKFA-----GFARM---AAPSRRDIPQ-<br>VAWV-LP-----PSISPK-----AL-GGVIELDWICKELSFNA-TLHLHNTWNEGK-PVKIGRDGQEIE-----PKIGAELCRLF  |
| <i>Stomoxys<br/>calcitrans</i>    | XP_013113692 | ScaYTH<br>DF  | AR-----FFVIKSYSEDD--IHR--SIKYEIWCSTDHGNKRLDDA--FK-----ERHKD-----<br>-----GGN----ILLFFS-----VNGSGHFC-----GMAQM---MTPVDYNSTS-<br>SVWS-QD-----KW-KGKFKVKWIYVKDVPNNK-LRHITLENNENK-PVTNSRDTQEV-----NAKGIEVLQIL      |
|                                   | XP_013118835 | ScaYTH<br>DC1 | TR-----FFLIKSNNADN--VTL--SKNKNVWATLPQNDANLTQA--FK-----ESRN-----<br>-----VLLIFS-----VNESGKFA-----GFARM---SASSSRDIPQ-<br>PDWV-LP-----SSISAK-----AL-GGVIEIDWICKELSFNC-TSHLYNSWNEGK-PVKIGRDGQEIE-----PKVGAELCRLF   |
| <i>Lucilia<br/>cuprina</i>        | XP_023298015 | LcYTH<br>DF   | AR-----FFVIKSYSEVD--VHR--SIKYEIWCSTDHGNKRLDDA--FK-----ERSKD-----<br>-----GGN----ILLFFS-----VNGSGHFC-----GMAQM---MTSVDYNSTS-<br>SVWS-QD-----KW-RGKFKVKWIYVKDVPNKE-LRHITLENNENK-PVTNSRDTQEV-----HAKGIEVLQIL      |
|                                   | XP_023292455 | LcYTH<br>DC1  |                                                                                                                                                                                                                |
| <i>Habropoda<br/>laboriosa</i>    | KOC65487     | HIYTH<br>DF   | AR-----FFVIKSYSEDD--IHR--SIKYEIWCSTE HGNKRLDQA--YR-----EASRE-----<br>-----GAP----LYLFFS-----VNGSGHFC-----GMAQM---VSPVDYKSNS-<br>SVWS-QD-----KW-KGQFRVRWIYVKDVPNVQ-LRHIKLENNENK-PVTNSRDAQEV-----HAKGVTVLRIL     |
|                                   | XP_017789685 | HIYTH<br>DC1  | AR-----FFIIKSNN AEN--VTL--SKAKGVWSTLPQNEANLNQA--YR-----ESRN-----<br>-----VLLVFS-----VKESGKFA-----GFARL---STESRRDGAP-<br>ISWV-LP-----PGLSAK-----AL-GGVFKVDWICKELPFTA-TLHL YNPWNDGK-QVKIGRDGQEIE-----PRVAEELCRLF |
| <i>Pieris rapae</i>               | XP_022130163 | PrYTH<br>DF   | TR-----FFVIKSYSEDD--IHR--SIKYEIWCSTE HGNKRLDSA--FR-----DRERE-----<br>-----GGS----VYLFFS-----VNGSGHFC-----GMARM---VSAVDYNSNS-<br>SVWS-QD-----KW-KGQFRVRWIYVKDVPNGQ-LRHIKLENNENK-PVTNSRDTQEV-----HAKGLQVLRIM     |

|                                   |              |              |                                                                                                                                                                                                               |
|-----------------------------------|--------------|--------------|---------------------------------------------------------------------------------------------------------------------------------------------------------------------------------------------------------------|
|                                   | XP_022113565 | PrYTH<br>DC1 | TR-----FFLIKSNNNAEN--ITL--SKAKGVWSTLPQNEANLNQA---YR-----ESRN-----<br>-----VLLIFS-----VKESGKFA-----GFARL--GSESRRDVPA-<br>VSWV-LP-----PGLSAK-----VL-DGVFKVDWICKELPFSS-TLHLYNPWNEGK-PVKIGRDGQEIE-----PKVAEELCRLF |
|                                   | XP_022129346 | PrYTH<br>DC2 | SR-----YFIVKADDLHS--VEM--AQASGSYPFTQNTIKKLQKA--KQ-----EGSR-----<br>-----VIMIFS-----CAGASKIT-----GAAAL-----GEA-----<br>-----AS--PLDWISNNHIPFHM-LRHITNGLAGGA-RVTGARDGTELC-----STSGRGLLAAL                       |
| <i>Frankliniella occidentalis</i> | XP_026290617 | FoYTH<br>DF  | AR-----FFVIKSYSEDD--IHR--SIKYEIWCSTEHGKRLDEA---YR-----EREAE-----<br>-----GGI----VLLFFS-----VNGSGHFC-----GMAQM--ISPLDYNASS-<br>SVWS-QD-----KW-KGQFGVRWIYVKDVPNVQ-LRHIRLENNENK-PVTNSRDTQEV-----FEKGRQVLRIM      |
|                                   | XP_026272952 | FoYTH<br>DC1 | AR-----FFVIKSNNNAEN--VTL--SKAKGVWSTLPQNETKLNQA--FK-----ESRN-----<br>-----VLLIFS-----VKESGRFA-----GFARL--NGESRHDVAP-<br>ISWV-LP-----PGLSAK-----AL-GGVFKVDWVCRKELPFTA-TMHLYNPWNEGK-PVKIGRDGQEIE-----PRVAEELCRLF |
|                                   | XP_026287428 | FoYTH<br>DC2 | R-----YFIKAGNPRA--INA--SLRENVWAFTATTENKLITV---FR-----EGFA-----<br>-----VMLIFS-----IHGSGNFQ-----GVASL---VSDVSDVRDSGKVHV-<br>Q-----DMAGP-----NL-CSPLPIKWLYGDIPFHA-TRNIMNPYNENR-NIQTSRDGQEVE-----PHVASQLCKLW     |
| <i>Hypoasmoco ma kahamanoa</i>    | XP_026323400 | HkYTH<br>DF  | AR-----FFVIKSYSEDD--IHR--SIKYEIWCSTEHGKRLDAA---FR-----ERERE-----<br>-----GGM----VYLFFS-----VNGSGHFC-----GMARM--MSAVDYNSSNS-<br>SVWS-QD-----KW-KGQFRVKWIYVKDVPNVQ-LRHIKLENNENK-PVTNSRDTQEV-----HAKGLQVLRIM     |
|                                   | XP_026316753 | HkYTH<br>DC1 | TR-----FFLIKSNNNAEN--ITL--SKAKGVWSTLPQNEANLNQA---YR-----ESRN-----<br>-----VLLIFS-----VKESGRFA-----GFARL--ASESRRDVPP-ISWV-<br>LP-----PGLSAK-----VL-DGVFKVDWICKELPFNS-TLHLYNPWNEGK-PVKIGRDGQEIE-----PKVAEELCRLF |
|                                   | XP_026333402 | HkYTH<br>DC2 | VR-----YFVVKTDDIHS--VEAA-AQNNGTFAFSPNTAKKLQKV---KQ-----EGHR-----<br>-----VVLFFS-----CAASSKFV-----GCASL-----LDP--<br>-----NG--TLDWAHAHQLPFHM-VRHISNSLAGGA-RIAGARDGTELC-----PASGRALYAAL                         |
| <i>Bombyx mori</i>                | XP_004924605 | BmYTH<br>DF  | TR-----FFVIKSYSEDD--IHR--SIKYEIWCSTEHGKRLDAA---YR-----EREKE-----<br>-----GGM----VYLFFS-----VNGSGHFC-----GMARM--MSAVDYNSSNS-<br>SVWS-QD-----KW-KGQFRVKWIYVKDVPNAQ-LRHIKLENNENK-PVTNSRDTQEV-----HPKGLQVLRIM     |
|                                   | XP_004931496 | BmYTH<br>DC1 | TR-----FFLIKSNNNAEN--ITL--SKARGVWSTLPQNEANLNQA---YR-----ESRN-----<br>-----VLLIFS-----VKESGKFA-----GFARL--GSESRRDVPP-ISWV-<br>LP-----PGLSAK-----VL-DGVFKVDWICKELSFNS-TLHLYKPWNEGK-PVKIGRDGQEIE-----PKVAEELCRLF |
|                                   | XP_012544932 | BmYTH<br>DC2 | AK-----QFMIVDELHA--LEA--AYSTGSYVFAQNIAKRLQKA--KM-----EGHR-----<br>-----VTVFFS-----CPSANKFV-----GCANL-----LDV--<br>-----SG--ALEWISTQHVPYHM-VRH---SCGGA-RGCVWREG-ELC-----GAGGGALLAHS                            |
| <i>Tribolium castaneum</i>        | XP_015835734 | TcYTH<br>DF  | AR-----FFVIKSYSEDD--IHR--SIKYEIWCSTEHGKRLDQA---YR-----EREAH-----<br>-----GA----VYLFFS-----VNGSGHFC-----GMAQM--VSPVDYNANS-<br>SVWS-QD-----KW-KGQFKVRWIYVKDVPNVQ-LRHIRLENNENK-PVTNSRDTQEV-----HAKGLQVLRIM       |



|                                         |              |               |                                                                                                                                                                                                               |
|-----------------------------------------|--------------|---------------|---------------------------------------------------------------------------------------------------------------------------------------------------------------------------------------------------------------|
|                                         | XP_969804    | TcYTH<br>DC1  | AR-----FFVIKSNNAEN--ITL--SKAKGVWSTLPQNEANLNKA---YR-----ESRN-----<br>-----VLLIFS-----VKESGKFA-----GFARL--HSESRHDTVPA-<br>ISWV-LP-----PGLSAK-----AL-GGVFKVDWICKELPFSN-TMHLYNPWNDGK-PVKIGRDGQEIE-----PRVAEELCRLF |
|                                         | XP_008198757 | TcYTH<br>DC2  | SV-----FLLIKVKQECs--VKI--AFDSNKWIFSPQTEKQVMAL--DNGGMN-----<br>-----VYLVYT-----VQKLNAFY-----GIAKY--LT-----<br>FDTT-----RH-KTSAAIEWIFKSCVPYKS-VSHLRNALNNNR-LIYDGLDGQEIE-----MGAALQLW                            |
| <i>Priapulus<br/>caudatus</i>           | XP_014679284 | PcaYTH<br>DFa | SR-----FFVIKSYSEDD--IHR--SIKYSIWCSTEHGKNKRLDTA---FK-----ERDSK-----<br>-----GS---VYLFFS-----VNGSGHFC-----GLAEM--LTPIDHDTKS-<br>SVWA-QD-----KW-KGQFQVRWIYVKDVPNSA-LRHIRLENNENK-PVTNSRDTQEVp-----ADKGKQVLKIM     |
|                                         | XP_014672005 | PcaYTH<br>DFb | AR-----FFIIKSYSEDD--IHR--SIKYSIWCSTEHGNNRRLDQA---FK-----ERHGK-----<br>-----GP---VYLLFS-----VNGSGHFC-----GVAQM--LSEVDYDTQS-<br>GVWA-QS-----KW-KGQFQVKWIYVKDVPNSQ-LRHIRLENNENK-PVTNSRDTQEVp-----FEQGKQVLKII     |
|                                         | XP_014667135 | PcaYTH<br>DC1 | SA-----YFLIKSNNHEN--ISL--AKAKGVWSTPPQNEAKLNKA---FK-----ECRN-----<br>-----VILVYS-----VKESGKFQ-----GYARL--SSESRHDIAP-<br>PQWV-LP-----PGMTSR-----AL-GGVFKIDWVNRKELAFSK-TLHLHNSWNENK-PVKIGRDGQEIE-----HNCGESLCRLF |
| <i>Clonorchis<br/>sinensis</i>          | RJW65808     | CsYTH<br>DF   | AR-----FFVIKSFSEDD--IHR--SIKYSVWCSTELGNKKLDSA---YV-----GANNQ-----<br>-----YP----IYLFFS-----VNGSGHFC-----GMAEM--TSRVDYDTRV-<br>RVWA-QD-----KW-QGAFSVRWIFVKDVPNTA-LRHIRIESNENK-PVTHSRDATELP-----LERGRQVMEVF     |
|                                         | RJW63992     | CsYTH<br>DC1  | AR-----YFMIKSNNYEN--VEI--AKTRNVWSTTKGNETRLNKA---FF-----DCPN-----<br>-----VFLIFS-----VRESGKFQ-----GFAQI--IASSDPRI-K-VNWV-<br>LP-----PRMDIN-----LL-SNPFRIKWISKRDLPFSK-VNHLTNPWNENK-PVKIGRDGQEIE-----GVCGEALCRLl |
| <i>Opisthorchi<br/>s viverrini</i>      | OON14740     | OvYTH<br>DF   | AR-----FFVIKSFSEDD--IHR--SIKYSVWCSTELGNKKLDSA---YV-----GANNQ-----<br>-----YP----IYLFFS-----VNGSGHFC-----GMAEM--TSRVDYDTRV-<br>RVWA-QD-----KW-QGAFSVRWIFVKDVPNTA-LRHIRIESNENK-PVTHSRDATELP-----LERGRQVMEVF     |
|                                         | XP_009167386 | OvYTH<br>DC1  | AR-----YFMIKSNNYEN--VEI--AKTRNVWSTTKGNETRLNKA---FF-----DCPN-----<br>-----VFLIFS-----VRESGKFQ-----GFAQI--IASSDPRI-K-VNWV-<br>LP-----PRMDIN-----LL-SNPFRIKWISKRDLPFSK-VNHLTNPWNENK-PVKIGRDGQEIE-----GVCGEALCRLl |
| <i>Schistosoma<br/>haematobiu<br/>m</i> | XP_012796317 | ShYTH<br>DF   | AR-----FFVIKSFSEDD--IHR--SIKYSIWCSTELGNKKLDTA---FA-----EANHA-----<br>-----YP----IYLFFS-----VNGSGHFC-----GMAEM--VSRVDYNARA-<br>SVWA-QD-----KW-QGKFsvRWIFVKDVPNTA-LRHIRIETNDNK-PVTHSRDTTELP-----LERGKQVMEVL     |
|                                         | XP_012801596 | ShYTH<br>DC1  | TK-----YFLIKSNNFEN--IEI--AKSRNVWATTKGNETRLNKA---FF-----DyNN-----<br>-----VLLIFS-----VRESGRFQ-----GFARI--IASSDPRI-K-VDWV-<br>LS-----SRMSTG-----LL-SNPFRIKWISKSDLPFTK-TGHLLNAWNEDK-PVKIGRDGQEIE-----PTCGEALCRCF |
| <i>Orbicella<br/>faveolata</i>          | XP_020606490 | OfYTH<br>DF   | AR-----FFIIKSYSEDD--IHR--SIKYSVWTSTEHGNNRRLNEA---FK-----EQQGA-----<br>-----KAP----IYLLFS-----VNGSGHFC-----GIAMM--MSEVDLEIET-<br>GIWS-QD-----KW-KGKFEVKWFYVKDVPNNA-LRHIRLENNDNK-PVTNSRDTQEVp-----PEKGKQVLKII   |

|                                               |              |               |                                                                                                                                                                                                                                                   |
|-----------------------------------------------|--------------|---------------|---------------------------------------------------------------------------------------------------------------------------------------------------------------------------------------------------------------------------------------------------|
|                                               | XP_020617190 | OfYTH<br>DC1  | AR-----YFVMKSNNHEN--VAL--SKAKGVWSTPKANEKKLNAT---FK-----RYKN-----<br>-----VILIFS-----VKESGKFQ-----GFARL---ASEAKHGGQP-<br>MPWV-LP-----PGMSAK-----AL-GGVFKLEWLNRRRELWFSK-CLHLRNPWNDNK-EVKICRDGQEVE-----PSVGEALCRLF                                   |
|                                               | XP_020627768 | OfYTH<br>DC2  | AR-----YFIMKCNNQRN--LDI--SMAKGIWATTLANEKKLNRA---FK-----ETKL-----<br>-----VILVFS-----VQGS GHFQ-----GYAQM---TSPIGKDKSP-----<br>-----EFGSS-----SL-SGVFSVEWIKKASIPFQQ-AHHLVNPWNDHK-KVQISR DGQELE-----PKIGEDLCKLW                                      |
| <i>Exaiptasia<br/>pallida</i>                 | XP_020892001 | EpYTH<br>DF   | AR-----FFIIKSYSEDD--IHR--SIKYSVWTSTEHGNRRLNEA---FK-----EQSKS-----<br>-----GP----IYLIFS-----VNGSGHFC-----GIAQM---MSDVDFDIET-<br>GIWS-QD-----KW-KGKFDVKWFYVKDVPNNA-LRHIRLENNDNK-PVTNSRDTQEIP-----PDKARQVVKII                                        |
|                                               | XP_020896581 | EpYTH<br>DC1  | AR-----YFVMKSNNNAEN--VLL--SKAKGVWSTPRTNEKKLSSA---FR-----RYKN-----<br>-----VIVIFS-----VKESGKFQ-----GMARL---MGEATYGGPQ-<br>IPWV-LP-----PGMSAK-----AL-GGVFPIKWLN RQDLWFSK-CTHLRNPWNDNK-EVKICRDGQEVE-----PTVGEQLCRLF                                  |
|                                               | KXJ22716     | EpYTH<br>DC2  | AR-----YFIIKCNNQRN--LSI--SMAKGIWATTIANEKKLNRA---FR-----ECKK-----<br>-----IVLIFS-----VQGS GHFQ-----GFAHM---ASPIGKDKSP-----<br>-----EFGSS-----SL-GGVFKVDWIKKANIPFQE-AHHLVNPWNDHK-KVQISR DGQELE-----PTVGADLCKLW                                      |
| <i>Stylophora<br/>pistillata</i>              | XP_022806830 | SpiYTH<br>DF  | AR-----FFIIKSYSEDD--IHR--SIKYSVWTSTEHGNRRLNDA---FK-----EQQSS-----<br>-----KAP----IYLLFS-----VNGSGHFC-----GIAMM---TSEVDIEIET-<br>GIWT-QD-----KW-KGKFDVKWFYVKDVPNNA-LRHIRLENNDNK-PVTNSRDTQ EVP-----PEKGKQVLKII                                      |
|                                               | PFX31771     | SpiYTH<br>DC2 | AR-----YFIMKCNNQRN--LDI--SMAKGIWATTLANEKKLNKA---FK-----ESKH-----<br>-----VMLVFS-----VQGS GHFQ-----GYAQM---TSPIGKDKSP-----<br>-----EFGSS-----SL-SGVFSVEWMKKASIPFQQ-AHHLVNPWNDHK-KVQISR DGQELE-----PKIGEELCMLW                                      |
| <i>Amphimedo<br/>n<br/>queenslandi<br/>ca</i> | XP_003386824 | AqYTH<br>DF   | AR-----FFVIKSYAEDD--VHR--SIKYNVWCSTDHGNRRLDTA---FK-----EQKSK-----<br>-----GGG----VYLLFS-----VNGSGHFC-----GVAQM---<br>MSEVELSTD T-GIWT-QD-----KW-KGRFDIRWIYVKDVPNNQ-LRHIRLENNENK-PVTNSRDTQ EVP-----VDKGKLVIKII                                     |
|                                               | XP_019850317 | AqYTH<br>DC1  | TR-----YFVIKSNNYEN--VDI--AKSKNVWSTLPYNEKKLNKA---YR-----DCRN-----<br>-----VLLIFS-----VKESGGFQ-----GFAKL---VSESRS DVPR-<br>VHWV-LP-----PSMSAS-----QL-SHVFKLDWIIHKGTLAFNL-CQDLKNPW NENK-PVKIGR DGQEIE-----PSVGEKLCKLW                                |
| <i>Selaginella<br/>moellendorf<br/>fii</i>    | XP_024531733 | SmYTH<br>DC1B | TR-----YFIIKSLNHQN--LSK--SVERGVWATPAVNEDILNEA---FQ-----TSER-----<br>-----VVLVFS-----VNMSGYFQ-----GYAEM---TSRPGR RKD--<br>NLWN-DA-----NDGSS-----PW-GGVFSVDWLKLHDLPFQE-TSHLKNPLDDNK-PVKISKDCQELP-----REVGESLCALI                                    |
|                                               | XP_024516925 | SmYTH<br>DC1A | SR-----YFIVKSSNREN--LEL--SVRRGVWATHRNNEAKLNEA---LE-----SCEH-----<br>-----VILIFS-----<br>VNETRHFQVSSLSTFFPSLFHDPFVSLRNQHKLCCVFLRLCCSQGCARM---MSKAGGA AHGTAGWK-QS-----HGMGS-----Y-<br>GRNFRLKWLKLCELSFHK-TRHLHNPYNENL-PVKISRDCQEVE-----PSVGQELAE LL |
|                                               | XP_002961786 | SmYTH<br>DF1  | AK-----FFIIKSYSEDD--VHK--SIKYG VWASTPNGNKRLDAA---YK-----EAAGE----F-----<br>-----P----IFLFFS-----VNGSQFC-----GVAEM---SGPMDFLRSV-<br>DFWQ-QD-----KW-TGRFSVKWHFIKDITNGH-FRHIILENNDNK-PVTNSRDTQ EVQ-----LDQGLEMLRIF                                   |

|                    |                  |               |                                                                                                                                                                                                                        |
|--------------------|------------------|---------------|------------------------------------------------------------------------------------------------------------------------------------------------------------------------------------------------------------------------|
| Phaseolus vulgaris | Phvul.002G152600 | PvYTH<br>DC1B | IK-----YFIIKSLNREN--IDL--SIKKGIWATQIMNERILEEA---FH-----NSGC-----<br>-----VILIFS-----VNMSGSFQ-----GYAQM--MSSIGRGRD--NVWS-<br>EG-----IGKSN-----PW-GRSFKVQWLCFNDLPFYK-TLHLKNPLNDYK-PVKISRDCQELS-----PDIGLALCELL           |
|                    | Phvul.006G130200 | PvYTH<br>DC1A | SR-----YFIVKSCNREN--LEL--SVQQGVWATQRSNESKLNEA---FD-----SVEN-----<br>-----VILIFS-----VNRTRHFQ-----GCAKM--TSRIGGSVAG-<br>GNWK-YA-----HGTAH-----Y-GRNFSVKWLKLCELSFHK-TRHLRNPYNENL-PVKISRDCQELE-----PSIGEQLASLL            |
|                    | Phvul.006G121600 | PvYTH<br>DF1C | AK-----FFVIKSYSEDD--VHK--SIKYNVWSSTPHGNKKLENA---YE-----DAKKI-AAE-----<br>-----KSGVCP----IFLFFS-----VNASGQFC-----GVAEM---<br>IGTVDFNKNM-DFWQ-QD-----KW-SGSFPVKWHFIKDVPNPN-FRHIILENNENK-PVTNSRDTQEIV-----YLKGLEMLKIF     |
|                    | Phvul.003G119300 | PvYTH<br>DF2C | AK-----YFVIKSYSEDD--VHK--SIKYNVWSSTPHGNKKLQNA---YE-----DAERI-AAG-----<br>-----KSGGCP----VFLFFS-----VNASGQFC-----GVAEM---<br>AGPVDFNKDM-DFWQ-QD-----KW-SGSFPVKWHIIKDVPNAN-FRHIILENNENK-PVTNSRDTQEIM-----<br>YGKGLEMLKMF |
|                    | Phvul.004G132700 | PvYTH<br>DF3C | AL-----FFVIKSYNEED--IHK--SIKYNVWASTPNGNKRLDGA---YQ-----DAQKR-MED-----<br>-----KGCKCP----VFLFFS-----<br>-----VKWHIIKDVPNPQ-LRHIILENNNDHK-PVTN----MN-----FPQGVEILNIF                                                     |
|                    | Phvul.005G045600 | PvYTH<br>DF4C | AL-----FFVIKSYSEDD--IHK--SIKYNVWASTPNGNKRLDGA---FQ-----DAQKR-MEE-----<br>-----KGCKCP----VFLFFS-----VNASGQFC-----GVAEM---<br>TGRVDFNKSMM-DFWQ-QD-----KW-NGYFPVKWHIIKDVPNPQ-LRHIILENNNDHK-PVTNSRDTQEVN-----FPQGVEILNIF   |
|                    | Phvul.010G165400 | PvYTH<br>DF1B | AK-----FFVIKSYSEDN--VHK--SIKYGVWASTPNGNRKLDAA---YR-----QAMEK-----<br>-----QEACP----IFLFFS-----VNASAQFC-----GVAEM---<br>VGPVNFDKSV-DFWQ-QD-----KW-SGQFPVKWHIIKDVPNSQ-FRHIVLENNDNK-PVTNSRDTQEVK-----<br>LPQGIEMLTIF      |
|                    | Phvul.006G218800 | PvYTH<br>DF5C | AK-----FYVIKSFNEDD--VHK--GVKYNVWTSTPNGNKKLNIA---FL-----DAEAK-LRQ-----<br>-----TGTKCP----VFLFFS-----VNASRQFV-----GVAEM---<br>VGPVDFKKDM-SFWK-LD-----KY-NGFFSIKWHIIKDVPNNQ-FVHIILPSNENK-PVTFTTRDTQEIG-----LKQGLEMLNIF    |
|                    | Phvul.002G247000 | PvYTH<br>DF1A | AK-----FFVIKSYSEDD--IHK--SIKYNVWASTQNGNKKLDAA---YQ-----EAQQK-P-----<br>-----GGCP----VFLFFS-----VNTSGQFV-----GLAEM---<br>VGSVDFNKSV-EYWQ-QD-----KW-NGCFPLKWHIVKDVPNNL-LRHITLDNNENK-PVTNSRDTQEVN-----<br>LEPGLKLIKIF     |
|                    | Phvul.004G080300 | PvYTH<br>DF2A | AK-----FFVIKSYSEDD--IHK--SIKYNVWASTLNGNKKLDAA---YH-----EAKEK-P-----<br>-----GDGP----VFLFFS-----VNTSGQFV-----GLAEM---VSPVDFGRTL-<br>EYWQ-QD-----RW-TGCFSVKWHIIKDIPNSV-LRHITLENNENK-PVTNSRDTQEVN-----FEKGIQVLKIF         |
|                    | Phvul.001G110200 | PvYTH<br>DF3A | AK-----FFVIKSYSEDD--IHK--SIKYSVWASTPNGNKKLDAA---YQ-----EAKEK-T-----<br>-----GGCP----IFLLFS-----VNTSGQFV-----GLAEM---LGPVDFGKSV-<br>DYWQ-QD-----RW-TGCFSVKWHVIKDIPNSV-MRHITLENNENK-PVTNSRDTQEVK-----FEKGVQIVKIF         |
|                    |                  |               |                                                                                                                                                                                                                        |
|                    |                  |               |                                                                                                                                                                                                                        |

|                          |                      |                |                                                                                                                                                                                                                        |
|--------------------------|----------------------|----------------|------------------------------------------------------------------------------------------------------------------------------------------------------------------------------------------------------------------------|
|                          |                      |                |                                                                                                                                                                                                                        |
| <i>Solanum tuberosum</i> | XP_006352991         | StYTH<br>DC1Ba | IR-----YFVIKSLNHEN--IQL--SVNRGIWATQAMNEAILDEA---FH-----NSSK-----<br>-----VILIFS-----VNMSGYFQ-----GYAQM--ISSVGLRRD--QVWS-<br>QG-----NGGRN-----PW-GRSFEVNWLRLYDLPFQR-TLHLKNPWNQYK-PVKISRDCQELP-----PDIGEALCELL           |
|                          | XP_006358382         | StYTH<br>DC1Bb | IR-----YFVIKSLNHEN--IQL--SVNRGIWATQAMNEAILDEA---FH-----NSSK-----<br>-----VILIFS-----VNMSGYFQ-----GYAQM--ISSVGLRRD--QVWS-<br>QG-----NGGRN-----PW-GRSFEVNWLRLYDLPFQR-TLHLQNPWNQYK-PVKISRDCQELP-----PDIGEALCELL           |
|                          | XP_006343481         | StYTH<br>DC1Aa | SR-----YFIVKSCNREN--LEL--SVQQGVWATQRSNEAKLNEA---FD-----SVEN-----<br>-----VILIFS-----VNRTRHFQ-----GCGKM--TSRIGGAANG-<br>GNWK-HE-----HGTAH-----Y-GRNFSVKWLKLCELSFQK-THHLRNPYNENL-PVKISRDCQELE-----PSVGEQLASLL            |
|                          | XP_006359103         | StYTH<br>DC1Ab | SR-----YFIVKSCNREN--LEL--SVQQGVWATQRSNEAKLNEA---FD-----SVEN-----<br>-----VILVFS-----INRTRHFQ-----GLAKM--TSRIGGAAKG-<br>GNWK-HE-----HGTAH-----Y-GRNFSLKWLKLCELSFQK-TRHLRNPYNENL-PVKISRDCQELE-----ISVGEQLASLL            |
|                          | PGSC0003DMG400004607 | StYTH<br>DF1C  | AK-----FFVIKSYSEDD--VHK--SIKYNVWSSTPNGNKKLNSA---YE-----DAQRI-TAG-----<br>-----NPRGCP----IFLFFS-----VNASGQFC-----GVAEM---<br>TGPVDFYNDM-DFWQ-QD-----KW-SGSFPVKWHFIKDVPNPN-FRHIILENNENK-PVTNSRDTQEIR-----<br>YKKGIEMLKVF |
|                          | XP_006338126         | StYTH<br>DF1B  | AK-----FFVIKSFSEDN--VHK--SIKYSVWASTPQGNRKLDAA---YA-----EAKEM-----<br>-----NANCP----VFLFFS-----VNASGQFC-----GVAEM---<br>VGPIDFENNA-EYWQ-QD-----RW-SGKFPVKWHVIKDVPNSQ-FRHILLEHNDNK-PVTHSRDSQQVK-----<br>LPEGLEMLKIF      |
|                          | PGSC0003DMG400024891 | StYTH<br>DF2C  | AK-----FYIIKSYSEDD--IHK--CVKYDVWSSTPNGNKKLDTA---FV-----EAEAK-SSG-----<br>-----TGSSCP----VFLFFS-----VNGSGQFL-----GVAEM---<br>VGQVDFNRNM-DFWQ-LD-----KW-SGFFPLKWHIVKDVPNTQ-FRHIILENNDNR-PVTYSRDTQEIG-----<br>LKEGLEMLNIL |
|                          | PGSC0003DMG400024008 | StYTH<br>DF1A  | AK-----FFIIKSYSEDD--VHK--SIKYNVWASTPNGNKKLDA---YQ-----EAQQN-S-----<br>-----GGCP----VFLFFS-----VNTSGQFV-----GVAEM---<br>VGPVDFNKNV-EYWQ-QD-----KW-VGCFPVKWHIVKDVPNSL-LKHITLENNENK-PVTNSRDTQEVK-----<br>VEQGLQVLKIF      |
| <i>Brassica rapa</i>     | Brara.B02704         | BrYTH<br>DC1Ba | TR-----YFIIKSLNYDN--IQL--SVERGIWATQVMNEPILEGA---FH-----NSGR-----<br>-----VVLIFS-----VNMSGFFQ-----GYAEM--LSPVGWRRD--<br>HIWS-QG-----GGKNN-----PW-GRSFKVKWLRLSELPFQK-TLHLKNSLNDYK-PVKISRDCQELP-----GDIGEALCELL           |
|                          | RID51204             | BrYTH<br>DC1Bb | TR-----YFIIKSLNYDN--IQL--SVERGIWATQVMNEPILEGA---FH-----NSGR-----<br>-----VVLIFS-----VNMSGFFQ-----GYAEM--LSPVGWRRD--<br>HIWS-QG-----GGKNN-----PW-GRSFKVKWLRLSELPFQK-TLHLKNPLNDYK-PVKISRDCQELP-----GDIGEALCELL           |
|                          | Brara.H01885         | BrYTH<br>DC1Aa | NR-----YFVVKSNNSEN--FEL--SVQQGVWATQRSNEAKLNEA---FD-----TVNN-----<br>-----VILIFS-----VNRTRHFQ-----GCAKM--TSRIGGYIGG-<br>GNWK-NE-----HGTQQ-----Y-GGNFSVKWLKLCELSFHK-TRNLRNPYNENL-PVKISRDCQELE-----PSVGEELASLL            |

|              |                |                                                                                                                                                                                                                        |
|--------------|----------------|------------------------------------------------------------------------------------------------------------------------------------------------------------------------------------------------------------------------|
| Brara.G00734 | BrYTH<br>DC1Ab | NR-----YFVVKSCNLEN--FEL--SVQRGVWATQRSNEAKLNEA---FD-----SVAN-----<br>-----VILIFS-----VNRTRHFQ-----GCAKM--TSRIG---G-<br>ENWK-HE-----HGTAQ-----F-GRNFSVKWLKLCELSFHK-TRNLRNPYNENL-PVK                                      |
| Brara.F00450 | BrYTH<br>DF1C  | AK-----FFVIKSYSEDD--VHK--SIKYSVWSSTLHGNKKLQSA---YE-----DAQRI-ATE-----<br>-----KSCECP----IFLFFS-----VNASGLFC-----GMAEM---<br>TGPVSFEKDM-DFWQ-QD-----KW-SGSFPVKWHIIKDVPNSY-FRHIILHNNENK-PVTNSRDTQEIM-----MKQGLEVLKIF     |
| Brara.G03650 | BrYTH<br>DF2C  | AM-----FFVIKSYSEDD--IHK--SIKYSVWSSTLNGNKKLDNA---FQ-----ESQKK-VAE-----<br>-----KGGTCP----VFLFFS-----VNASGQFC-----GVAEM---<br>TGRVDYETSM-DFWQ-QD-----KW-TGYFPVKWHIIKDVPNPQ-LRHVILENNENK-PVTNSRDTQEVN-----<br>LPQGNEVLNIF |
| XP_009124755 | BrYTH<br>DF3C  | AM-----FFVIKSYSEDD--IHK--SIKYNVWSSTLNGNKKLDSA---YQ-----ESQKK-VAE-----<br>-----NGGTCP----VFLFFS-----VNASGQFC-----GVAEM---<br>TGRVDYEKSM-EFWQ-QD-----KW-TGYFPVKWHIIKDVPNPQ-LRHVILENNENK-PVTNSRDTQEVN-----<br>LPQGNEVLNIF |
| Brara.B02362 | BrYTH<br>DF4C  | AM-----FFVIKSYSEDD--IHK--SIKYNVWSSTLNGNKKLDSA---YQ-----ESQKK-VAE-----<br>-----KGGTCP----VFLFFS-----VNASGQFC-----GVAEM---<br>TGRVDYEKSM-EFWQ-QD-----KW-TGYFPVKWHIIKDVPNPQ-LRHVILENNENK-PVTNSRDTQEVN-----<br>LPQGNEVLDIF |
| Brara.G02088 | BrYTH<br>DF5C  | AM-----FFVIKSYSEDD--IHK--SIKYNVWSSTLNGNKKLDSA---YQ-----ESQKK-VAE-----<br>-----KGGTCP----VFLFFS-----VNASGQFC-----GVAEM---<br>TGRVDYEKSM-EFWQ-QD-----KW-TGYFPVKWHIIKDVPNPQ-LRHVILENNENK-PVTNSRDTQEVN-----<br>LPQGNEVLNIF |
| Brara.E02805 | BrYTH<br>DF1B  | AK-----LFIKSYSEDN--VHK--SIKYNVWASTANGNKKLDAA---YR-----EAKEE-----<br>-----KEPCP----VLLFS-----VNASSQFC-----GVAEM--IGPVDFEKS-<br>DYWQ-QD-----KW-SGQFPVKWHIIKDVPNSQ-FRHIILENNDNK-PVTNSRDTQEVK-----LEQGIEMLKIF              |
| Brara.A03292 | BrYTH<br>DF2B  | AK-----LFIKSYSEDN--VHK--SIKYNVWASTPNGNKKLDAA---YR-----EAKEE-----<br>-----KEACP----VLLFS-----VNASSQFC-----GVAEM--IGPVDFEKS-<br>DYWQ-QD-----KW-NGQFPVKWHIIKDVPNSQ-FRHIILENNDNK-PVTNSRDTQEVK-----LEQGIEMLKIF              |
| Brara.H02025 | BrYTH<br>DF3B  | AK-----FFVIKSYSEDN--VYK--SMKYCVWASTKNGNKKLDAA---YR-----EAKTK-----<br>-----EVACP----VLLFS-----VNASAQFC-----GVAEM---<br>VGPVDFETSV-EYWQ-QD-----RW-SGHFPVKWVIVKDVPNSL-FRHIIEDNDNK-PVTNSRDTQEVG-----VEQGIEMINIF            |
| Brara.B01161 | BrYTH<br>DF4B  | AK-----FFIVKSFSEDN--VHR--SIKYNVWASTPHGNKKLDTA---YR-----DAEKM-----<br>-----GGKCP----IFLFFS-----VNASGQFC-----GVSEM---<br>VGPVDFEKDA-GYWQ-QD-----RW-SGQFPVKWHILKDVPNNR-FSHILLQNNDNK-PVTHSRDSQEVK-----<br>LRQGIEMLRIF      |
| Brara.C01152 | BrYTH<br>DF5B  | AR-----FFIVKSFSEDN--VHR--SIKYNVWASTPHGNKKLDTA---YR-----DAEKM-----<br>-----GGKCP----IFLFFS-----VNASGQFC-----GVAEM---                                                                                                    |

|                     |                  |                                                                                                                                                                                                                        |                                                                                                                                                                                                                |
|---------------------|------------------|------------------------------------------------------------------------------------------------------------------------------------------------------------------------------------------------------------------------|----------------------------------------------------------------------------------------------------------------------------------------------------------------------------------------------------------------|
|                     |                  |                                                                                                                                                                                                                        | VGPVDFEKDA-AYWQ-QG-----KW-NGQFPVKWHIVKDVPNNR-FSHILLQNNSDK-PVTHSRDSQEVK-----<br>LRQGIEMLRIF                                                                                                                     |
| Brara.F00638        | BrYTH<br>DF6C    | AT-----FFVIKSYSEDD--VHK--SIKYSVWSSTVNGNKKLDAA---YR-----DAEAK-TLV-----<br>-----DGKKRP----IFLFFS-----VNASRQFV-----GLAEM---<br>VGYVDMNKDL-DFWQ-VD-----KW-CGFFPVEWHVVKDVPNWE-LCHIVLHNNEGK-AVTHTRDTQEIK-----<br>LKEGLQMLSIF |                                                                                                                                                                                                                |
| Brara.C03469        | BrYTH<br>DF1A    | AM-----FFVIKSYSEDD--VHK--SIKYNVWASTPNGNKKLAAA---YQ-----EAQQK-P-----<br>-----GGCP----IFLFFS-----VNASGQFV-----GLAEM---<br>TGPVDFDTNV-DCWQ-QD-----KW-TGSFPLKWHIVKDVPNSL-LKHITLENNENK-PVTNSRDTQEVK-----<br>LEQGLKIVKIF     |                                                                                                                                                                                                                |
| Brara.A03258        | BrYTH<br>DF2A    | AM-----FFVIKSYSEDD--VHK--SIKYNVWASTPNGNKKLAAA---YQ-----EAQQK-P-----<br>-----GGCP----IFLFFS-----VNASGQFV-----GLAEM---<br>TGPVDFDTNV-EYWQ-QD-----KW-TGSFPLKWHIVKDVPNSL-LKHITLENNENK-PVTNSRDTQEVK-----<br>LEQGLKIVKIF     |                                                                                                                                                                                                                |
| Brara.E02771        | BrYTH<br>DF3A    | AM-----FFVIKSYSEDD--VHK--SIKYNVWASTPNGNKKLAAA---YQ-----EAQQK-P-----<br>-----GGCP----IFLFFS-----VNASGQFV-----GLAEM---<br>TGPVDFNTNV-EYWQ-QD-----KW-TGSFPLKWHIVKDVPNSL-LKHITLENNENK-PVTNSRDTQEVK-----<br>LEQGLKIVKIF     |                                                                                                                                                                                                                |
| Brara.B02570        | BrYTH<br>DF4A    | AK-----LFVIKSYSEDD--IHK--SIKYNVWSSTPNGNKKLDAA---YN-----EAKEK-SN-----<br>-----GSCP----VFLMFS-----VNTSGQFV-----GLAEM---<br>VGPVDFNQTV-EYWQ-QD-----KW-IGCFPVKWHIVKDIPNSS-LRHITLENNENK-PVTNSRDTQEVT-----LEQCMKVIKIF        |                                                                                                                                                                                                                |
| Brara.G02587        | BrYTH<br>DF5A    | AK-----LFVIKSYSEDD--VHK--SIKYNVWSSTPNGNKKLNAA---YN-----EAKDK-----<br>-----SCP----VFLIFS-----VNTSGQFV-----GLAEM---VGPVDFNQTV-<br>EYWQ-QD-----KW-VGCFPVKWHIVKDIPNSS-LRHITLENNENK-PVTNSRDTQEVK-----IEQGVKVIKIF            |                                                                                                                                                                                                                |
| Brara.A03796        | BrYTH<br>DF6A    | AK-----FFVIKSYSEDD--VHN--SIKYGMWSSTPTGNKKLNAA---Y-----QES-S-----<br>-----QDCP----VYLLFS-----VNASGQFV-----GVAEM---TGPVDFNKTM-<br>EYWQ-QD-----KW-IGCFPVKWRIIKDVPNSL-LRHITLVNNENK-PVTNSRDTQEVK-----LEDGIKIIKIF            |                                                                                                                                                                                                                |
| Brara.E03479        | BrYTH<br>DF7A    | EK-----FFVIKSYSEDD--VHN--SIKHGVWSSTPTGNKKLNAA---YY-----EAQES-C-----<br>-----CP----VYLLFS-----VNASGQFV-----GVAEM---TGPVDFNKTV-<br>EYWQ-QD-----KW-IGCFPVKWHIIKDVPNSF-LRHVTIANNENK-PVTNSRDTREVS-----VEDGTKIIKIF           |                                                                                                                                                                                                                |
| Boechera<br>stricta | Bostr.25463s0115 | BsYTH<br>DC1B                                                                                                                                                                                                          | TR-----YFIIKSLNYEN--IQV--SVEKGIWATQVMNEPILEGA---FH-----KSGR-----<br>-----VILIFS-----VNMSGFFQ-----GYAEM---LSPVGWRRD--HIWS-<br>QG-----GGKNN-----PW-GRSFRVKWLRRLSELPFQK-TLHLKNPLNDYK-PVKISRDCQELP-----EDIGEALCELL |
|                     | Bostr.15697s0342 | BsYTH<br>DC1A                                                                                                                                                                                                          | NR-----YFVVKSCNREN--FEL--SVQQGVWATQRSNEAKLNEA---FD-----SVEN-----<br>-----VILIFS-----VNRTRHFQ-----GCAKM---TSRIGGYIGG-<br>GNWK-HE-----HGTAQ-----Y-GRNFSVKWLKLCELSFHK-TRNLRNPYNENL-PVKISRDCQELE-----PSIGEQLASLL   |
|                     | Bostr.19424s0931 | BsYTH<br>DF1C                                                                                                                                                                                                          | AK-----FFVIK--SEDD--VHK--SIKYGVWSSTLHGNKKLQSV---YE-----DAQRI-ATE-----<br>-----KSCKCP----IFLFFS-----VNASGLIC-----GVAEM---                                                                                       |

|                                     |               |                                                                                                                                                                                                                        |                                                                                                                                                                                                               |
|-------------------------------------|---------------|------------------------------------------------------------------------------------------------------------------------------------------------------------------------------------------------------------------------|---------------------------------------------------------------------------------------------------------------------------------------------------------------------------------------------------------------|
|                                     |               |                                                                                                                                                                                                                        | TGPVYLDRDM-DFWQ-QD-----KW-SGSFPVKWYIIKDVPNSY-FRHIILHNNENK-PVTNSRDTQEIM-----<br>LKQGLEVLKLF                                                                                                                    |
| Bostr.15654s0023                    | BsYTH<br>DF2C | AK-----FFVIKSYSEDD--VHK--SIKYNVWSSTLHGNNKKLQSA---YE-----DAQKI-ATK-----<br>-----KSCECP----IFLFFS-----VNASGLFC-----GMAEM---<br>TGPVSFDKDM-DFWQ-QD-----KW-SGSFPVKWHIIKDVPNSY-FRHIILQNNENK-PVTNSRDTQEIM-----LKQGLEVLKIF    |                                                                                                                                                                                                               |
| Bostr.20129s0365                    | BsYTH<br>DF3C | AI-----FFVIKSYSEDD--IHK--SIKYNVWSSTLNGNKKLDSA---YQ-----ESQKK-IAE-----<br>-----KSVKCP----VFLFFS-----VNASGQFC-----GVAEM---<br>VGRVDYKKSM-EFWQ-QD-----KW-TGYFPVKWHIIKDVPNPQ-LRHIILENNENK-PVTNSRDTQEVN-----<br>LPQGNEVLNIF |                                                                                                                                                                                                               |
| Bostr.3640s0080                     | BsYTH<br>DF1B | AR-----LFIKSYSEDN--VHK--SIKYNVWASTPNGNKKLDAA---YR-----EAKDE-----<br>-----KEPCP----LFLFFS-----VNASSQFC-----GVAEM---VGPVDFEKS-<br>DYWQ-QD-----KW-SGQFPVKWHIIKDVPNSQ-FRHIILENNDNK-PVTNSRDTQEVK-----LEQGIEMLKIF            |                                                                                                                                                                                                               |
| Bostr.15697s0116                    | BsYTH<br>DF2B | TK-----FFVIKSYSEDN--VHK--SIKYCVWASTKNGNKKLDAA---YR-----EAKTK-----<br>-----DVACP----VFLFFS-----VNASAQFC-----GVAEM---<br>VGPVDFNTSV-EYWQ-QD-----RW-SGHFPVRWLIVKDVPNSL-FRHIIENNDNK-PVTNSRDTQEVG-----LEQGIEMLNIF           |                                                                                                                                                                                                               |
| Bostr.26833s0433                    | BsYTH<br>DF3B | AK-----FFIVKSFSEDN--VHR--SIKYNVWASTPHGNKKLDTA---YR-----DAEKM-----<br>-----GGKCP----IFLFFS-----VNASGQFC-----GVSEM---<br>VGPVDFDKDA-GYWQ-QD-----RW-SGQFPVKWHIVKDVPNNR-FCHILLQNNNDNK-PVTHSRDSQEVK-----<br>LRQGIEMLRIF     |                                                                                                                                                                                                               |
| Bostr.25494s0041                    | BsYTH<br>DF4C | AK-----FFVIKSYSEDD--VHK--SIKYSVWSSTPNGNKKLDAA---FR-----DAETK-TLE-----<br>-----DGKKRP----IFLFFS-----VNASRQFV-----GLAEM---<br>VGYVDFKKDL-DFWQ-QD-----KW-SGFFPVEWHVVKDIPNWE-LRHIILDNNEDK-PVTHTRDTHEIK-----<br>LKEGLQMLSIF |                                                                                                                                                                                                               |
| Bostr.3640s0139                     | BsYTH<br>DF1A | AM-----FFIIKSYSEDD--VHK--SIKYNVWASTPNGNKKLAAA---YQ-----EAQKQ-P-----<br>-----GGCP----IFLFFS-----VNASGQFV-----GLAEM---<br>TGPVDFNTNV-EYWQ-QD-----KW-TGSFPLKWHIVKDVPNSL-LKHITLENNENK-PVTNSRDTQEVK-----<br>LEQGLKIVKIF     |                                                                                                                                                                                                               |
| Bostr.26833s0133                    | BsYTH<br>DF2A | AK-----FFVIKSYSEDD--IHK--SIKYNVWSSTPNGNKKLDAS---FN-----EAKQK-S-----<br>-----DSCP----VFLFFS-----VNTSGQFV-----GLAEM---VGPVDFNKT-<br>EYWQ-QD-----KW-IGCFPVKWHFVKDIPNSS-LRHITLENNENK-PVTNSRDTQEVK-----LEQGIKVVKIF          |                                                                                                                                                                                                               |
| Bostr.2570s0314                     | BsYTH<br>DF3A | AK-----FFVIKSYSEDD--VHN--SIKYGVWSSTPTGNKKLNAA---YY-----EAKEN-S-----<br>-----QECP----VYLLFS-----VNASGQFV-----GLAEM---<br>VGPVDFNKT- EYWQ-QD-----KW-IGCFPVKWHIIKDIPNSL-LRHITLANNENK-PVTNSRDTQEVN-----LEHGTKIIF           |                                                                                                                                                                                                               |
| <i>Linum<br/>usitatissimu<br/>m</i> | Lus10006706.g | LuYTH<br>DC1Ba                                                                                                                                                                                                         | TR-----YFIIKSLNHHN--LQL--SVDEGIWATQVMNEPILEEA---FN-----NSGK-----<br>-----VILIFS-----VNMSGFFQ-----GYAQM---VSSIGLRHD--HIWS-<br>QG-----SGKSG-----SW-GRSFKVKWLQLNDLPFQR-TLHLKNPLNEYK-PVKISRDCQELP-----EDIGETLCRLI |

|               |                |                                                                                                                                                                                                                         |
|---------------|----------------|-------------------------------------------------------------------------------------------------------------------------------------------------------------------------------------------------------------------------|
| Lus10007048.g | LuYTH<br>DC1Bb | TR-----YFIIKSLNHHN--LQL--SVDEGIWATQVMNEPILEEA--FN-----NSGK-----<br>-----VILIFS-----VNMSGFFQ-----GYAQM--VSSIGLRHD--HIWS-<br>QG-----SGKVG-----SW-GRSFKVKWLQLNDLPFQR-TLHLKNPLNEYK-PVKISRDCQELP-----EDIGEALCRLI             |
| Lus10023254.g | LuYTH<br>DC1A  | SR-----YFIVKSCNREN--LEL--SVQQGVWATQRSNEAKLNEA--FD-----SAEN-----<br>-----VILVFS-----VNRTRHFQ-----GCAKM--TSKIGATIGG-<br>GNWK-YQ-----HGTAH-----Y-GRNFSVKWLKLCELSFHK-TRHLRNPYNENL-PVKISRDCQELE-----PSVGEQLASLL              |
| Lus10017111.g | LuYTH<br>DF1C  | AK-----FFVIKSYSEDD--VHK--SIKYNVWSSTLHGNNKKLQSA---YE-----DAQKI-AAE-----<br>-----KVTSCP----VFLFFS-----VNASGQFC-----GVAEM---<br>IGPVDLKKDM-DFWQ-QD-----KW-SGSFPVKWHMIKDVQNTS-FRHIILENNEHK-PVTNSRDTQEVL-----<br>LKQGLQMLKIF |
| Lus10018343.g | LuYTH<br>DF2C  | AK-----FFVIKSYSEDD--VHK--SIKYNVWSSTLHGNNKKLQSA---YE-----DAQKI-AAE-----<br>-----KATSCP----VFLFFS-----VNASGQFC-----GVAEM---<br>IGPVDLKKDM-DFWQ-QD-----KW-SGSFPVKWHMIKDVQNTS-FRHIILENNEHK-PVTNSRDTQEVL-----<br>LKQGLQMLKIF |
| Lus10034792.g | LuYTH<br>DF1B  | AK-----FFIIKSYSEDN--VHK--SIKYGIWASTPNGNKKLDAA---YA-----DAKTK-----<br>-----EDPCP----VFLIFS-----VNASAQFC-----GVAEM--TGPVNFEKSV-<br>DYWQ-QD-----KW-SGQFPVKWHMIKDV PNSQ-FRHIVLENNDNK-PVTNSRDTQEVK-----LEQGIEMLSIF           |
| Lus10033335.g | LuYTH<br>DF2B  | AK-----FFIIKSYSEDN--VHK--SIKYGIWASTPNGNKKLDAA---YA-----DAKTK-----<br>-----EDPCP----VFLIFS-----VNASAQFC-----GVAEM--TGPVNFEKSV-<br>DYWQ-QD-----KW-SGQFPVKWHMIKDV PNSQ-FRHIVLENNDNK-PVTNSRDTQEVK-----LEQGLEMLSIF           |
| Lus10037028.g | LuYTH<br>DF3B  | AK-----FFVIKSYSEDN--VHK--SIKYGVWASTQNGNKKLDAA---YS-----EAQEK-----<br>-----QRAPP----VFLIFS-----VNASAQFC-----GVAEM---<br>VGPVDFEKS SV-NYWQ-QD-----KW-TGQFPVKWHIIKDV PNSQ-FRHIILENNDNK-PVTNSRDTQEVQ-----<br>LDHGIEMLNIF    |
| Lus10015778.g | LuYTH<br>DF4B  | AK-----FFVIKSYSEDN--VHK--SIKYGVWASTQNGNKKLDAA---YS-----EAQET-----<br>-----QRAPP----VFLIFS-----VNASAQFC-----GVAEM---<br>VGHVDFEKS SV-NYWQ-QD-----KW-TGQFPVKWHIIKDV PNSQ-FRHIILGNNDNK-PVTNSRDTQEVQ-----<br>LDHGIEMLNIF    |
| Lus10027582.g | LuYTH<br>DF5B  | AK-----FFIIKSFSEDN--VHK--SVKYGVWASTPHGNKKLDAA---YN-----QAKEI-----<br>-----DPKCP----IFLIFS-----VNASGQFC-----GVAEM--LGPVDFGKDA-<br>DYWQ-QD-----RW-SGQFPVRWHIVKDVPNPR-FRHILLENNENK-PVTHSRDCQEVK-----LKHGIEILKIF            |
| Lus10037365.g | LuYTH<br>DF3C  | AK-----FYVIKSYNEDD--IHK--SIKYNVWASTPNGNRKLDEA---YR-----SAQEK-LSE-----<br>-----SGVNSP----IFLFFS-----VNGSGQFV-----GIAEM---<br>VGQVDFNKDM-DFWQ-LN-----KW-NGFFPVKWHVVKDIPNNQ-LRHIILENENK-PVTFSRDTQEIG-----<br>MKQGLEMLSIF   |
| Lus10035790.g | LuYTH<br>DF4C  | AK-----FYVIKSYNEDD--IHK--SIKYNVWASTPNGNRKLDES---YR-----SAQEK-LSE-----<br>-----TGVKSP----IFLFFS-----VNGSGQFV-----GIAEM---                                                                                                |



|                           |                    |               |                                                                                                                                                                                                                        |
|---------------------------|--------------------|---------------|------------------------------------------------------------------------------------------------------------------------------------------------------------------------------------------------------------------------|
|                           |                    |               | VGQVDFNKDM-DFWQ-LN-----KW-NGFFPVKWHIVKDIPNNQ-LRHIILENNENK-PVTFSRDTQEIG-----<br>MKQGLEMLSIF                                                                                                                             |
|                           | Lus10037364.g      | LuYTH<br>DF5C | AK-----FYVIKSYSEDD--IHK--SIKYNVWSSTPNGNKKLDAA---FR-----DSEEK-SSE-----<br>-----SGTKCP----VFLFFS-----VNGSGQFV-----GLAEM---<br>TGLVDFNKDM-DFWQ-VD-----KW-SGFFPLKWHIVEDIPNTQ-LRHIVLENNDNR-PVTFSRDTQEIG-----LKQGLEMLTIF     |
|                           | Lus10002624.g      | LuYTH<br>DF1A | AK-----FFVIKSYSEDD--VHK--SIKYGVWTSTPNGNKKLDAA---YR-----EASAK-A-----<br>-----ARCP----VLLFS-----VNTSGQFV-----GLAEM---<br>TGPVDFDKTV-EYWQ-QD-----KW-TGCFAVKWHIIKDVPNST-LRHITLENNENK-PVTNSRDTQEIH-----IEKGIEVLKIF          |
|                           | Lus10020269.g      | LuYTH<br>DF2A | AK-----FFVIKSYSEDD--VHK--SIKYGVWTSTSNGNKKLDAA---YR-----ESSAK-A-----<br>-----AQCP----VLLFS-----VNTSGQFV-----GLAEM---<br>VGPVDFDKTV-EYWQ-QD-----KW-TGCFAVKWHIIKDVPNST-LRHITLENNENK-PVTNSRDTQEVH-----IEKGIEVLKIF          |
| <i>Salix<br/>purpurea</i> | SapurV1A.0260s0290 | SpYTH<br>DC1B | TR-----YFIIKSLNHHN--IQL--SIENGIWATQVRNEPILEEA---FR-----NSGR-----<br>-----VILIYS-----VNMSGFFQ-----GYAQM--LSSVGWRHD--NLWS-<br>EG-----SGKSN-----PW-GRSFKVKWLQLNDLPFQK-TLHLKNPLNDYK-PVKISRDCQELP-----EDIGEALCELI           |
|                           | SapurV1A.0030s0120 | SpYTH<br>DC1A | SR-----YFIVKSCNREN--LEL--SVQQGVWATQRSNEIKLNEA---LD-----SSDN-----<br>-----VILIFS-----VNRTRHFQ-----GCAKM--TSKIGASVGG-<br>GNWK-YA-----HGTAH-----Y-GRNFSVKWLKLCELSFHK-TRHLRNPFNENL-PVKISRDCQELE-----PSIGEQLASLL            |
|                           | SapurV1A.0114s0500 | SpYTH<br>DF1C | AK-----FFVIKSYSEDD--VHK--SIKYNVWSSTPHGNKKLHSA---YE-----DARKL-DLG-----<br>-----RPRGCP----IFLFFS-----VNASGQFC-----GVAEM---<br>VGPVDFNRDM-DFWQ-QD-----KW-SGSFFVKWHIIKDIPNSS-FRHIILENNENK-PVTNSRDTQEIM-----<br>YRQGLEMLKMF |
|                           | SapurV1A.0072s0540 | SpYTH<br>DF2C | AK-----FFVIKSYSEDD--VHK--SIKYNVWSSTPHGNKKLQTA---FE-----DAQKL-AAG-----<br>-----RPRGCP----IFLFFS-----VNASGQFC-----GVAEM---<br>IGPVDLHRDM-DFWQ-QD-----KW-SGSFLVKWHIIKDIPNSS-FRHIILVNNEsk-PVTNSRDTQEIM-----YKQGLEMLKIF     |
|                           | SapurV1A.0149s0560 | SpYTH<br>DF3C | AF-----FFVIKSYSEDD--VHK--SIKYNVWASTPNGNKRLDSA---YQ-----DAQQK-IAE-----<br>-----KGNSCP----VFLFFS-----VNASGQFC-----GVAEM---<br>IGRVDFNKTM-DFWQ-QD-----KW-NGCFPVKWHIIKDVPNPQ-LRHIILENNENK-PVTNSRDTQEVK-----LPQGIDILNIF     |
|                           | SapurV1A.0164s0020 | SpYTH<br>DF4C | AF-----FFVIKSYSEDD--VHK--SIKYNVWASTPNGNKRLDIA---YQ-----DAQQK-IAE-----<br>-----KGNSCP----VFLFFS-----VNASGQFC-----GVAEM---<br>IGRVDFNKTM-DFWQ-QD-----KW-NGCFPVKWHIIKDVPNPQ-LRHIILENNENK-PVTNSRDTQEVK-----LPQGIDILNIF     |
|                           | SapurV1A.0093s0340 | SpYTH<br>DF5C | AF-----FFVIKSYSEDD--IHK--SIKYNVWASTPNGNKRLDNA---YI-----DSQLK-IAE-----<br>-----KGCSCP----VFLFFS-----VNASGQFC-----GVAEM---<br>IGRVDFNKRM-DFWQ-QD-----KW-NGCFPVKWHIIKDVPNLH-LRHIILENNENK-PVTNSRDTQEVK-----FPQGIEILNIF     |
|                           | SapurV1A.2058s0020 | SpYTH<br>DF1B | AK-----FFIIKSYSEDN--VHK--SIKYGVWASTPNGNRKLDTA---YS-----EAKDK-----<br>-----QDPCP----VLLFS-----VNASAQFC-----GVAEM---<br>VGPVDFDKSV-DYWQ-QD-----KW-SGQFPVKWHIIKDVPNSR-FRHIVLENNDNK-PVTNSRDTQEVK-----<br>LKHGVEMLNIF       |

|                    |               |                                                                                                                                                                                                                        |
|--------------------|---------------|------------------------------------------------------------------------------------------------------------------------------------------------------------------------------------------------------------------------|
| SapurV1A.1769s0060 | SpYTH<br>DF2B | AK-----FFIIKSYSEDN--VHK--SIKYGVWASTPNGNRKLDTA---YS-----EAKDK-----<br>-----QDPCP----VFLIFS-----VNASAQFC-----GVAEM---<br>VGPVDFDKSV-DYWQ-QD-----KW-SGQFPVKWHIIKDVPNSR-FRHIVLENNDNK-PVTNSRDTQEVK-----<br>LKHGVEMLNIF      |
| SapurV1A.1485s0090 | SpYTH<br>DF3B | AK-----FFIIKSYSEDN--VHK--SIKYGVWASTPNGNRKLDTT---YR-----EAKEK-----<br>-----QDPCP----VFLIFS-----VNASAQFC-----GVAEM---<br>TGPVDFDKSV-DYWQ-QD-----KW-NGQFPVKWHLIKDVPNSQ-FRHIVLENNDNK-PVTNSRDTQEVK-----<br>LEQGIEMLSIF      |
| SapurV1A.0703s0020 | SpYTH<br>DF4B | AK-----FFIIKSYSEDN--VHK--SIKYGVWASTPNGNRKLDTT---YR-----EAKEK-----<br>-----QDPCP----VFLIFS-----VNASAQFC-----GVAEM---<br>TGPVDFDKSV-DYWQ-QD-----KW-NGQFPVKWHLIKDVPNSQ-FRHIVLENNDNK-PVTNSRDTQEVK-----<br>LEQGIEMLSIF      |
| SapurV1A.1271s0080 | SpYTH<br>DF5B | AK-----FFVIKSYSEDN--VHK--SIKYGVWASTPNGNKKLDAA---YR-----EAKEN-----<br>-----HGTCQ----IFLIFS-----VNASAQFC-----GVAEM---<br>VGPVDFDKNV-DFWQ-QD-----KW-SGKFPVKWHIIKDVPNSQ-FRHIVLENNDNK-PVTNSRDTQEVE-----<br>LEHGVEMLGIF      |
| SapurV1A.0430s0170 | SpYTH<br>DF6B | AK-----FFIIKSFSEDN--VHK--SIKYSIWASTPHGNKKIEAA---YR-----EAKEK-----<br>-----EGNCP----VFLIFS-----VNASGQFC-----GVAEM---VGPVDFEKDA-<br>DYWQ-QD-----RW-NGQFPVQWHIIKDVPNSR-FRHMLLENNDNK-PVTHSRDSQEVK-----LEQGIEMLKIF          |
| SapurV1A.0001s2340 | SpYTH<br>DF7B | AK-----FFIIKSFSEDN--VHK--SIKYNVWASTPHGNKKIDAA---YR-----EAKEK-----<br>-----EGNCP----VFLIFS-----VNASGQFC-----GVAEM---<br>VGPVDFEKDA-EYWQ-QD-----RW-NGQFPVQWHIVKDVPNSR-FRHILLENNDNK-PATHSRDSQEVK-----<br>LEQGIEMLKIF      |
| SapurV1A.0470s0280 | SpYTH<br>DF6C | AK-----FFVIKSYNEDD--VHK--SIKYDVWASTPNGNKKLDAA---FH-----NAEUV-SSE-----<br>-----TSTKCP----IFLIFS-----VNGSGQFV-----GLAEM---<br>VGQVDFNKDM-DFWQ-ID-----KW-NGFFPVKWHVIKDIPNGQ-LRHIVLENNDGH-SVTFSRDTQEIG-----<br>LEKGLEMLNIF |
| SapurV1A.0081s0640 | SpYTH<br>DF1A | AK-----FFIIKSYSEDD--VHK--SIKYNVWASTPNGNKKLDAA---YQ-----EAEQK-S-----<br>-----GCCP----VFLIFS-----VNTSGQFV-----GLAEM---<br>TGRVDFDKSV-EYWQ-QD-----KW-TGYFPVKWHIVKDVPNSF-LKHITLDNNENK-PVTNSRDTQEVK-----<br>LEEGLKLIKIF     |
| SapurV1A.0699s0200 | SpYTH<br>DF2A | AK-----FFIIKSYSEDD--VHK--CIKYHVVWASTPNGNKKLDAA---YQ-----EAEQK-S-----<br>-----GGCP----VFLIFS-----VNTSGQFV-----GLAEM---<br>TGRVDFDKSV-EYWQ-QD-----KW-TGYFPVKWHFVKDVPNSL-LKHITLNNENK-PVTNSRDTQEVK-----<br>LEHGLKVIKIF     |
| SapurV1A.0308s0100 | SpYTH<br>DF3A | AK-----FFVIKSFSEDD--VHK--SIKYSVWTSTPNGNKKLDAA---YK-----QAKEN-Q-----<br>-----SDCP----VFLIFS-----VNTSGQFV-----GLAEM---<br>VGPVDFNKTV-EYWQ-QD-----KW-TGCFPLKWHIIKDVPNGC-LRHITLNNENK-PVTNSRDTQEVI-----FEKGVQILKIF          |

|                                 |                    |                |                                                                                                                                                                                                                        |
|---------------------------------|--------------------|----------------|------------------------------------------------------------------------------------------------------------------------------------------------------------------------------------------------------------------------|
|                                 | SapurV1A.0668s0150 | SpYTH<br>DF4A  | AK-----FFVIKSFSEDD--VHK--SIKYCVWTSTANGNKKLDAA---YK-----QAKEN-PG-----<br>-----GGCP----VFLIFS-----VNTSGQFV-----GLAEM---<br>TGHVDFNKTV-EYWQ-QD-----KW-TGCFPLKWHIIKDVPNGC-LRHITLENNENK-PVTNSRDTQEVM-----<br>FEKGVQILKIF    |
|                                 | SapurV1A.2122s0020 | SpYTH<br>DF5A  | AK-----FFVIKSFSEDD--VHK--SIKYCVWTSTANGNKKLDAA---YK-----QAKEN-PG-----<br>-----GGCP----VFLIFS-----VNTSGQFV-----GLAEM---<br>TGHVDFNKTV-EYWQ-QD-----KW-TGCFPLKWHIIKDVPNGC-LRHITLENNENK-PVTNSRDTQEVM-----<br>FEKGVQILKIF    |
| <i>Brachypodi<br/>um stacei</i> | Brast07G208500     | BstYTH<br>DC1A | TR-----YFIVKSCNREN--LEI--SVQQGIWATQRSNEAKLNEA---FE-----SMEN-----<br>-----VILIFS-----INRTRNFQ-----GCAKM---TSRIGGYIGG-<br>GNWK-SA-----NGTAH-----Y-GRNFSLQWLKLCELSFQK-THHLRNPYNDNL-PVKISRDCQELE-----PFIGEQLASLL           |
|                                 | Brast02G160500     | BstYTH<br>DF1C | AK-----YFVIKSYSEDD--VHK--SIKYNVWSSTPNGNRRLDAA---YS-----EAQGR-NPW-----<br>-----K---CP----IFLFFS-----VNTSGQFC-----GVAEM---<br>VGLVDFHKDM-DFWQ-QD-----KW-SGSFPVKWHLVKDVPNST-FRHIILENNENK-PVTNSRDTQEIP-----<br>YKSGINMLALF |
|                                 | Brast01G183400     | BstYTH<br>DF2C | AL-----FFVIKSYSEDD--IHK--SIKYNVWASTPNGNKRLDNA---YK-----VAQER-MAG-----<br>-----KGTKCP----VFLFFS-----VNASGQFC-----GVAEM---<br>VGPVDFNRNM-NFWQ-QD-----KW-NGFFPVKWHIIKDVPNPQ-FRHIILENNENK-PVTNSRDTQEVK-----<br>FLQGAEMLNIF |
|                                 | Brast08G195000     | BstYTH<br>DF3C | AK-----FFVIKSWGEAN--VHK--SVKYGVWSSSLQGNKKLDRA---FS-----DAQLI-AAS-----<br>-----SSTKCP----VFLFFS-----VNQSNHFC-----GVAEM---<br>VGPVDFQKNM-DFWS-QD-----RY-VGSFPVRWHIIKNIPNFA-LQYIVLQNNENK-PVTFSRDTQEIP-----YGPGTSMLKIF     |
|                                 | Brast01G273700     | BstYTH<br>DF4C | AK-----FFVIKSIGEAD--IHK--SIKYGVWSSSSSGNSKLDGA---YR-----DADRI-ARR-----<br>-----NSTKCP----VFLFFS-----VNGSGHFC-----GLAEM---<br>VGPVDFHKDM-DFWC-QD-----KW-SGSFPVRWHIIKDVPNYT-LQHILLQNNENK-PVTHSRDTQEIP-----YIPGISMLKIL     |
|                                 | Brast03G001600     | BstYTH<br>DF1B | AK-----FFVIKSYTEDH--VHR--SIKYNVWASTASGNRKLD SA---YR-----AAKEK-----<br>-----EDHCP----IFLFFS-----VNGSGQFC-----GVAEM---IGPVDFDRSV-<br>DYWQ-QD-----KW-SGQFPVKWHIIKDVPNNL-LRHITLENNDNK-PVTNSRDTQEVK-----LEYGLQMLTIF         |
|                                 | Brast09G011900     | BstYTH<br>DF5C | AK-----FYMIKSYSEDD--IHK--GIKYNVWASTRNGNSKLDAA---FH-----EAQNL-MKE-----<br>-----TGSKCP----VFLFFS-----VNTSGQFV-----GLAEM---<br>LGPVDFKKT M-EFWQ-QD-----KW-NGFFPVIWHIVKDIPNRL-FKHITLENNDNR-PVTFSRDTQEIH-----LPQGLELLKIF    |
|                                 | Brast04G276500     | BstYTH<br>DF6C | AK-----FYMIKSYSEDD--IHK--GIKYNVWASTPNGNSKLNAA---FH-----EAQNL-MEE-----<br>-----KGSKCP----VFLFFS-----VNTSGQFV-----GLAEM---<br>LGPVDFNKT M-DFWQ-QD-----KW-NGFFPVIWHIVKDIPNRL-FKHITLENNDNR-PVTFSRDTQEIH-----LPQGLELLKNF    |
|                                 | Brast02G048000     | BstYTH<br>DF1A | AK-----FFVIKSYSEDD--IHK--SIKYNVWASTTNGNKKLDAA---YQ-----EAQAK-S-----<br>-----SSCP----IFLFFS-----VNTSGQFV-----GVAEM---TGPVDFECTL-<br>EYWQ-QD-----KW-NGSFSVKWHIVKDVPNNI-LKHIILENNEGK-PVTNSRDTQDIN-----LEQGTQMLKIF         |

|                             |                |                 |                                                                                                                                                                                                                         |
|-----------------------------|----------------|-----------------|-------------------------------------------------------------------------------------------------------------------------------------------------------------------------------------------------------------------------|
|                             | Brast10G020600 | BstYTH<br>DF2A  | AK-----FFVIKSYSEDD--VHK--SIKYNVWASTPNGNKKLDSG---YR-----EAQEK-S-----<br>-----SECP----VFLFFS-----VNTSGQFV-----GVAEM---<br>VGPVDFDKTV-DYWQ-QD-----KW-NGCFSIKWHIVKDIPNNI-LKHITLDNNDNK-PVTNSRDTQEVK-----<br>LEQGLQMLKIF      |
|                             | Brast02G336900 | BstYTH<br>DF3A  | AK-----FFVIKSYSEDD--VHK--SIKYNVWASTPNGNKKLDTA---YQ-----AANDE-S-----<br>-----SKSP----VFLFFS-----VNTSGQFV-----GLAEM---<br>VGPVDFNKTV-EYWQ-QD-----KW-TGCFPVKWHIVKDIPNNL-LKHIILEYNENK-PVTNSRDTQEVK-----<br>LEQGLQVLKIF      |
| <i>Panicum<br/>virgatum</i> | Pavir.Db00395  | PviYTH<br>DC1Aa | SR-----YFIVKSCNREN--LEI--SVQQGIWATQRSNEAKLNEA---FE-----STEN-----<br>-----VILIFS-----INRTRHFQ-----GCAKM--TSRIGGYIGG-GNWK-<br>SA-----HGTAH-----Y-GRNFSMQWLKLCESFQK-THHLRNPYNDNL-PVKISRDCQELE-----PFIGEQLASLL              |
|                             | Pavir.Da00064  | PviYTH<br>DC1Ab | SR-----YFIVKSCNREN--LEI--SVQQGIWATQRSNEAKLNEA---FE-----STEN-----<br>-----VILIFS-----INRTRHFQ-----GCAKM--TSRIGGYIGG-GNWK-<br>SA-----HGTAH-----Y-GRNFSMQWLKLCESFQK-THHLRNPYNDNL-PVKVC                                     |
|                             | Pavir.Ea02386  | PviYTH<br>DF1C  | AL-----FFVIKSYSEDD--IHK--SIKYNVWASTPNGNKRLDNA---YR-----LAQER-MAE-----<br>-----KGTKCP----VFLFFS-----VNASGQFC-----GVAEM---<br>VGAVDFNRRNM-SFWQ-QD-----KW-NGFFSVKWHIIKDVPNPQ-FRHIILENNENK-PVTNSRDTQEVK-----<br>FPQGTEMLNIF |
|                             | Pavir.Eb02750  | PviYTH<br>DF2C  | AL-----FFVIKSYSEDD--IHK--SIKYNVWASTPNGNKRLDNA---YR-----LAQER-MAE-----<br>-----KGTKCP----VFLFFS-----VNASGQFC-----GVAEM---<br>VGPVDFNRRNM-NFWQ-QD-----KW-NGFFSVKWHIIKDVPNPQ-FRHIILENNENK-PVTNSRDTQEVK-----<br>FPQGTEMLNIF |
|                             | Pavir.J03441   | PviYTH<br>DF3C  | AK-----FFVIKSYNESD--VHK--SIKYGVWSTSSVGNRKLDAA---FR-----EAQAI-AAS-----<br>-----SSTLCP----VFLFFS-----VNESFNFC-----GVAEM---<br>VGPVDYQNDM-DFWC-KD-----KW-TGSFPVKWHIIKNIRNYT-FRSILLQNNYK-RVTWSRDTQEIH-----<br>YTPGTTMLELF   |
|                             | Pavir.Eb02265  | PviYTH<br>DF4C  | AK-----FFVIKSIGEAD--VHK--SIKYGVWSSSSNGNSKLDSA---FR-----DADRI-SRR-----<br>-----NSTKCP----VFLFFS-----VNGSGHFC-----GMAEM---<br>VGPVDFHKDM-DFWC-QD-----KW-TGCFPVRWHIVKDIPNYC-LQHITLQNNENK-PVTHSRDTQ EVP-----<br>YIPGMSVLKIF |
|                             | Pavir.Ea01248  | PviYTH<br>DF5C  | AK-----FFVIKSIGEAD--VHK--SIKYGVWSSSSNGNSKLDSA---FR-----DADRI-SRR-----<br>-----NSTKCP----VFLFFS-----VNGSGHFC-----GVAEM---<br>VGPVNFHKDM-DFWC-QD-----KW-TGCFPVRWHIVKDIPNYC-LQHITLQNNENK-PVTHSRDTQEIP-----YIPGMSVLKIF      |
|                             | Pavir.J39541   | PviYTH<br>DF1B  | AR-----FFIIKSYSEDN--VHK--SVKYGVWASTTNGNKKLDSA---YC-----EAKEK-----<br>-----EEHCP----IFLLFS-----VNASAQFC-----GVAEM---IGPVDFEKS V-<br>DYWQ-QD-----KW-TGQFPVKWHIVKDVPNNL-FRHIILENNDNK-PVTNSRDTQEVK-----LEQGLEMLKIF          |

|               |                |                                                                                                                                                                                                                    |
|---------------|----------------|--------------------------------------------------------------------------------------------------------------------------------------------------------------------------------------------------------------------|
| Pavir.Fa00200 | PviYTH<br>DF2B | AR-----FFIIKSYSEDN--VHK--SVKYGVWASTTNGNKKLDSA---YR-----EAKEK-----<br>-----EEHCP----IFLLFS-----VNASAQFC-----GVAEM--IGPVDFEKS<br>DYWQ-QD-----KW-TGQFPVKWHIVKDVPNNL-FRHIILENNENK-PVTNSRDTQEVK-----LEQGLEMLKIF         |
| Pavir.Fa01762 | PviYTH<br>DF3B | AK-----FFVIKSYTEDH--VHR--SIKYSVWASTASGNRKLDASA---YR-----AAKEK-----<br>-----EEHCP----IFLFFS-----VNGSGQFC-----GVAEM--IGPVDFDRSV-<br>DYWQ-QD-----KW-SGQFPVKWHIIKDVPNNL-LRHIILENNDNK-PVTNSRDTQEVK-----LEQGLQMLTIF      |
| Pavir.Fb00853 | PviYTH<br>DF4B | AK-----FFVIKSYTEDH--VHR--SIKYSVWASTASGNRKLDASA---YR-----AAKEK-----<br>-----EEHCP----IFLFFS-----VNGSGQFC-----GVAEM--IGPVDFDRSV-<br>DYWQ-QD-----KW-SGQFPVKWHIIKDVPNNL-LRHIILENNDNK-PVTNSRDTQEVK-----LEQGLQMLTIF      |
| Pavir.J38606  | PviYTH<br>DF5B | AK-----FFVIKSYTEDH--IHK--SIKYNVWASTATGNRKLNA---YR-----EAKDK-----<br>-----EELMA----VV-----TGQFC-----GVAEM--IGPVDFDMSV-<br>DYWQ-ND-----RW-SGQFPVKWHIVKDVPNNL-VRHIILGNNKDK-RVTNSRDTQEVK-----LEQGVQMLAIF               |
| Pavir.J11462  | PviYTH<br>DF6B | AK-----FFVIKSYTEDH--VHK--SIKYNVWASTARGNRKLNA---YR-----EAKDK-----<br>-----EEYCP----IFLFFS-----VNGSGQFC-----GVAEM---<br>IGPVDFDKSV-DYWQ-ND-----KW-SGQFPVKWHIVKDVPNNL-VRHIILENNEDK-RVTNSRDTQEVK-----<br>LEQGVQMLAIF   |
| Pavir.Ca00545 | PviYTH<br>DF6C | AK-----FFMIKSYSEDD--IHK--GIKYNVWASTANGNDKLDAA---YH-----EAQIL-MKE-----<br>-----NGENCP----VFLFFS-----VNTSGQFV-----GLAEM---<br>LGPVDFKKTMDFWK-GD-----KW-NGFFPIWHIIKDIPNRL-FKHIILEHNDYR-PVTFSRDTQEIG-----LAQGMQMLKIF   |
| Pavir.Ia04185 | PviYTH<br>DF1A | AK-----FFVIKSYSEDD--IHK--SIKYNVWASTTNGNKKLDAA---YQ-----EAQSK-G-----<br>-----SACP----IFLFFS-----VNTSGQFV-----GVAEM--TGAVDFEKT<br>EYWQ-QD-----KW-NGSFSVKWHIVKDVPNNI-LKHIILENNENK-PVTNSRDTQEIH-----LEQGLQMLKIF        |
| Pavir.Ib00367 | PviYTH<br>DF2A | AK-----FFVIKSYSEDD--IHK--SIKYNVWASTTNGNKKLDAA---YQ-----DSQSK-G-----<br>-----SACP----IFLFFS-----VNTSGQFV-----GVAEM--TGAVDFEKT<br>EYWQ-QD-----KW-NGSFSVKWHIVKDVPNNI-LKHIILENNENK-PVTNSRDTQEIH-----LEQGLQMLKIF        |
| Pavir.Ca01254 | PviYTH<br>DF3A | AK-----FFVIKSYSEDD--VHK--SIKYNVWASTPNGNKKLDAG---YR-----EAQEK-S-----<br>-----SDCP----VFLFFS-----VNTSGQFV-----GVAEM---<br>VGPVDLDKTV-EYWQ-QD-----KW-NGCFPLKWHIVKDVPNNI-LKHITLDNNDNK-PVTNSRDTQE                       |
| Pavir.J30385  | PviYTH<br>DF4A | AK-----FFVIKSYSEDD--VHK--SIKYNVWASTPNGNKKLDAG---YR-----EAQEK-S-----<br>-----SDCP----VFLFFS-----VNTSGQFV-----GVAEM---<br>VGPVDLDKTV-EYWQ-QD-----KW-NGCFPLKWHIVKDVPNNI-LKHITLDNNDNK-PVTNSRDTQE                       |
| Pavir.Ia00570 | PviYTH<br>DF5A | AK-----FFVIKSYSEDD--VHK--SIKYNVWASTPNGNKKLDAG---YR-----EAQEK-S-----<br>-----SDCP----VFLFFS-----VNTSGQFV-----GVAEM---<br>VGPVDFDKTV-EYWQ-QD-----KW-NGCFPLKWHIVKDVPNNI-LKHITLDNNDNK-PVTNSRDTQEVK-----<br>LEQGLEMLKIF |
| Pavir.J01552  | PviYTH<br>DF6A | AK-----IFVIKSYSEDD--VHK--SIKYNVWASTPNGNKKLDAG---YR-----EAQEK-S-----<br>-----SDCP----VFLFFS-----VNTSGQFV-----GVAEM---                                                                                               |

|                                |                                            |                |                                                                                                                                                                                                                                                                                                                                      |
|--------------------------------|--------------------------------------------|----------------|--------------------------------------------------------------------------------------------------------------------------------------------------------------------------------------------------------------------------------------------------------------------------------------------------------------------------------------|
|                                |                                            |                | VGPVDFDKTV-EYWQ-QD-----KW-NGCFPLKWHIVKDVPNNI-LKHITLDNNDNK-PVTNSRDTQEVK-----<br>LEQGLEMLKIF                                                                                                                                                                                                                                           |
|                                | Pavir.Ba03744                              | PviYTH<br>DF7A | AK-----FFIIKSYSEDD--VHK--SIKYNVWASTPNGNKKLDAA---YQ-----EAKEK-S-----<br>-----SETP----VFLLFS-----VNASGQFV-----GLAEM---<br>VGRVDFNKTIV-EHWQ-QD-----KW-TGCFPVKWHIVKDVPNSL-LKHIILENNENK-PVTNSRDTHEVK-----<br>LEQGLQVLKIF                                                                                                                  |
|                                | Pavir.J38005                               | PviYTH<br>DF8A | AK-----FFIIKSYSEDD--VHK--SIKYNVWASTPNGNKKLDAA---YQ-----EAKEK-S-----<br>-----CESP----VFLLFS-----VNASGQFV-----GLAKM---<br>VGRVDFNKTIV-EHWQ-QD-----KW-TGCFPVKWHIVKDVPNSL-LKHIILENNENK-PVTNSRDTHEVK-----<br>LEQGLQVLKIF                                                                                                                  |
| <i>Micromona<br/>s pusilla</i> | MicpuC2.fgenesh1_pg.<br>C_scaffold_8000034 | MpYTH          | VR-----FFVIKSFAEED--VRK--SVKHGCWTSTSQGNARLDAA---WRGEDVFTFEPHGD-----DEN-GDDERERE-----<br>REGEGETAAAAAAAAAADSSSGSGSGSGSDPASDAEPA-SDSDEPSVRSVDTQTPGPPLLDDATPATAESATKTTIAPCSRPGSSGAPPSKPRVILFFS-----<br>-----VNSSGHFC-----GVAEM---TSPVD-----DDAVDATLLP-----PAAA-----<br>ASW-PGRFAVKWHIVKDVPNTA-LRHIRVCAGDKK-PVPNSRDAQEIE-----PAQGALVLNIF |
| <i>Micromona<br/>s commoda</i> | EuGene.1100010578                          | McYTH          | VR-----FFVMKSHGEDD--VHR--SLRYGWWSSTQAGNARLYAA---FRGLDAGEGESLGDLPKTLDESCGMDDLDRAFIVNAVKEDGDETEVLAP-----<br>---DLSDISRDSEESDSPSPAGPL-----EASTADAAAADRAT----SKDRAETP---RVVLFFS-----<br>VNCSGHFC-----GVAEM---IGPVE---RI-DPTAPRDAHLRSGGGGGGGGGGGGGGGGGPRRFPAASMLTNGFALA-<br>DGRFKVRWHWVKDVPNTV-LRHIRLVAGNEK-PVTNSRDAQEVE-----PGQGAMVLSVF  |

\*All accession numbers relate to the Uniprot, NCBI, and Phytozome databases

\*\* In cases when a name was already attributed to a protein, this name was kept with the new name, refering to the species of origin and to the phylogenetic classification of the protein, added in parenthesis

**Supplementary Table S4** the relative expression level of 77 organismal-development-related genes used for heatmap analysis.

| gene_id        | gene symble                                  | Log2FC    |           |           |
|----------------|----------------------------------------------|-----------|-----------|-----------|
|                |                                              | osythdf1a | osythdf2a | osythdf3a |
| LOC_Os02g13310 |                                              | -9.5619   | -1.0855   | -4.1578   |
| LOC_Os03g51710 | <i>OSH3</i>                                  | -8.9869   | -1.3526   | -7.0396   |
| LOC_Os01g46870 |                                              | -8.9168   | -1.5943   | -5.3881   |
| LOC_Os04g45330 | <i>OsYABBY5; OsYAB3; TOB1</i>                | -8.615    | -1.2943   | -4.3509   |
| LOC_Os12g36890 | <i>OsCSLD4; NRL1; NDI; sle1; DNL1; OsCD1</i> | -8.0836   | -1.1736   | -5.0574   |
| LOC_Os09g34930 |                                              | -7.8626   | -1.2858   | -3.9654   |
| LOC_Os03g14080 | <i>OsAUX2</i>                                | -7.7898   | -1.3768   | -4.9957   |
| LOC_Os07g03250 | <i>Crl-5</i>                                 | -7.7566   | -1.3525   | -4.6714   |
| LOC_Os01g33040 | <i>DBS1; OsNACK</i>                          | -7.5488   | -1.2459   | -3.6439   |
| LOC_Os04g48510 | <i>OsGRF12</i>                               | -7.4847   | -1.2526   | -4.1748   |
| LOC_Os04g51000 | <i>RFL; APO2</i>                             | -7.3429   | -2.1784   | -6.2554   |
| LOC_Os10g05690 | <i>OsAUX4</i>                                | -7.318    | -1.1632   | -3.9296   |
| LOC_Os04g56850 | <i>OsARF11; OsMP; OsARF5</i>                 | -7.3041   | -1.0846   | -4.1656   |
| LOC_Os01g67100 | <i>FSM; CAF-1</i>                            | -7.1895   | -1.0183   | -3.4899   |
| LOC_Os10g26340 | <i>PLA1</i>                                  | -7.0451   | -1.0395   | -7.8152   |
| LOC_Os08g40170 | <i>CDKB2;1; cdc2Os3</i>                      | -6.9668   | -1.1371   | -3.5603   |
| LOC_Os08g41360 |                                              | -6.9401   | -3.3398   | -2.7567   |
| LOC_Os01g62605 |                                              | -6.7356   | -1.1936   | -4.7526   |
| LOC_Os04g28620 |                                              | -6.6957   | -5.648    | -7.9919   |
| LOC_Os11g04190 | <i>OsPIN1c; OsPIN1b</i>                      | -6.5802   | -1.191    | -3.375    |
| LOC_Os03g10040 |                                              | -6.2745   | -1.7185   | -4.2933   |
| LOC_Os02g03120 |                                              | -6.2414   | -2.663    | -2.3359   |
| LOC_Os03g56050 |                                              | -6.1617   | -1.3587   | -5.2617   |
| LOC_Os06g10310 | <i>OsGRF2</i>                                | -6.1049   | -1.2917   | -5.0023   |
| LOC_Os12g10670 |                                              | -6.0781   | -1.3261   | -3.8577   |
| LOC_Os05g27980 |                                              | -6.0617   | -1.3375   | -3.7453   |
| LOC_Os02g28850 |                                              | -5.9803   | -1.1244   | -3.4852   |
| LOC_Os03g41600 |                                              | -5.8846   | -2.1204   | -1.9548   |
| LOC_Os03g11600 | <i>DL; OsYABBY</i>                           | -5.8114   | -1.7158   | -3.8138   |
| LOC_Os04g38570 | <i>OsABCB14</i>                              | -5.7616   | -1.4281   | -3.2766   |
| LOC_Os12g38400 | <i>OsMYB91</i>                               | -5.7002   | -1.2739   | -4.2461   |

|                |                                     |         |         |         |
|----------------|-------------------------------------|---------|---------|---------|
| LOC_Os03g49880 | <i>OsTB1; FCI; SCM3</i>             | -5.5398 | -1.7117 | -6.3093 |
| LOC_Os04g02640 |                                     | -5.3723 | -1.5771 | -6.279  |
| LOC_Os04g33560 |                                     | -5.3588 | -1.0619 | -3.1647 |
| LOC_Os08g42600 | <i>OsRBR1; PIS1</i>                 | -5.3002 | -1.0986 | -3.0869 |
| LOC_Os04g28260 |                                     | -5.2725 | -1.0827 | -2.8998 |
| LOC_Os06g36680 |                                     | -5.2476 | -1.8521 | -3.2175 |
| LOC_Os12g03130 |                                     | -4.9757 | -1.1114 | -3.9286 |
| LOC_Os01g15480 |                                     | -4.6478 | -1.1559 | -3.0775 |
| LOC_Os04g13140 |                                     | -4.363  | -1.2208 | -2.5563 |
| LOC_Os01g07480 | <i>OsCrll4</i>                      | -4.0908 | -1.1631 | -1.6119 |
| LOC_Os04g43300 |                                     | -4.0777 | -1.0175 | -2.418  |
| LOC_Os07g49140 |                                     | -3.9888 | 1.3961  | -3.0252 |
| LOC_Os09g36160 |                                     | -3.8437 | -1.1961 | -4.6417 |
| LOC_Os09g25100 |                                     | -3.741  | -1.2983 | -5.5075 |
| LOC_Os01g55560 |                                     | -3.7138 | -1.5581 | -3.2888 |
| LOC_Os07g07920 |                                     | -3.5831 | 1.4895  | -2.6613 |
| LOC_Os04g46580 | OSSPL7                              | -3.4951 | -1.635  | -3.2    |
| LOC_Os10g25620 |                                     | -3.3118 | -4.0817 | -2.3927 |
| LOC_Os02g46970 |                                     | -3.2992 | -1.1604 | -4.2757 |
| LOC_Os06g49830 |                                     | -3.1737 | -1.2646 | -5.8352 |
| LOC_Os08g31030 |                                     | -2.9736 | 1.087   | -1.2371 |
| LOC_Os07g17210 |                                     | -2.7093 | 2.2462  | -1.8848 |
| LOC_Os03g02800 | <i>RIM1</i>                         | -2.645  | 1.0142  | -2.1354 |
| LOC_Os06g15020 |                                     | -2.2586 | 1.6406  | 1.5527  |
| LOC_Os01g12440 |                                     | -2.2399 | -1.8037 | -2.0165 |
| LOC_Os01g34560 |                                     | -2.2126 | 1.3549  | -1.1105 |
| LOC_Os01g66100 | <i>sd1; OsGA20ox2; qSD1-2; qPAI</i> | -2.1301 | -1.0491 | -1.9423 |
| LOC_Os03g58600 | <i>OsMEL1</i>                       | -2.1155 | 1.2839  | -2.1407 |
| LOC_Os02g58490 | <i>OsAGO1c</i>                      | -1.8356 | -1.2321 | -1.1439 |
| LOC_Os04g47080 |                                     | -1.7186 | 1.081   | 2.543   |
| LOC_Os05g44090 |                                     | -1.5961 | -1.6446 | -2.3388 |
| LOC_Os01g66590 | <i>OsCrll3; OsIG1; OsAS2</i>        | -1.5556 | -1.0164 | -2.4638 |
| LOC_Os06g11330 |                                     | -1.2077 | -1.1194 | -1.0372 |
| LOC_Os11g35710 |                                     | -1.0678 | 3.5252  | -1.6476 |
| LOC_Os01g18360 |                                     | 1.1451  | 1.7689  | 2.0873  |
| LOC_Os01g25010 |                                     | 1.3611  | 1.1524  | 1.8913  |
| LOC_Os04g40140 |                                     | 1.4495  | 2.645   | 1.5658  |



|                |               |        |        |        |
|----------------|---------------|--------|--------|--------|
| LOC_Os06g19540 |               | 1.5108 | 1.6758 | 1.6269 |
| LOC_Os01g58860 | <i>OsPIN9</i> | 1.5857 | 2.1314 | 1.4208 |
| LOC_Os02g12350 |               | 1.6883 | 2.0187 | 2.0254 |
| LOC_Os03g59600 |               | 1.8122 | 2.3614 | 1.9622 |
| LOC_Os01g58194 |               | 1.8911 | 1.3941 | 1.3227 |
| LOC_Os08g29660 |               | 2.2899 | 1.0293 | 1.0592 |
| LOC_Os01g50100 |               | 2.8393 | 1.6911 | 1.4538 |
| LOC_Os01g64470 |               | 2.9377 | 1.9662 | 1.4414 |
| LOC_Os04g12960 |               | 2.9503 | 3.1572 | 1.1924 |

**Supplementary Table S5 Primers used in this study**

|                               |                           |
|-------------------------------|---------------------------|
| Primer used for qPCR analysis |                           |
| RT-DF3C-2F                    | GTGAAGCCACAGGGTAGTAATG    |
| RT-DF3C-2R                    | GTCTGTTCTCTTTCCCGTCATC    |
| RT-DF1C-1F                    | TCCTCGAAGACTGCAAACAAGGC   |
| RT-DF1C-1R                    | ATGCACCGCAAAC TTGCTAGAC   |
| RT-DF1A-1F                    | AGCCGTGACACACAAGAGGTAAAC  |
| RT-DF1A-1R                    | TCCTGCATCAACTTCTGACGGTTC  |
| RT-DF2C-2F                    | GAAGCGAAAGGCAATGGTAATG    |
| RT-DF2C-2R                    | GGCTCACCTGCCACATTTA       |
| RT-DF2A-1F                    | AAGCTGATGCAGGAGAAGAGAGC   |
| RT-DF2A-1R                    | CATTGTCAAGAGAGCCCTGTCC    |
| RT-DF5C-2F                    | GAGGCACATCCACAGCTAAA      |
| RT-DF5C-2R                    | GCCCATCTTGAACCTCTGATTA    |
| RT-DF3B-1F                    | CATTGGCTTCTGGAATGCATCAGG  |
| RT-DF3B-1R                    | TTGCTGCCGTGCCTTGTATGAC    |
| RT-DF4C-2F                    | TCAGCAAGGTTCCATCTCTTC     |
| RT-DF4C-2R                    | GGTCAGCCTTTGTGCATTTC      |
| RT-DC1A-1F                    | GGTGAGCAATTGGCTTCACTGC    |
| RT-DC1A-1R                    | GCTGCAATTAGTATAGCCGTCAGC  |
| RT-DF3A-1F                    | AGACGTCGTTACTGGATGACTTTG  |
| RT-DF3A-1R                    | GCAGCTTCTCATCAACGACCTTC   |
| RT-DF2B-2F                    | AGAAAGCCTTGCAGGAGAATAG    |
| RT-DF2B-2R                    | GTCTGAGATGTGGGCCATAAG     |
| RT-DF1B-2F                    | CTGATAACCCTGAAGAGCAGAC    |
| RT-DF1B-2R                    | GCTTGTCCCTTCACTTGGTAGAT   |
| RT-DF3C-1F                    | TCTAGTGGAACAGCAAAC TGGAC  |
| RT-DF3C-1R                    | AGAAGAGCCCACTACCATT CACG  |
| RT-OE-2-F                     | CTGAGATGGTCGGTCCGGTAGAT   |
| RT-OE-2-R                     | TCCCTGCTGTTTGT CACAGGTTT  |
| RT-OE-3-F                     | GGCAGTTTGT TGGTGTTGCTGAA  |
| RT-OE-3-R                     | CGGCTATTTGTCACTGGCTTG TTC |
| RT-DF2C-1F                    | AGGAAGAGCTCTGGGAAAGTGTC   |
| RT-DF2C-1R                    | AACTGCCCCGCTAGCATTAACAG   |
| RT-OE-7-F                     | GATGATTGGACCTGTGGACTTCG   |
| RT-OE-7-R                     | AGGCTGTTCGGGACATCCTTGAT   |

|                                     |                                                            |
|-------------------------------------|------------------------------------------------------------|
| RT-OE-8-F                           | CAGTGGGCAGTTTGTAGGATTAG                                    |
| RT-OE-8-R                           | AACCGATTTGGAATGTCCTTTATA                                   |
| Primer used for vector construction |                                                            |
| DF3C-CF                             | AGATGATCCGTGGCA TTATCCGTATGGTTATACGTTTTAGAGCTATGC          |
| DF3C-CR                             | GCATAGCTCTAAAACGAAAATAGATGTCTTGGCCTGAGCCTCAGCGCAGCAGCTTA   |
| DF1C-CF                             | AGATGATCCGTGGCA ATATCCATTTTCATACCCGTTTTAGAGCTATGC          |
| DF1C-CR                             | GCATAGCTCTAAAACGATTTTGTTACGAAGTATCTGAGCCTCAGCGCAGCAGCTTA   |
| DF1A-CF                             | AGATGATCCGTGGCACGTCGCGCCGCCTCAGGTCCGTTTTAGAGCTATGC         |
| DF1A-CR                             | TTCTAGCTCTAAAACGGACCTGAGGCGGCGCAGCGCTGAGCCTCAGCGCAGCAGCTTA |
| DF2C-CF                             | AGATGATCCGTGGCA ATCACACTAATTTTGTGGGTTTTAGAGCTATGC          |
| DF2C-CR                             | GCATAGCTCTAAAAC TATTGTATTGGTCAGGATCTGAGCCTCAGCGCAGCAGCTTA  |
| DF2A-CF                             | AGATGATCCGTGGCAGTCGATCACTCCCCTGCTCCGTTTTAGAGCTATGC         |
| DF2A-CR                             | TTCTAGCTCTAAAACAACAGTTGGGACAGGAGAACCTGAGCCTCAGCGCAGCAGCTTA |
| DF5C-CF                             | AGATGATCCGTGGCATATCATTCAGAAGAACGCGTTTTAGAGCTATGC           |
| DF5C-CR                             | GCATAGCTCTAAAACGTATCTTGGATCTTGTGCTGAGCCTCAGCGCAGCAGCTTA    |
| DF3B-CF                             | AGATGATCCGTGGCATCTTCCCATTGACCCAGAGTTTTAGAGCTATGC           |
| DF3B-CR                             | GCATAGCTCTAAAACGTGCAGATGGAAGTATGCTGAGCCTCAGCGCAGCAGCTTA    |
| DF4C-CF                             | AGATGATCCGTGGCAACCAACATCCTCAGTGCAGTTTTAGAGCTATGC           |
| DF4C-CR                             | GCATAGCTCTAAAAC TTGCATTCTGGTCAGTGGCTGAGCCTCAGCGCAGCAGCTTA  |
| DC1A-CF                             | AGATGATCCGTGGCAGCACTCGTCCGACCCCGGTTTTAGAGCTATGC            |
| DC1A-CR                             | GCATAGCTCTAAAACGGGGATGGCGGCGGGCACCTGAGCCTCAGCGCAGCAGCTTA   |
| DF3A-CF                             | AGATGATCCGTGGCATCCACATACCTGAGCCATGAGTTTTAGAGCTATGC         |
| DF3A-CR                             | TTCTAGCTCTAAAACGAAGTTGAATAACCATATGGCTGAGCCTCAGCGCAGCAGCTTA |
| DF2B-CF                             | AGATGATCCGTGGCAAGAGTGCTGCTAAAGAGCGTTTTAGAGCTATGC           |
| DF2B-CR                             | GCATAGCTCTAAAACGGAGATAACATGATTGACCTGAGCCTCAGCGCAGCAGCTTA   |
| DF1B-CF                             | AGATGATCCGTGGCATATCAATCTACCAAGTGAGTTTTAGAGCTATGC           |
| DF1B-CR                             | GCATAGCTCTAAAACC TTGTGTTGGGTCAATCGCTGAGCCTCAGCGCAGCAGCTTA  |
| SacIL-DF2CF                         | TTCTGCACTAGGTACAGGCCTGTTTCAGCCCACCACAGATTTCA               |
| SacIR-DF2CR                         | CTGACGTAGGGGCGATAGAGCTCTGTTGCTTTGCCTTGTCCACT               |
| SnaBIR-DF2CF                        | CGGGGATCCGTCGACTACTTCAGCCCACCACAGATTTCA                    |
| SnaBIL-DF2CR                        | AGGTGGAAGACGCGTTACTGTTGCTTTGCCTTGTCCACT                    |
| SacIL-DC1AF                         | TTCTGCACTAGGTACAGGCCTGGCATACAAGCACTCCTACGACGAT             |
| SacIR-DC1AR                         | CTGACGTAGGGGCGATAGAGCTCCGACGAGCCATTTGGAACAGA               |
| SnaBIR-DC1AF                        | CGGGGATCCGTCGACTACGCATACAAGCACTCCTACGACGAT                 |
| SnaBIL-DC1AR                        | AGGTGGAAGACGCGTTACCGACGAGCCATTTGGAACAGA                    |
| DF3C-dn-F                           | TCCGGAGCTAGCTCTAGAATGCGAGTGGA CTATCCCTTT                   |

|                                |                                          |
|--------------------------------|------------------------------------------|
| DF3C-dn-R                      | CCTCGAGACGTCTCTAGACTTCACTTTGATAGCCTT     |
| DF1C-dn-F                      | TCCGGAGCTAGCTCTAGAAATGGTTACGAAGTATGATCAA |
| DF1C-dn-R                      | CCTCGAGACGTCTCTAGATTTACATGAAAAGTTCTT     |
| DF1A-dn-F                      | TCCGGAGCTAGCTCTAGAAATGCCTGTCCAATATGATGAT |
| DF1A-dn-R                      | CCTCGAGACGTCTCTAGACTTACTGACATGCTCCTT     |
| DF2C-dn-F                      | TCCGGAGCTAGCTCTAGAAATGCCTGTTGATCATCCAGAT |
| DF2C-dn-R                      | CCTCGAGACGTCTCTAGATGTCAATGGGCCATCCTT     |
| DF3B-dn-F                      | TCCGGAGCTAGCTCTAGAAATGGTTATTGAGTATGAGGAT |
| DF3B-dn-R                      | CCTCGAGACGTCTCTAGACTCGACCTCATGGTTCTT     |
| DF4C-dn-F                      | TCCGGAGCTAGCTCTAGAAATGACAGTTCAGTATGAGCAT |
| DF4C-dn-R                      | CCTCGAGACGTCTCTAGATCCCTGGTGATATGCCTT     |
| primer used for PCR sequencing |                                          |
| CRAC-DF2B-F                    | CGACTCTGGGTAATCGGAGGAGG                  |
| CRAC-DF2B-R                    | TAGGAGAGGCTGGTGGCTGGTAGT                 |
| CRAC-DF3C-F                    | TTGACTTTTCCAGGTTACCAAACCTT               |
| CRAC-DF3C-R                    | AACAGGAGGAACTGAGGGTAATG                  |
| CRAC-DF1B-F                    | GGATTCGCAGGAGCCAAGAGTTG                  |
| CRAC-DF1B-R                    | TGAGGTGAAGCCGCAGGTGATG                   |
| CRAC-DF1C-F                    | GCCATATCTGTGGCATCAGGATT                  |
| CRAC-DF1C-R                    | AAGGTTTGGACGCCTCCTATTCT                  |
| CRAC-DF2C-F                    | CAGGGTCTTTATTATCCAGCAAC                  |
| CRAC-DF2C-R                    | ACAGGCTTGTTCTCGTTATTCTC                  |
| CRAC-DF5C-F                    | AAATGTCATCGGGAAGTGGGTAT                  |
| CRAC-DF5C-R                    | GGATTACATGCAAGAAAATGAGGAC                |
| CRAC-DF3B-F                    | TTGGGTAAAGGTGGAGAACAACA                  |
| CRAC-DF3B-R                    | CCCAGGAGTTGGTGAATACAGAAG                 |
| CRAC-DF4C-F                    | AAGCCAGGACACTTGGAAGAGTATA                |
| CRAC-DF4C-R                    | CAAAGGAGGGATGGCATTATTCT                  |
| CRAC-DC1A-F                    | GTCCCAAGTCCCAACTCCCAAC                   |
| CRAC-DC1A-R                    | CTCCAACCCAAGAGCTAACAAACG                 |

**Supplementary Table S6 Log2 expression changes of abiotic response genes in OsYTH mutants.**

| gene_id        | gene symble         | Log2FC           |                  |                  |                  |                  |                  |                  |                  |                  |                  |
|----------------|---------------------|------------------|------------------|------------------|------------------|------------------|------------------|------------------|------------------|------------------|------------------|
|                |                     | <i>osythdf1a</i> | <i>osythdf2a</i> | <i>osythdf3a</i> | <i>osythdf1b</i> | <i>osythdf2b</i> | <i>osythdf3b</i> | <i>osythdf1c</i> | <i>osythdf3c</i> | <i>osythdf4c</i> | <i>osythdf5c</i> |
| LOC_Os11g04020 | OsTOM1              | 3.2792           | 7.4229           | 4.4971           | -10.2747         | -7.1067          | -1.8743          | -10.7481         | -8.1509          | -1.2217          | -8.441           |
| LOC_Os11g26790 | RAB21; Rab16A       | -0.7541          | 0.655            | -4.6795          | -2.1252          | -6.0341          | -4.334           | -0.9926          | -3.8629          | -6.5668          | -7.2578          |
| LOC_Os01g72370 | OsIRO2              | -1.0762          | 4.1649           | 3.7685           | -3.4543          | -3.26            | 0.1071           | -6.3446          | -6.929           | 0.1176           | -2.3838          |
| LOC_Os03g17790 | OsRCI2-5            | 0.3925           | 0.7344           | -0.7367          | -4.1495          | -5.0063          | -2.5996          | -3.7051          | -2.0998          | -3.9781          | -1.8866          |
| LOC_Os03g12820 | OsSRO1c; BOC1       | 0.2927           | 0.9939           | -1.0999          | -4.1682          | -3.8594          | -2.9352          | -3.3651          | -4.2107          | -4.9093          | -2.6602          |
| LOC_Os02g10760 | OsWR1               | -0.1569          | 1.6293           | 0.2219           | -2.7727          | -1.758           | -1.0787          | -4.462           | -0.3951          | -1.1819          | -1.0965          |
| LOC_Os04g28420 | rFKBP65             | -0.0126          | 1.9587           | 1.2482           | -1.9999          | -1.9103          | -1.6581          | 0.0152           | -0.7631          | -2.3771          | -0.5023          |
| LOC_Os12g39400 | ZFP252; RZF71       | -0.8923          | -0.3044          | -1.9578          | -2.7631          | -1.7294          | -1.0259          | -2.4661          | -2.6747          | -1.319           | -2.3747          |
| LOC_Os01g04800 | OsRAV2              | 0.798            | -0.272           | -0.7896          | -2.0584          | -1.0062          | -1.7092          | -0.2974          | -2.1543          | -2.1038          | -2.4577          |
| LOC_Os05g34830 | OsNAC52             | 1.0026           | -0.0645          | -0.0199          | -2.9351          | -1.6469          | -1.1573          | -0.1372          | -3.4641          | -2.1139          | -1.4226          |
| LOC_Os03g44380 | OsNCED3             | 2.0449           | -2.3295          | 1.1522           | -1.3779          | -0.0272          | -0.7932          | 0.868            | -3.2871          | -4.9982          | 0.3461           |
| LOC_Os03g32230 | bsr-d1; ZOS3-12     | 6.1221           | 2.1551           | 1.6753           | -1.112           | -1.3549          | -4.0854          | 1.9422           | -2.2745          | -3.5644          | -1.0873          |
| LOC_Os02g41510 | OsMYB30             | 5.2242           | 1.7389           | 1.669            | -0.3266          | 0.7217           | -3.2884          | 2.0153           | -1.1565          | -0.518           | -1.2932          |
| LOC_Os01g61080 | OsWRKY24            | 3.7233           | 0.1532           | 1.1274           | -0.8505          | 0.7542           | -1.4353          | 3.2491           | -1.8999          | -2.7649          | -1.7122          |
| LOC_Os07g26640 |                     | 2.0774           | 3.1019           | 2.0239           | 1.5806           | 4.3036           | 0.2312           | 1.7276           | 3.3047           | 3.4691           | -1.2601          |
| LOC_Os02g55890 | OVP3                | 0.7099           | 2.2184           | 0.8049           | 2.6642           | 2.6268           | -1.1854          | 1.3301           | 3.3235           | 3.3431           | 0.0764           |
| LOC_Os07g26660 |                     | 1.2386           | 2.0218           | 0.9646           | 1.1967           | 2.1181           | -2.6716          | -2.2566          | 2.9063           | 0.5398           | 0.3232           |
| LOC_Os03g20370 | OsCam1-1            | 1.2014           | -0.4156          | 0.5156           | 1.5053           | 1.0869           | -1.1379          | 1.4713           | 1.4145           | -0.3582          | 0.6861           |
| LOC_Os02g47470 | OsABA8ox1           | 2.0725           | -1.1284          | 0.3294           | 1.0176           | 2.7681           | -1.5304          | 3.2839           | 2.6201           | -0.2035          | 0.3795           |
| LOC_Os06g29790 | OsPHO1;3            | 1.3371           | -0.0175          | 0.4666           | 1.4351           | 1.2341           | 1.4791           | 0.7457           | 0.7633           | 0.1743           | 0.2197           |
| LOC_Os05g51830 | OsHDT1;HDT701       | -0.5294          | -0.5258          | -0.4             | 2.5687           | 1.6139           | 0.1734           | 1.5598           | 2.6592           | 1.0175           | 1.756            |
| LOC_Os02g53130 | OsNR2; qCR2         | 0                | -1.6365          | 0.5677           | 2.0279           | 4.1125           | -1.5243          | 4.0553           | 2.1721           | -3.1336          | 2.7605           |
| LOC_Os04g51820 | OsHKT1;1;<br>OsHKT4 | 4.0549           | 1.4687           | 3.1727           | 0.314            | 1.3998           | -0.9731          | 1.8912           | 0.1022           | -0.6739          | 1.5438           |
| LOC_Os06g48800 | OsHKT2;4;<br>OsHKT9 | 3.1048           | -0.1044          | 2.5841           | -0.0156          | 1.255            | 0.9039           | 1.8172           | -1.6154          | -1.2601          | 1.5969           |
| LOC_Os02g52150 | OsHSP24.1           | 1.4966           | 1.7964           | 1.6875           | 0.0918           | 0.3772           | -0.9207          | 1.802            | 0.6593           | -0.6719          | 1.2121           |
| LOC_Os02g07830 | OsHKT1;3;<br>OsHKT6 | 1.7307           | 1.0571           | 1.8045           | 0.38             | 0.776            | 0.2489           | 1.4869           | -0.3678          | -0.5899          | 1.3482           |
| LOC_Os02g10780 | OsSPX2              | 2.3781           | 1.6273           | 1.7887           | 0.5156           | 0.5315           | 0.1733           | 0.2543           | -1.5674          | -0.5151          | 1.1946           |
| LOC_Os04g01740 | OsHSP1              | -4.1178          | 1.5218           | -1.864           | -1.5222          | -4.3195          | -0.4964          | -1.3461          | -2.0332          | -2.078           | -2.3704          |
| LOC_Os02g56920 | OsGL1-6             | -5.5386          | -0.3876          | -2.648           | -1.8512          | -3.6289          | 1.0069           | -5.2235          | -0.1738          | 0.3328           | 1.4248           |
| LOC_Os06g40150 | OsWR2               | -7.1935          | 0.3689           | -3.9251          | -1.7815          | -1.4235          | -1.5792          | -6.3569          | -0.1031          | -0.7874          | -1.3909          |
| LOC_Os01g15830 | OsPOX1; ddOs319     | -2.9293          | 0.2039           | -1.7504          | -1.0154          | -1.7262          | -1.1592          | -2.573           | 0.7427           | 0.2868           | -0.3067          |

|                |          |         |         |         |         |         |         |         |        |        |         |
|----------------|----------|---------|---------|---------|---------|---------|---------|---------|--------|--------|---------|
| LOC_Os06g12230 | OsTCP19  | -2.373  | -1.6345 | -2.4699 | -0.2134 | -1.2238 | 0.4586  | -0.7745 | 0.6985 | 0.7167 | -0.4599 |
| LOC_Os03g06970 | OsSDI1   | -2.8728 | 1.0974  | -2.9134 | -0.7493 | -0.9865 | 0.7087  | -1.5789 | -1.506 | 0.7097 | -1.1904 |
| LOC_Os02g58220 | OsRPA2   | -7.2101 | -0.7715 | -3.5271 | 1.995   | -1.3754 | -0.072  | -4.3319 | 2.3253 | 1.4308 | -2.4158 |
| LOC_Os12g38400 | OsMYB91  | -5.7002 | -1.2739 | -4.2461 | 1.2356  | 0.0297  | 0.2821  | -0.263  | 1.8048 | 0.8423 | 0.558   |
| LOC_Os05g01730 | OsDi19-6 | -3.9695 | -0.1226 | -3.0293 | 2.1234  | -1.0876 | -1.1294 | -1.6512 | 1.8631 | 0.3397 | -0.4102 |
| LOC_Os02g18410 |          | -5.9437 | -0.3254 | -4.3456 | 2.4406  | 1.4235  | -1.6656 | 0.237   | 3.3962 | 1.4854 | 0.5697  |
| LOC_Os02g41904 | CAL1     | -8.2648 | -1.4899 | -3.6824 | 5.8619  | -0.0508 | -2.0616 | -2.6434 | 5.5899 | 5.2243 | -3.1448 |
| LOC_Os01g56940 | OsEXO1   | -5.418  | -1.4427 | -3.7897 | 3.7485  | -1.23   | 1.0147  | -1.0311 | 3.8296 | 3.0369 | -1.2945 |
| LOC_Os10g05690 | OsAUX4   | -7.318  | -1.1632 | -3.9296 | 4.6849  | -0.6765 | 0.4562  | -2.3334 | 4.6487 | 3.8861 | 0.9784  |

**Supplementary Table S7 Log2 expression changes of biotic-response genes in OsYTH mutants.**

| gene_id        | gene symble              | Log2FC           |                  |                  |                  |                  |                  |                  |                  |                  |                  |
|----------------|--------------------------|------------------|------------------|------------------|------------------|------------------|------------------|------------------|------------------|------------------|------------------|
|                |                          | <i>osythdf1a</i> | <i>osythdf2a</i> | <i>osythdf3a</i> | <i>osythdf1b</i> | <i>osythdf2b</i> | <i>osythdf3b</i> | <i>osythdf1c</i> | <i>osythdf3c</i> | <i>osythdf4c</i> | <i>osythdf5c</i> |
| LOC_Os09g25070 | OsWRKY62                 | 0.0533           | 1.5696           | 0.8971           | -4.9948          | -2.0432          | 1.0718           | -3.6035          | -3.4029          | 2.0691           | -1.7991          |
| LOC_Os12g12010 |                          | -2.9448          | -0.6273          | -0.1078          | -1.7396          | -1.3692          | -2.5783          | -0.7713          | -1.8189          | -1.7731          | -0.5742          |
| LOC_Os12g11370 |                          | -0.4841          | 0.0032           | -0.1538          | -1.3639          | -2.0095          | -2.8819          | -1.5858          | -1.2705          | -1.8403          | -1.4848          |
| LOC_Os12g17490 |                          | 0.0447           | 0.0132           | 0.3972           | -2.0656          | -2.7488          | -3.1688          | -2.4434          | -2.5546          | -2.3857          | -2.1736          |
| LOC_Os12g12130 |                          | 3.3146           | 0.8731           | 0                | -3.4064          | -3.4094          | -3.7111          | -2.8352          | -3.4961          | -3.3526          | -3.21            |
| LOC_Os02g14430 | OsPrx30                  | 1.1716           | -2.573           | -0.7368          | -1.8581          | -1.6216          | -2.7997          | -3.0237          | -4.0243          | -1.8807          | -2.8318          |
| LOC_Os10g10130 | OsWAK112d                | 0.8629           | -1.0833          | 0.2204           | -3.275           | -1.789           | -0.1616          | -2.0453          | -4.9201          | -2.8534          | -3.2814          |
| LOC_Os08g39840 | OsHI-LOX; RLL;<br>OsLOX9 | 3.5757           | 1.7762           | 1.5257           | -4.5029          | -2.5147          | -1.7191          | -0.8563          | -7.079           | -5.7451          | -4.5283          |
| LOC_Os08g04500 | OsTPS3                   | 2.5124           | -1.0556          | 2.5999           | -0.8625          | -0.0785          | 0.7725           | 1.3457           | -4.3147          | -4.9098          | 0.6238           |
| LOC_Os10g25230 | OsJAZ13; OsTIFY11e       | 3.9878           | -1.7234          | 1.7672           | -1.071           | 0.6581           | -3.9918          | 1.6437           | -4.6038          | -5.0541          | -1.1949          |
| LOC_Os06g44010 | OsWRKY28                 | 3.7097           | 0.8182           | 0.948            | -1.3869          | 1.2229           | -1.8984          | 4.3396           | -2.2113          | -2.1322          | -1.3793          |
| LOC_Os03g32230 | bsr-d1; ZOS3-12          | 6.1221           | 2.1551           | 1.6753           | -1.112           | -1.3549          | -4.0854          | 1.9422           | -2.2745          | -3.5644          | -1.0873          |
| LOC_Os04g48850 | OsACS2                   | 3.9619           | 1.3443           | 0.6496           | -3.5308          | -1.3392          | -2.1932          | 0.8451           | -2.9741          | -3.2949          | -3.6599          |
| LOC_Os11g32170 |                          | 1.5952           | 2.0732           | 2.3441           | 0.3862           | 0.6695           | -2.2404          | 1.2968           | 2.3036           | 0.0886           | -1.8319          |
| LOC_Os09g14100 |                          | 2.1577           | 2.3398           | 1.9147           | -0.5393          | 0.458            | -0.6742          | -1.0567          | 1.1318           | 1.9078           | -1.0003          |
| LOC_Os02g02640 |                          | 1.5195           | 1.6044           | 1.1555           | 0.0285           | 0.3489           | -0.0797          | -0.2442          | 0.4534           | 1.6391           | -0.2275          |
| LOC_Os05g31570 |                          | 4.3948           | 3.2984           | 4.2185           | -0.1273          | 0.365            | -0.1255          | 0.5004           | -0.4252          | -0.7325          | -0.0983          |
| LOC_Os11g12320 |                          | 3.2207           | 1.592            | 2.7703           | 0.3338           | 1.1138           | -0.8846          | 1.0601           | -0.4016          | -0.0646          | 0.3713           |
| LOC_Os03g40194 |                          | 2.0885           | 1.1023           | 1.578            | 0.1987           | 0.4965           | 0.8544           | 1.0377           | -0.3525          | -0.5318          | 0.068            |
| LOC_Os11g12340 | OsRSR1                   | 2.681            | 1.4543           | 1.6456           | -0.6367          | 0.0562           | -0.5726          | 0.4214           | -1.476           | -0.6402          | -0.2096          |
| LOC_Os06g03500 | Bph37                    | 1.5276           | 1.268            | 1.134            | -1.1488          | -0.183           | -0.4523          | -0.9153          | -0.9927          | 0.2505           | 0.1083           |
| LOC_Os02g57720 | OsPIP1;3                 | 2.1219           | 2.064            | 1.5316           | 0.0339           | -0.9566          | -0.8947          | 0.2744           | -0.389           | 0.4598           | 0.5573           |
| LOC_Os11g45930 |                          | 1.2586           | 1.012            | 1.218            | -0.1468          | -0.162           | -0.4333          | 0.0102           | -0.3373          | 0.1015           | 0.0017           |
| LOC_Os12g32790 |                          | 1.8052           | 1.9369           | 1.5339           | 0.148            | 0.34             | -0.3752          | 0.3794           | -0.0775          | 0.6808           | -0.5421          |
| LOC_Os11g45980 |                          | 2.3116           | 2.8606           | 2.0794           | 2.9145           | 3.5974           | 0.1262           | 2.5974           | 3.8378           | 4.4043           | 0.5905           |
| LOC_Os12g17430 |                          | 2.2495           | 1.5356           | 2.2386           | 0.9074           | 2.7378           | -0.8021          | 3.6279           | 1.4286           | 0.6058           | 2.3035           |
| LOC_Os11g17330 |                          | 1.8625           | 0.8071           | 2.5702           | 1.7217           | 3.6142           | 1.6105           | 3.9774           | 1.2419           | -0.3212          | 2.0683           |
| LOC_Os06g41670 |                          | 0.0035           | 1.9885           | -0.726           | 1.4024           | 2.0834           | 1.1616           | 2.083            | 2.5013           | 2.7577           | 1.9742           |
| LOC_Os11g37880 |                          | -0.0012          | 0.2702           | -1.4369          | 1.899            | 2.2075           | -1.0239          | 1.9016           | 1.848            | 1.3864           | 1.3358           |
| LOC_Os04g53050 |                          | -0.5266          | 1.2766           | 2.6819           | 2.8468           | 0.6451           | 0.2638           | 1.9436           | 3.4479           | 1.3325           | 1.6121           |
| LOC_Os06g41640 |                          | 0.4664           | 0.7308           | 1.7911           | 1.2202           | 1.2075           | 1.2275           | 1.4034           | 1.0466           | 1.3801           | 0.5835           |
| LOC_Os11g44690 |                          | 2.009            | 1.5379           | 1.287            | 1.0705           | 1.6759           | 0.1046           | 0.7787           | 1.314            | 0.3598           | 0.896            |
| LOC_Os11g12050 |                          | 1.4215           | 1.2248           | 1.3999           | 0.9463           | 0.7931           | -0.0516          | 1.8656           | 1.3945           | 0.4936           | 0.4415           |

|                |         |         |         |         |         |         |         |         |         |         |         |
|----------------|---------|---------|---------|---------|---------|---------|---------|---------|---------|---------|---------|
| LOC_Os12g12120 |         | 1.0621  | -0.0887 | 2.3987  | 1.3462  | 2.001   | 1.366   | 1.9394  | 0.1504  | 1.6269  | 1.8123  |
| LOC_Os11g11950 |         | 0.177   | -0.0337 | 0.1847  | 1.9865  | 1.9501  | 1.3158  | 2.0103  | 1.7775  | 1.9052  | 2.1946  |
| LOC_Os11g45050 |         | -0.0906 | 0.1635  | 0.0323  | 1.3649  | 1.2672  | 1.497   | 1.1865  | 0.7384  | 0.5668  | 1.5341  |
| LOC_Os05g01140 | OsJMT1  | -4.251  | 2.0644  | -3.5894 | -1.7733 | -1.153  | -0.3508 | -4.3423 | 0.7307  | -0.1277 | -0.4646 |
| LOC_Os04g39150 |         | -6.2474 | 0.4748  | -2.8745 | -1.488  | -1.2672 | -1.8819 | -4.4468 | 0.4178  | -0.0273 | -1.324  |
| LOC_Os01g28450 | OsPR1b  | -2.569  | -3.1894 | -1.8784 | 1.8782  | 0.4103  | 1.5161  | 0.5027  | -0.4447 | -2.7678 | -3.2751 |
| LOC_Os07g48020 | Perox4  | -4.3273 | -1.4594 | -1.4255 | 0.2657  | 0.5262  | -1.5043 | 1.1996  | 0.4785  | -0.5642 | 0.9936  |
| LOC_Os03g36920 |         | -1.8449 | -1.393  | -2.3    | 2.3622  | 0.9559  | -0.1088 | -0.5613 | 2.3346  | 1.3954  | 1.2536  |
| LOC_Os04g08390 | Bph40   | -2.8048 | 1.2703  | -2.8307 | 0.7215  | 0.137   | -1.5462 | -2.4981 | 1.4766  | 1.2483  | -0.8018 |
| LOC_Os02g58490 | OsAGO1c | -1.8356 | -1.2321 | -1.1439 | 0.4068  | -0.7631 | 0.0094  | -0.9028 | 0.5015  | 0.7344  | -0.303  |
| LOC_Os10g04090 |         | -2.6957 | -1.1651 | -1.9781 | -1.0469 | -0.8866 | -0.2167 | -2.0348 | 0.2643  | 0.3574  | -0.5123 |
| LOC_Os11g39280 |         | -2.4754 | -1.3968 | -2.2923 | -0.357  | -1.2445 | -0.2769 | -0.998  | -0.0195 | 0.5501  | -1.0456 |
| LOC_Os11g30060 |         | -3.9156 | -1.6799 | -4.8419 | 5.8175  | 1.1582  | 1.6569  | 1.7997  | 5.8305  | 5.2439  | 3.0626  |
| LOC_Os03g63240 |         | -4.6272 | 1.5095  | -2.3512 | 3.4646  | 2.9732  | 0.9981  | 2.2794  | 3.1816  | 3.3442  | 4.2558  |
| LOC_Os12g11930 |         | -1.7147 | -1.9645 | -1.5875 | 3.972   | 2.8508  | 2.378   | 2.7183  | 3.8027  | 3.4394  | 2.5465  |
| LOC_Os12g10870 |         | -0.612  | 0.2568  | -0.1824 | 6.5847  | 6.7623  | 6.1674  | 6.7061  | 6.0332  | 5.4152  | 5.3463  |
| LOC_Os12g11860 |         | 1.8083  | 0.1971  | 0.8463  | 7.6367  | 7.6215  | 5.1893  | 7.9751  | 5.8773  | 7.2298  | 8.0244  |
| LOC_Os12g11680 |         | 0.4401  | 0.4996  | 0.8306  | 6.9993  | 6.8344  | 6.5209  | 7.3262  | 6.5152  | 6.9686  | 7.2723  |
| LOC_Os11g11810 | RGA5    | 0.0357  | -0.2446 | 0.2108  | 7.7418  | 7.8081  | 7.6888  | 7.6922  | 7.7285  | 7.873   | 7.691   |
| LOC_Os11g44960 |         | 1.2039  | 2.4188  | 1.4243  | 5.2452  | 2.9167  | 4.3807  | 4.1847  | 5.1518  | 4.824   | 1.8113  |
| LOC_Os11g11770 |         | 0.3173  | -0.2071 | 0.2119  | 4.5139  | 4.1224  | 3.266   | 4.3221  | 4.4308  | 3.8725  | 3.7848  |
| LOC_Os11g45180 |         | 0.5342  | 0.4286  | 0.6771  | 4.8407  | 4.1713  | 5.0359  | 5.1678  | 4.2584  | 3.3372  | 3.2896  |
